# Supplementary material for: Genomic Structure of and Genome-Wide Recombination in the Saccharomyces cerevisiae S288C Progenitor Isolate EM93
Source: PLoS One. 2011 Sep 26;6(9):e25211. doi: 10.1371/journal.pone.0025211 (PMC3180460; doi:10.1371/journal.pone.0025211)
Supplement: Table S10 — Segregant Genotypes and Genotyping Probes (Excel file). Genotyping probes (n = 2965): Nr = Probe number. Chr = Chromosome number; Position = Nucleotide number (S288C numbering) of the first probe nucleotide; Sequence = Probe sequence. Segregant Genotypes: For EM93 tetrads 1–125 (segregants 1–480), genotype calls: 1 = S288C-like genotype and 10 = non-S288C-like genotype; marker location = chromosome #∶Nucleotide number (S288C numbering) of the first genotyping probe nucleotide. (XLSX) [file pone.0025211.s018.xlsx]

## Sheet: Probes
	Table S10. Segregant Genotypes and Genotyping Probes
	Genotyping probes (n=2965): Nr = Probe number. Chr = Chromosome number; Position = Nucleotide number (S288c numbering) of the first genotyping probe nucleotide; Sequence = Probe sequence.
	Nr	Chr.	Position	Sequence
	1	1	407	TGTATACTGATTTTACGTACGCACA
	2	1	3875	AAAATATTCTGAGGTAAAAGCCATT
	3	1	3879	TATTCTGAGGTAAAAGCCATTAAGG
	4	1	6350	ATTTTATTGCAATGGCCCTTAAGTT
	5	1	7917	GTTTTCCACAGTTTAATATCGAATA
	6	1	10572	CTTTAGTATTAGCCAGTCTTAAAAT
	7	1	12540	TAATGATGAAGTAATTTCCTGACTT
	8	1	12596	AAGTAATTTCCTGACTTGTTGTTGT
	9	1	12735	TGATGAAGTAATTTCCTGACTTGTT
	10	1	14306	GATGTTCCCGCGTAGTACTTAGGAA
	11	1	16970	ATCGTATATCGTAATGGATTGTCAA
	12	1	18489	AATGATTGTTGAAAATAAAGGCATA
	13	1	20399	AAAATGCTTACAATACTCCATAGGT
	14	1	21676	TCAGATTGGAGAGAAAAACTTTTGG
	15	1	23671	ATATCGATTTAAATTCGAAGTGTTG
	16	1	24951	AGAAGTAATTTCCTGACTTGTTGTT
	17	1	28109	AATTTGGCAGGATAATGTGTTAGCA
	18	1	29411	AAATACTTTGAAGACACTACACTAT
	19	1	29939	ATCATTGACAGGGCATGAGTTACGT
	20	1	31156	CAGATATTCTGCACTTAAAAACTAA
	21	1	34966	GATATGATAATAGGTGGAAACGTAG
	22	1	37294	TTGAAAAACTTCATTAATAGTTACA
	23	1	42627	GCAGCAGTCGTTCCTGAAGATATAG
	24	1	45095	AAGATATAACGTACTACCAGATAAC
	25	1	49658	TTTTGAAGAATCATTAAGTCAAACA
	26	1	52838	AACGTAAAGGAACATAGTGCTACGA
	27	1	59341	ATCTCCTTAATGGCAGAAGTTGATT
	28	1	80290	GACTCTACTGACTGATTCATTACGT
	29	1	81436	GATAATGTTCTTAGAATATGGTTGG
	30	1	95738	ACTTCCCAGTCCATTATTGTCATTA
	31	1	98402	TGCAGTAGCATTACGCAATAACTTA
	32	1	119337	CTCCTGTGAATGCATCTTTGAAAAA
	33	1	121480	AACTAAAGGAGGAAATTGATGAATT
	34	1	135321	TATTCGCACTACTAACACTGAAATT
	35	1	143816	AAACTGGCATCTAGTTCTTCATATA
	36	1	160164	TATGTCGTCTTTTTACATCATATAT
	37	1	170709	GTTCTTAAGTTCACATCTATCATTG
	38	1	172102	AAACAGATGCGTTTTCAGTATTGGA
	39	1	174097	AACTCTTCAATTGGCTCAGCAATTG
	40	1	175980	AAATAACGATCAAGGACATTCACTC
	41	1	179902	GATTAAAGGACTTTCAGGGTTGTCA
	42	1	180009	ACGATTTAACTTGCTTTTGCTTACA
	43	1	180178	ATCGTAACAAGGATGGGAACATGAA
	44	1	180861	GTATAGCTAAGAGGACGACCAGACA
	45	1	181369	CGCTTCCTACGGTTTGAGTATTTCT
	46	1	182008	ATATTTTGACGTATGCTTTCTTTAA
	47	1	182154	ACTCTCGGACTGAAAGCACTAAGGG
	48	1	182271	TTCACGGAAATCATTTGGTTATGTC
	49	1	183901	CGTTGTAAACCGCTAATGATTATGT
	50	1	184028	TATTGATCGGTATAACTGCCTTCGT
	51	1	184903	AATACCGACGTAAAGATGGATACTC
	52	1	185580	TTTACCTTGAAGCGGAAGCATTTTA
	53	1	185890	TAACTAGTGAATAAAAAAGCTGTTG
	54	1	186016	GTGCCAATTTAGTTGAGGGAAATGT
	55	1	186148	TTGATTTCACTGACTAATTTCCGAG
	56	1	186629	TTTACCAATCCACTGACGCTAAAAT
	57	1	186772	TCTCCCAGAACGATCAGAAAACTTA
	58	1	187234	TGCGTTGCCTTTGAGATACTATTGT
	59	1	188046	ACAGAAACAACCAGGAATACTATAG
	60	1	189875	AATCATGAGTGCATAGTCCAAAGTA
	61	1	190132	GACAATAACCACACGACAATAACCA
	62	1	196098	AGTCTATACTGGAAATTTAATGGAG
	63	1	198648	TTCCATGCAACGTCGAACTCTCAAA
	64	1	199607	TCCATACTATAAACCCGATGGTGAC
	65	1	199871	ATCACTTTAGCTGGTCCCATTCGAA
	66	1	200536	TTTGTAGCGAAATTTAACCTCACGA
	67	1	202092	TATCTCATTGAATGGCACTAGTCGA
	68	1	202352	ACTTACTACTCAACGATTTCACAAC
	69	1	202364	ACGATTTCACAACCTAGCATAATAC
	70	1	207154	TGTTTCCACAGCTACTGTTACTGTT
	71	1	224761	CGTATTAAGGTGAAACAATCAAGAT
	72	1	227257	GGTTGACCGCAGTATTATATAATAA
	73	1	229514	TATTTGTATAGAAAGGGCATTACGC
	74	1	230057	GTTGACATGGAGTTAGAATTGGGTC
	75	2	6027	CAATTAGCCATATTCAACTTCACTA
	76	2	15096	TCGATGTCATGATTTTGAATAATAT
	77	2	15509	GGTCTCTAAATCAATGTGATCAACT
	78	2	16370	ACATTGGAACCCAGTATACCGAAGG
	79	2	17554	GTGCCTCTCTAATATTCGTATTACA
	80	2	18067	TAGCAATGCCTCATAAATACAATGT
	81	2	35835	GGTTAGTGTCTCTGTTGATAATTAG
	82	2	36205	TCTCGTTCCAACAGTCTCGATCCAC
	83	2	40974	AATTTCGCATTGATCGACTATTTTT
	84	2	46708	GTGAAATATTTTGATCTTCTTGAAG
	85	2	118939	ATACAAATGAAGGATGCAAAGACGA
	86	2	120409	TTTTATTATTTGATCGACGTCTAGC
	87	2	120413	ATTATTTGATCGACGTCTAGCACTG
	88	2	130753	CAAAGCCAGTAAATCATTCAAAGAA
	89	2	133149	ATAAACGATGATAATAGCGATAATA
	90	2	136618	CTATACATCCAAGTTTTTTCACAAT
	91	2	137735	TTAGTCATTTTCAACTCTATACCAT
	92	2	141170	AAACAAGCGGTATAATACAAGGTGA
	93	2	141174	AAGCGGTATAATACAAGGTGAACTG
	94	2	141178	GGTATAATACAAGGTGAACTGAGTT
	95	2	143314	ATAAAGAATAAGGTTCAGTTGGACG
	96	2	143318	AGAATAAGGTTCAGTTGGACGATTG
	97	2	146091	GAAATTATTACCAATTAACAGTCCA
	98	2	150186	ATACCAGGTAAATGGAACAGTTAAT
	99	2	158790	TATCTTGGTCCTGAGATAACCTTCT
	100	2	162250	AACATTAATTCAATAAAGAACACAC
	101	2	164973	TCCTTTGATCTTCACTACATAATTT
	102	2	166303	CAACTTTTTACTGTCTTATAACGAT
	103	2	168430	TGTTTAACAGTGATACTAAATTTTG
	104	2	180247	CTCTTATGATGTTGCAATTCTGAGT
	105	2	183446	GGCCCGTTTATTATCCTCGCATAAC
	106	2	184230	TTCAGAAAGTTAGTTTGTATGTACT
	107	2	186745	TCTTTGGCTTGTGAAAGAACTTGAT
	108	2	186749	TGGCTTGTGAAAGAACTTGATATTC
	109	2	186761	GAACTTGATATTCTGTCTAAAGGAT
	110	2	190968	AGAAATGCTGATAGGACTATTTTCG
	111	2	191196	TTCTATATAGCATTCACGAGGTGAA
	112	2	191518	TCTTCGGCATTAGTTAAAGGAATGA
	113	2	193537	AACCCGAAGAACAATGTATACATAT
	114	2	198087	GTGTTGAAAGATAACAAATGCCACA
	115	2	200521	ATCATCTATCCGCTTATAATCACGT
	116	2	201868	CCCACAGGGTAACCCATATTTATAT
	117	2	205552	CCTCTCTAACATTCCATTATTCTCT
	118	2	209346	TTCTGAGAACAGTTATCTTTAGCTT
	119	2	211576	TGCAGTCCGATGTCATACCAGACAC
	120	2	220386	CATATCCCTTCTTATGAAAACGCAA
	121	2	220390	TCCCTTCTTATGAAAACGCAAAAGA
	122	2	220894	ATATAGGAAAATGTTAGAAGTTCAA
	123	2	226948	TTTCTCAGGAATCCCAACAGTTATG
	124	2	227324	CTTCCTGGCTCATTTAAAGCTAATG
	125	2	232606	ACCTTGGGTAAAATCAGTATTATCT
	126	2	234598	AAACAAACTGGAGAGGATCTAAAAT
	127	2	236308	CAGTAACCGTTATTTGAGCATAACA
	128	2	238148	ACTGGCACCTACTAATATCAATAAT
	129	2	238183	TCTTGAGCAAATTGATCCTACATAA
	130	2	238594	GTCTTATACAGTACTACCCAAGAGC
	131	2	238602	CAGTACTACCCAAGAGCTTAAGAAT
	132	2	239512	CAGTTTCGTGTTATAATAGAAGAAA
	133	2	239856	GCTTTTCCAGAGTAACATTGTACTT
	134	2	246572	CCTCTTACAGTTGAGTTACAATATT
	135	2	248653	TTTGAAGTTTTTCACAAGCGGAATA
	136	2	252008	ACATAGCTACTCTCATGACCAAATG
	137	2	253086	TCAACTAAGCTGAAGTGGTATATAC
	138	2	258844	TTATTGTGTCGTGCATTCCATTAGA
	139	2	259544	CTTACTTTGAGCTTATTCATGTTAA
	140	2	265486	ATCTCAGTAATTCACAGTTAACAAC
	141	2	266540	TTCTGCTCTACGTTAACCTACTTTA
	142	2	268834	ATACTTAGGCAGAATCTTGTTACAA
	143	2	275971	ATCAAAAGTAACGAAATGAACTCCG
	144	2	278870	AGATATATAAATGGAAAAGCTGCAT
	145	2	280672	TCACAAAATACGCAATAATAACGAG
	146	2	290464	TGCTTGTCAGTTCAAATTATTAATT
	147	2	302383	CAGTCTATTTGTTCCCTCGATAACT
	148	2	307498	CCTCTTTAGCAATGGTGACATATAG
	149	2	326906	ATACATTGGATATCTCATCTAAAAG
	150	2	328518	CCTCATTTCAGTAGTCGAATAACCA
	151	2	331773	ATATGTAGGAGTAAATCTTTGTTCT
	152	2	340534	TAATTGGCTCTACTAATGGAAAAAA
	153	2	343828	TTGATTTGTTGATCCTATCTATCTT
	154	2	351900	AAATAGAGGTAAGAGATTAGACACG
	155	2	357769	CTTCTTTTAATGGAGATAGTTCAAT
	156	2	362248	TAATTCTTCCTGTATCTTTCTTGGT
	157	2	365105	ACAAACAATAAAAGCTTCCAGAGAT
	158	2	371120	AAAAGATGGCTTTGTATTCAGTTCA
	159	2	380859	GATGGATAAAACAGACGCTTTCAAA
	160	2	389572	ATATAACCCTCCAGTAACTATTAGA
	161	2	394406	TAACTTCGACTCTTCTTCCAGTAAC
	162	2	401590	TGGAAGTCATTGAGGTTTTATCATT
	163	2	407545	GATACTTTGGAATAAGGACATTAGC
	164	2	410961	ACCAGCCAATACACATCAAAAAACA
	165	2	413099	TTGAAGCTTGTTGGTTCAGAAAAGA
	166	2	415852	CGTTGAAGTGAATCTAAAGTGCGCT
	167	2	421670	AGAAAACATAACAAGATACCCGAAT
	168	2	423780	ACAGACCTAAGTCCTTGAATGCTCT
	169	2	427510	AGCTCCGATATCTATTTCAGCAATA
	170	2	433174	TCATTACGGTGATTACGAACAGCTA
	171	2	437279	ATTGAGTTTGAGACCTTACTTACAA
	172	2	439784	AAGTGAGAAAGATAGCAATAAGCTA
	173	2	442009	GAATATAAGACACAAGGAATCGGAA
	174	2	456637	CACCTGTAGAAATGAAGGGTGAAGT
	175	2	458786	TATCTTTCAATCAGCAATTAGCAAA
	176	2	464638	TTTCGTAAAGAGTACCTAGATCGTA
	177	2	470852	ATACCTGCCTTTTGTAATCTTGCAA
	178	2	472830	CATTGATGTAATCTTCTACTAGTTG
	179	2	475960	ATCCCCTACAATAGCAAACGTATAT
	180	2	505379	TAATAAAGAATAAACAAACAAGCAA
	181	2	516323	CATTATATCCCTCAAATTGCACATG
	182	2	517317	AATCACTGCAATACTCTAATTTAAA
	183	2	520951	TAGCTAGTGTAATAAAGGGCTTTCT
	184	2	521954	TTCAATAGAAGTGTCGATATACAAA
	185	2	529530	AAATGCCGTAATACAACACTTAATG
	186	2	532566	TTTGACAGGATGCTTTTTAACAAGT
	187	2	546003	CCATAAAATTTGCCATCAGAGTAGC
	188	2	547955	TAAAAGAAGAATTCAATATAAGGTC
	189	2	550604	TTTGTAGGTGAAGTAAGTGAGTTAA
	190	2	553328	TATGAAGATCGGTTTCAGAACAGAA
	191	2	555544	TTACCTGCATAGGCACTCATAGGCC
	192	2	562919	TAGTACAATGTCCAGAAGCTTGGTT
	193	2	567638	TATGCAACTTTCATTAAGAGGTCAT
	194	2	577162	TTTCATTCTTGACCTGTTCTACGTC
	195	2	580348	AATTTAATATCGACTCCCTTGGAGG
	196	2	582439	GATTGAAAGCTACTTGTGCGAAAAT
	197	2	584373	GTTCATAACATCTAAACTCTCAGTA
	198	2	586941	AATATAATGTTCCCCACAACCTTTG
	199	2	588309	ATTTCATAAGTCTTGGGATTTTGTA
	200	2	597545	TATTTGTCCTTATTACCCAAAAGCA
	201	2	605690	AGAAGATTTTGATCGGATTTAAATT
	202	2	614108	GCTCATTTCAATAGCAAAAAAATAG
	203	2	622866	AATATTTCCACTCAATCATAATGCA
	204	2	625713	ACCTAGATTAGCTTGAATCTTGCAG
	205	2	642469	CTAACAAAGCTCGATTCAAATTAAG
	206	2	649572	TCCAATGCTACTAATAACTTACCTC
	207	2	655436	TGTATCTATGTCCGATAATATGGTG
	208	2	658770	TTCACCATCCTTAATGAAAACGTCT
	209	2	660217	TTCAAGGCATCAAAAACTCTAAATA
	210	2	664704	GTATATTATACTGCCTCACCAAACG
	211	2	670289	CATTAATGATCGGTTGAAAACACAT
	212	2	676100	TGATGGTAGGGAGAAGAAATTTGAT
	213	2	681381	AAATATTATCTCCCAACCTACTATA
	214	2	693911	AAGCTTTAGACCCTCTGCAAGCAAA
	215	2	699855	TTTTTTTCGAGAGTATGATTTGTAT
	216	2	701859	TATAGGCTATATATATACGTGGTGA
	217	2	711780	GCAATCCTAGATTTGAAGTTATCCC
	218	2	713311	TATTTTTTATCGAGCAATATTTTGA
	219	2	719407	TTACGATTCCTCACTGGATAATATA
	220	2	721065	AGGTTTGACTTTTACTACCAGTATG
	221	2	726969	CAAGACAGGGCCAGATATATTCTTG
	222	2	730841	GATCTAACTTTCAAATCTTTTACAA
	223	2	740339	CACAATAAGCACTTCAAAGATGTTG
	224	2	745172	GAAAAGACTTTTGACTTGGTATACA
	225	2	750788	TGTAATGAATTAGTAAAACGACATT
	226	2	775543	CATGGACTCTTATGTAGAATTTATC
	227	2	777859	TCATTCCTTTGTATAGAGTCTTCAT
	228	2	782358	CAATAACACACAGAATACATAGAAA
	229	2	784788	TTAATGGAAATAGAGAAAATAGTAC
	230	2	797323	CTATTGTCGTAAAATTTAGATCTTT
	231	2	799494	ACTGTGAATTCAACAAACCATAAAT
	232	2	803651	AGCTTATATCCTAGTTCTGAGTTGG
	233	2	805320	GTCAAGCGTAACTAAAATACATAAA
	234	2	809928	CATGAGCTTTTGTATATTCCTTGAT
	235	3	108780	TTCTAGGTGATATTGCAATTACTTC
	236	3	113144	CAAAACTAAGAAGAATGAGATGATA
	237	3	114150	TTACTTGTCTTCTTTGCTACATATT
	238	3	114170	ATATTGCTACCACTTCTATTACACA
	239	3	115104	TCTTTAGTTAAAGTCTGTGCATAAA
	240	3	116209	TAGACCAAATATCAAAAGCGTGCAG
	241	3	117976	AGAATGTTGTTCCTTAATGTACTTC
	242	3	120330	ATTGAGTCTGTATTGTTTTGTTTAC
	243	3	123486	GCTCCTGAGTACACTTGTTTTACGT
	244	3	126785	TAAACAGAACACAGACTTACATTTT
	245	3	128257	ATAAGTTGTACTAAGCCTTTAAGCG
	246	3	129299	TTTAAATTGTCCTGAAAGGGATATA
	247	3	139536	TCATTTTTCATTTCTTTCAGTTCTT
	248	3	148655	TCTCTTAGTTGTTCGGCATTCTCAA
	249	3	149017	CGTCTAAAAGTCGAAGAAGTTCATT
	250	3	151008	ACACAGCAATCCTATATCACTATTA
	251	3	156945	ACATCACAACATAGCATAGCAATAT
	252	3	158123	CTTGCCTACTATCTCCATGTCAAGT
	253	3	172800	GAGAATAAGCATAGTTTTACATAAC
	254	3	181440	AAATTTAATGAGCTATCAAGTGATT
	255	3	182632	CGCAACTGTTACAGGACTTCAAAAT
	256	3	185537	TAATTTCGAACTAGTAAGGCAAATA
	257	3	189036	CCAAAAGGAGCTGTTCAGAATGGTT
	258	3	191918	TCCTCCCACTAATGTTAATTGCTTA
	259	3	208068	AAAAAACTAATGTTGACATGACATT
	260	3	227750	CAAAAGACATGAAAATTAGTTACTC
	261	3	238334	TGGAGGGTATCTGGCACTTCGGTCA
	262	3	243767	ATACCCTCTCCTTCAGTTCTTGAAA
	263	3	244165	GAACAACGTTTCTCTATGAATGAAA
	264	3	246792	CAAAAAATGAAGAAAATGTGATTAG
	265	3	249279	AACACCCATTTAAATAAAGCCAGAT
	266	3	255686	TTAACTATCGTCACCTGTAAACAAT
	267	3	256442	ACAGTGTTGCTAAAAATATTCAAGA
	268	3	259703	ATAAACTAGTCATCGATTTTTATGC
	269	3	262947	TGTACAAATAATGATGTTTACAATG
	270	3	266990	GTTTATATGACTCCTCTACAGTATT
	271	3	267138	TGTTTTAGAATCGCATCAGGTGTTT
	272	3	267995	CTCAACCATAGATTTTACTTCTTCT
	273	3	274236	TCCCTCTTTCAGCTATATTGTTCAA
	274	3	275977	ACTTTAGGAATATTGATTTACGAGA
	275	3	277288	CCGTTTATAATATCATCGTGCGCAC
	276	3	282856	AAATAGACTTGAAATAGTTGTGCCT
	277	3	283678	AATAAATGAAAATATTGGCATTGCT
	278	3	284502	TTTATGCCTTGGACAGTAGGAAATT
	279	3	287990	TTGTTGACTTCCTGAAACGTAAACA
	280	3	291500	TGGTGATGAGATAAGATAATGAAAC
	281	3	292432	CGTATCTTGTACCCTTTTTATTGCA
	282	3	292822	GATCATGTACTAAACTAAAATCAGG
	283	3	306394	GCTTTACACTCACCTAGGTTCTCAT
	284	3	310104	AATACAGATTTACTTTGGTCGATTA
	285	3	310505	ATTAAATCTGAAAACTGAATACCCA
	286	3	313055	ATACGTTGTGTATTTGATCGATGTT
	287	4	2561	ATTTTTGCCTTGCATTTCGTATCTT
	288	4	4106	GTCAGTGACTTCCCATTATGAAATT
	289	4	74621	ATTCTTCTGAAAGGTGAAACTTCCA
	290	4	74721	CTTCTTCGTAGCCATCATTATCATA
	291	4	76560	AGTAAAAGGATTACGTACGCTATTG
	292	4	78164	CAAGTTTTCCATCCATAATTGTTTT
	293	4	78572	GGCACTGAGACATTACCAAATTTTA
	294	4	78576	CTGAGACATTACCAAATTTTACATG
	295	4	79310	AAAAAGCTATTGGTTTGCTGAATAT
	296	4	80234	ATCGAACTTTCTAAACCCTCAATGA
	297	4	80839	ATCTAGCAGGTGTAATATTGTGGAA
	298	4	82283	TCGCTAACAAAAAGCAATTTAAGTA
	299	4	82735	TTTTCTTTGATGTAAGAAGAAGCAA
	300	4	83033	CACCTCATTTTCCAGTAACTCTTGA
	301	4	83318	GCGTTGCTACATACATAAATCTAAA
	302	4	83499	CAGTCTTGTATTAGTTGTTATCCAA
	303	4	85329	CAAATAATTTATGATTCGTTAGGAA
	304	4	86456	ATTGTTATTGATTAGATGCACCATC
	305	4	87296	CTTTATTATGATCCAGCCTTCAATA
	306	4	88136	TACTGTTCCACTTTTTGTATGTTTA
	307	4	89535	AGATTACAGTTACCTCAAGAATTTA
	308	4	89737	TCTTGATTGGTGAGGAATTGACCTC
	309	4	90621	TATCGTATGATAGAAGCAATTATAT
	310	4	91305	GGAATGGGGAAAATTCAAATGCGCT
	311	4	92660	ACTGAAAGATAAAGGAGATAAGGAA
	312	4	97512	CTGGTGAACCCAAACTCTCTTTTGT
	313	4	98278	ACAAGTCTTTTTCATAGTGTAACCT
	314	4	102688	GAATCTACCCAGTAGTAAACACCAT
	315	4	103386	CTCTGTAGTATTAAATTTAGCGCTC
	316	4	103512	GGTGATACAGCTATTACATTGGAAA
	317	4	104584	TGTTTGATATATGTCTAAAGGCTAA
	318	4	106130	ATTCTCTTTTCAGCAGAGCTCTTGT
	319	4	106286	TCTCGGTAATGATTCACTAAAGATT
	320	4	106290	GGTAATGATTCACTAAAGATTGAAG
	321	4	106885	CTATCTTGCTACTACTTCATAGATT
	322	4	110267	TACTATTTCTACAGCAAACCAAACG
	323	4	112113	AATTTTCATCTTCTCTATCGGAAAT
	324	4	113993	GTGAGACGTCTGATAATTTGAACAC
	325	4	114137	TGATGGCTGACACTAATGAACATAA
	326	4	114141	GGCTGACACTAATGAACATAATAAT
	327	4	114149	CTAATGAACATAATAATGAAATCCT
	328	4	120012	TGGATAGTATTTAAAAGGCACTGGA
	329	4	122554	AAGTGAGAGTATTGAAAAATCGAAC
	330	4	125395	AGAAGAAGTTTTAGGAGAATAGAGT
	331	4	127763	GAAGAGAAACTATGTACAGCGTCGT
	332	4	128562	GGACAATATCGGTACTCGTGAAACA
	333	4	128566	AATATCGGTACTCGTGAAACATTTC
	334	4	128701	TCTTTAGGCTTAGTAGTCTCGGTTA
	335	4	128705	TAGGCTTAGTAGTCTCGGTTAACGC
	336	4	128913	GAAGGAAGACGATTATTATGGGATT
	337	4	129550	TTGAACAAGTTTTATGATTCCAATT
	338	4	130715	GCGCGTGGAAAAAATTCTAGAAAGA
	339	4	133475	GGGCGACTATCTTTCTAATGTAAAT
	340	4	141892	AAGAGCTCTAAGGTCAAAAACAATA
	341	4	143888	ATTCGGATAATACCCCATGATTTCG
	342	4	144368	GTAAGAAATTTACATGCTATTTTGA
	343	4	147073	TATCGTGACATATTTTCAAAATTTT
	344	4	147999	TTGTAGTGATATTTCCTTGTTGTAA
	345	4	149675	CTACCATAATGCTCTTTCACTTCAG
	346	4	153392	TCTCTATTCATTCTGACCAAAGTTT
	347	4	153707	CTCTTGTCGAATGTGATATCAATTT
	348	4	156303	TTTTTAAAGTGAGGTATGAATTATG
	349	4	156814	CTAATCATTTGTCTATATCATCATC
	350	4	160999	CAACGTATTGAACTATTAAAACCAT
	351	4	163885	TCATATCCTTCGAAACAGTCGTTAT
	352	4	167285	CTCTAAACCTCCAAAATCATTACTT
	353	4	170345	AATCGACGATTAGATCACAAAAAAA
	354	4	178040	TAGAAAGATCTAACTAAAAAGCCTC
	355	4	179630	GACGAATGCAGAAATATTTATAATC
	356	4	180292	TACACAGAATGGTTTAATTGTGTAC
	357	4	184878	ACATTTAAGAACAGCCTGAAATATC
	358	4	187198	GAATTCTGAATATGTGGACGGATTA
	359	4	189496	TCTCTGCCTTGATCTTCAAATTTGA
	360	4	190666	CTAAATGCTCATCTCTAAATTATCA
	361	4	193103	CGTGTACTCCTTAGAAATCATGCTC
	362	4	193107	TACTCCTTAGAAATCATGCTCAAGT
	363	4	193356	ATTATGAAGTACTGTAAGTGTGTTA
	364	4	196439	TTCCCTGAACTTTTGTGATATATAA
	365	4	199730	CATTTTCGACATTAGCTTATGCCAA
	366	4	202222	TTCTTGCTATATACCCATCCATAAA
	367	4	205228	ACCATAATGCTATGAAAAATAATGG
	368	4	208651	CTTTTCTCTCGTAACAACATGAATT
	369	4	211108	GCACTCTAAAGGACGATACAAAGCT
	370	4	211822	ATACACATGACCATTTCTTTCAGCA
	371	4	211826	ACATGACCATTTCTTTCAGCAATTG
	372	4	213537	AACGCATACCAAATTTCCTACACAA
	373	4	217331	CTATAATATTGCATCTGTGGTTTGC
	374	4	221078	TTACACTAAAACTAATTGGAGTATG
	375	4	222241	CTTGGCTTTCATATAGTGGAAGAAA
	376	4	223828	TCCGGCTTGGCATTTATTCATTAAC
	377	4	224800	TGATCCGAGTAAAGATGTTTTAATA
	378	4	225231	AAATTACTTCTTTGTACGCACTAAT
	379	4	229438	TTGTTAAGGCTAAAGGTTCTGCAGA
	380	4	229820	CCTTCGTGATATTTCAAGGTTAAAT
	381	4	230513	GTTTATTCGACTAAACATACAAGGA
	382	4	231383	TCCACATCTCACTGGAAGTTACAGG
	383	4	239988	CCTATTTGGGTCCTTGCAAAATAGT
	384	4	240244	CAACACTTTTACAGATGTCATTTCA
	385	4	240596	TGACTATGTCGATCTATACCTTTTG
	386	4	240600	TATGTCGATCTATACCTTTTGCATA
	387	4	241928	GTTTGCCAGTCAAAGTAAAAGAGCT
	388	4	242050	TTTTTCCCATAAACGTCACTGAATG
	389	4	244017	TAACTCGAAAGTATTGTTTAAGTCA
	390	4	244132	CAAGATTCAAGTGAAGATGAAAACA
	391	4	246642	CCTTTTTTGAAGAATGCGAGATTGC
	392	4	249500	TACAAAGATAAATGATTCACAGGAG
	393	4	249650	ATATCCTAAACTACCAGATATTCAG
	394	4	251488	AAAACGAGGTATATCAGCTAATTCA
	395	4	252738	TTAGCCATTTGCCTTGATATAATTA
	396	4	256562	TTGATCTTCACGTTGTTTATATATA
	397	4	257567	TGGTGTTAGTGGGATCTAGTGGATT
	398	4	259984	TTTTGATAACGAGCATTTACACCAT
	399	4	259988	GATAACGAGCATTTACACCATAGTT
	400	4	259992	ACGAGCATTTACACCATAGTTGGGG
	401	4	260651	AACATCGGAAAGGATACTATTTTTG
	402	4	261605	AAATTGTTAAGAGAAGATGTCAACT
	403	4	263805	ACCTTGTTCAGTAAAGAAGTGATTG
	404	4	266012	GAAGTAATTGAGAGTAGTCCAAAAA
	405	4	267349	AAATTTGTAAGAATTCAGAAGCGGT
	406	4	268718	TAGAATCTGTGTTATTGACATTAGA
	407	4	269271	CTAAGCTTCAACGTGATACATGAAT
	408	4	269879	AAAGCTAGGGAATGATAAAGACAAG
	409	4	272831	CAAGCTTAATAATATCGCCGAAAAT
	410	4	274575	TTTCTATCAGGGCTCTTTCGGTTAA
	411	4	275706	GCAATTAACCCAACTGATTCATGCG
	412	4	276369	GAAATTTCGACGCCAGTATCCTTAG
	413	4	278681	TTGCAACTTTGGATTTCAATTCTTT
	414	4	282839	GACCGTCACTTCCGTTATTGTTAGC
	415	4	288936	CACGTTCAGGTTATTCACTACTTAT
	416	4	290061	TTGCTGATATTTACTGCCATCGTAA
	417	4	292497	TGGCATTTTAAGCACATGAGGAGAT
	418	4	292501	ATTTTAAGCACATGAGGAGATGAAC
	419	4	292593	CGCCCTAAATTGGAGGCTTCTACAA
	420	4	293175	CATCAGTAAGACAGGAAAGAAAAAC
	421	4	296520	AACGTTAGCCAGAAATAATAAGAAT
	422	4	297957	TTTCTCAAGTATCTGACCATCAAAG
	423	4	298297	TATACAGTTACGTAAAAATCAATAA
	424	4	301030	GTGTAGAGCCTTTTGTAGTATAACT
	425	4	302240	CACTCTGTACACGCTATATACTAAA
	426	4	307557	TAATATTTTCCCACACAATTTATTG
	427	4	308239	GCAGGCAATTTTTTGTAGTTAGAAA
	428	4	316797	TAATAAGTTATAGTGTTCTTGTACA
	429	4	316841	CGTGATGTGATTTTAGCTGTTTAAT
	430	4	317906	GCTACAGGCTTGAGAATCATAAAAA
	431	4	318306	GTATCTATCAGAGTTAACATTGTGT
	432	4	320996	ACCCGCAATGTCTTAAAACTAGTAT
	433	4	321004	TGTCTTAAAACTAGTATTGGGTCTG
	434	4	322377	ATTTGTACCACAGAAACCTATCAAC
	435	4	322482	ATACACTTCGGCTGGACTTAAAGAG
	436	4	323708	TATGGACATTTGTGATGAAAATATA
	437	4	325064	TCTTCTCGGACCTTCTTCGTATATA
	438	4	326969	TTGAGCATAGAACTAACTTCCGTGT
	439	4	328132	AATAGTAAAAGTGCTGTTAAGTGAT
	440	4	331896	TAGACCCAAAAGAACAATTCATCCA
	441	4	333733	ATAGTTCTGATGGGAATATACCTGC
	442	4	333737	TTCTGATGGGAATATACCTGCGAAT
	443	4	334879	GCTTTCAGTAAGATTAAGGTCAAAC
	444	4	336905	ACTTTTCAAACTACTACATCCTTGC
	445	4	339109	AATTTTATCATGGATTCGTTACGTT
	446	4	340389	TAAACAGGGCAGTACTATTTCATCA
	447	4	340393	CAGGGCAGTACTATTTCATCATCAT
	448	4	342616	ACAAACAGTTTTCGAAAGTAATATG
	449	4	344357	CCATCGACATAGTAATTATTTGTAA
	450	4	345748	AACTCCACTTTGATTAGCGATAGGA
	451	4	345752	CCACTTTGATTAGCGATAGGAGATC
	452	4	347600	TCGAATTCATCACTAAAACTTTGGG
	453	4	351857	GGGTGCAATTGTACAAAACTAGTAC
	454	4	354268	TCACAAACAGTAATTCACCATATTG
	455	4	355002	CAAACGGTTGATAAAACAAAAGCTG
	456	4	357618	TAAAAGATTTGTAATTGCGTATATG
	457	4	358542	TAAAATCTAGGCACATATAAAGAGA
	458	4	358546	ATCTAGGCACATATAAAGAGAAAAT
	459	4	359391	TTCCCAATCACCTTACATCATATAT
	460	4	373341	GGAATTTTGAGCCTTAATGAAGAAA
	461	4	373373	ATAAGCAACTCAGATATAACAGTAG
	462	4	378748	GAAAAGAAATGACCTATAACAATGT
	463	4	378752	AGAAATGACCTATAACAATGTATCT
	464	4	381688	ATGAAAATTTAGCAGTATTCCCCCT
	465	4	383483	CAACTGAGGTTGAAATGACTACAGA
	466	4	384219	TGGAGTAGTTGGGTTAATTGAAGTA
	467	4	392119	GGTGACTCTTACTGCTTTTTATAGA
	468	4	393410	CTTTTCCATTCATTTCCTGCATAAC
	469	4	397846	ATGACAAGGATTTGCCTAATTTCGA
	470	4	398514	TTAAATGATGAATTTTCTCGAACGA
	471	4	400883	AATATGTAAAAAAGAGTTGATCAAA
	472	4	400887	TGTAAAAAAGAGTTGATCAAAGTAA
	473	4	402350	TTAGATGAAGATGATCCAGTAGAAA
	474	4	408112	AATAGCCGTTCATCTCTTTTATATT
	475	4	409992	TCATCGCTAAAGAGGAACACTGAAG
	476	4	410535	ACGTTTCTCACGTACATAATAAGTA
	477	4	421982	TTTCGAGCTTGATATTAATATTACA
	478	4	422731	GGCTATTTTGGATACGGTATGTCAT
	479	4	423369	TGTACAGTCAATTTCCGGAGTTAGC
	480	4	424889	AATCAATATTCTCCTAACTCACATA
	481	4	433155	AATAAAGAAGCTATCACCAACGAAG
	482	4	434734	CAATTTTCATTCTAGATAGCGGGAA
	483	4	435245	AAAAGAGATGTTTGTTGAAAAATGC
	484	4	435970	ATTGGAACGTCGTAGAATCAGAAAT
	485	4	435978	GTCGTAGAATCAGAAATCATAAGAC
	486	4	436298	TGGAACGAAATGACTTCTGGCTTTT
	487	4	441606	CCATAGAGTTTAAATCGTTGAACAT
	488	4	443780	TACAACTGTTTCTTTAAATCCTGTA
	489	4	449452	TACCTATTTCAGAATGTATGTCCAT
	490	4	449540	TAAAGAAGTGCTAAATTGGCTAGTG
	491	4	451421	AGCTTCTGTTAGCATTCAATATTTT
	492	4	463119	CCCTAGTGCACTTACCCCACGTTCG
	493	4	465679	CACTGTAGGATATAGGAGTTACTAT
	494	4	469351	ATGATTTATCGAAACAAGAAACTAA
	495	4	469767	TTTGTCTCATCGTATTTTCCATTAA
	496	4	471223	CAACTTAGAAAATGAGTAAACTTAT
	497	4	474307	AAAACGTCAAAATTATCACTAGCAG
	498	4	505036	CACAAGTAAAACGATTTAAGTCCAT
	499	4	505040	AGTAAAACGATTTAAGTCCATAATG
	500	4	512541	ACAACAATTTCTTGAAAAAGAGAGA
	501	4	513670	TGATGCACAAGAAATGTTGAGAATG
	502	4	521459	TTTTAATTCTAATCGACAGCTAAAA
	503	4	551575	TCAATGTTTCTCGTATATACAGGAC
	504	4	563607	TCTTCCTGTACCATAAGCTCACATG
	505	4	565295	ATCGTTAGTCTCGTCATATGATAAC
	506	4	568005	CATCCATACGAAAAATAAGAGACTT
	507	4	568854	AGAATGTTTTTCCGACAAATAGTAG
	508	4	572168	AATACCAATGGCGTTGTTAAGAGTA
	509	4	576695	ATGTTCACGACTTCTTAGGTATGAC
	510	4	577838	CCTTACTACTGTATTGTCCCTCAAA
	511	4	590002	TTATATATAGGATAGCCCAGAATTT
	512	4	593703	TTAAATACTATCAATTTCCGTGTAC
	513	4	597095	TCCACGTAGCAAAGTAAAACAGCAC
	514	4	597467	CTTTAATTAGAGGCAATCACGAAAC
	515	4	598633	GTGTAATTCGTTAGAAGGCATACAA
	516	4	598709	ATGCCCATAAACATACTAAGAGAAC
	517	4	598713	CCATAAACATACTAAGAGAACGCTT
	518	4	599549	AATATTGCCTCATTTCCAACATTAT
	519	4	620090	ATTCAGACCGACTTCTCTTGTGGGG
	520	4	623944	CAGAAGAGTTCGAATTCACAAAAAA
	521	4	625225	GTTATAGTTAGTAACATTTCGGTCA
	522	4	628726	ACTACCCGGCTAGAAATCTGGTTCG
	523	4	628786	ATGGTATTTGCTTATGAACAGGTGA
	524	4	628790	TATTTGCTTATGAACAGGTGACTGA
	525	4	628858	GATGCTAATGACCGGCTCTTTCTTA
	526	4	660966	GAAAATGATATGCCAGTATTATTAC
	527	4	672844	TTTTTATCTTTAAGCAATACGTGGA
	528	4	683903	GCATTTTTACGCATTTAAACATTTA
	529	4	691737	TAGTATTTGGATTCATTTTGCTTAA
	530	4	694225	ATGTAACTTGCCTTTATTACCTACA
	531	4	694229	AACTTGCCTTTATTACCTACATACA
	532	4	695779	ATATCCCCAACATTTATCTATCGAA
	533	4	698250	GCAGTTATTCTGTTTGTGAAGACAG
	534	4	701438	TGAATGATTCTGGGTTATCTAAAAA
	535	4	704232	AATATAGTAAATTGTCATGCATATG
	536	4	708989	ATTAGATGACGAACTTTTAAGTAAG
	537	4	710455	ATTGACTTTCTTTGGAGATCAAGAC
	538	4	713092	ATTTTTTAATCCAGTAGAGGCATGA
	539	4	713096	TTTAATCCAGTAGAGGCATGATAGA
	540	4	715612	AGGATCACTCAAGCTGTATGTAAAT
	541	4	715616	TCACTCAAGCTGTATGTAAATGTAA
	542	4	716436	TTCCATCTGTCTTGTTAGGTGATAT
	543	4	716630	GAACTATGTCACATCACTGCAATCC
	544	4	717350	AAAAAAGCCTGTGATTTAGTTGGCA
	545	4	717522	TTCGCTGTAAACCAATGACGCTAAT
	546	4	718234	TCTATGTAGTGAAAGTTTAGGACAG
	547	4	719363	TTTTCAGTCATGTCAAGTTTAATCT
	548	4	720424	TTTCACTGCTCAGACTATTCAATTT
	549	4	720428	ACTGCTCAGACTATTCAATTTTATT
	550	4	730061	TAAGTGGATGATAGGACTAAAATTT
	551	4	730065	TGGATGATAGGACTAAAATTTGTAA
	552	4	733129	AATGAGAAATTCGGTATACTACAAG
	553	4	739031	TAATAAGAACATTCAAAACGGGAGA
	554	4	739035	AAGAACATTCAAAACGGGAGAGTCT
	555	4	744142	TATATAATTGTTGATTAAGAAGCCA
	556	4	744146	TAATTGTTGATTAAGAAGCCAGTAA
	557	4	745985	GACATAGACTTCATTACTTGGTAAG
	558	4	746159	TTCTCTCGTTGATACTTTTAGCCAA
	559	5	4078	AACTGTTACCAAGCGTCATAACTGT
	560	5	6780	CCGTACCTCTATGAAGCTGCACAAA
	561	5	7007	GCATCATAAGAGTAATTTTCCAGTA
	562	5	8404	TTATAACTGGCGCGATGCAATACAC
	563	5	9587	TTTCGTCTGATATTCATTTGCAATT
	564	5	10882	TTTTTCACTCAAACCTGTTCACAAT
	565	5	12031	TAAACCATACACTATCAAGCAATAT
	566	5	13307	ACACTTCTTGCACACTATGGTTGAA
	567	5	14294	GCAAAGGTTCAAAGTTCTCAAAGAA
	568	5	15466	ATAATAGTAGAGTTGAACCTAGTTG
	569	5	18950	TGCAGGGCGTTTGAGAAATAAGGGA
	570	5	19213	CATTATATAGACTTTTCGCACACAC
	571	5	24894	CCTTACAGAACTTGATCTTTCACAG
	572	5	26041	CTTTCGCCTGATAATATGAAAAAGT
	573	5	26667	TGAAAAAGACCCCAGACCCATCTCC
	574	5	29249	TCTCCATTTACATTCATTACAACTT
	575	5	30644	TAGTGACCATTACAATTATGACATT
	576	5	31268	GGTCGAGATATTCTTTAATGGTTTA
	577	5	39169	GTGCAATTGTAACCTTTAATGAAAT
	578	5	43058	CCTCGCTCGTTGAAGTTCTTCTATA
	579	5	46317	ATTGTCGTGTTCATTCTCTCTTTAA
	580	5	47077	TACTATGCCTCTAATACTTCTGCCT
	581	5	51800	TAATATTTTGATAGTTTTTACCGCA
	582	5	52081	ATTAACAAGTGTTTACGAACTAATG
	583	5	63348	CGAACACTCATATCATATTACTTCG
	584	5	73653	TGGTTTTAAGGAGAAAGCACTAATA
	585	5	75579	ACTGGAAGAGTTATCTGTTAGGACC
	586	5	79531	AATATAGACTTTTTATTCGCATGCA
	587	5	81352	GCAACATTGTCGAGAATAAGTGAAG
	588	5	84230	ATGTCATGGTATTCAGATGGTTAAA
	589	5	89938	TTAGTTCATTAATTGTTATTCGTGT
	590	5	91699	TGATGTTTGTTGTTTCGATAAAACT
	591	5	94663	CTTTAAAGCACATAATATACTTCGT
	592	5	99291	TATAGGTTAGATGGATATTGGAGTA
	593	5	117055	TCGGTCGTAATGATTTCTATAATGA
	594	5	118200	TATCAATGTGGGTCGTTAACATATC
	595	5	141046	AGTCTTCTACGTATGCAATGATCTG
	596	5	154379	GGTAAAGTGCAGGAGTATTTCAAAT
	597	5	164496	TAAAATGCAAAACGAATTTCAGAGA
	598	5	166072	CCCATCGTAATCACAGTATATAGTT
	599	5	168915	CATCTGGATCATTGAAATGTTTAAT
	600	5	169444	TAGTCCGGAAATTTCTCTTAGATTA
	601	5	172768	GTCTCTTGAACAGGAATGCGTACTA
	602	5	178712	TAGGGCTACGATAGTACTTTTGAGA
	603	5	187918	TTGCCTAGAACAATAAAGAAAAGTC
	604	5	200723	TAACTATTGTAACGCACTCATTCAC
	605	5	203206	CGAATCACAAGAAGAAACTACCAAT
	606	5	207165	AACCTTTATCGTCTAGTTACACCAG
	607	5	208835	CGTATATACATTCCAACCCATATAT
	608	5	210975	ATCATACGTAACAGAAGTGAGTGAT
	609	5	212421	TACACCCTAAAATCCCACACAGGGA
	610	5	216708	AATGGGTCCTTCCTCCAAGAAATCT
	611	5	217273	CAAATAGACACGATTTGGATTTTAA
	612	5	219261	ATTATTCCTTTTGAGAGAGAAACTA
	613	5	221790	TATTCTACTTAAAACGAGCAAAACA
	614	5	223145	ATTTAGGTCGGATTATTCATAAAGA
	615	5	226846	ATCATGACTGTTACCTGATTTTAGA
	616	5	229248	TCCTGTTCAAAGATCAAAAATTAGC
	617	5	232342	GAATAATTTAACTAGCTTTTGACTG
	618	5	234396	AAACAGCCAAAGCGTTTTAGATAGT
	619	5	237386	AGGTAGGGATACTTACAGAAATGAA
	620	5	238701	GACACCGCTTATTACACTGTAAAAG
	621	5	241785	AGAAAATGGTGCCCTAAATATCTTT
	622	5	242340	TTACACAACCCTTAGTAAACAGCTG
	623	5	244393	AACAAATATTATAGAAGGTGACAAT
	624	5	244636	GACAACTGCTTCCTTCAAAGAATAT
	625	5	246287	TCTATCAATGTCTGTTTGAATAGTA
	626	5	248404	CAGGGTCTAAAACAATCCATAGGAG
	627	5	249913	TTACGGCTAAATTTATGTTGTATTA
	628	5	251260	ACCCACATGGGACTATAAGAGGAGA
	629	5	253902	AGACAGAACTATGAAATGCCTTATT
	630	5	256024	AATTCAATCACTTCATGCATACGTT
	631	5	258475	TATCGAAACTACCTTATAAATGTGT
	632	5	259969	GAATGAGATTGTGAAATGCAACCCA
	633	5	261282	GGATATAGGCTACCACATAAAAGAA
	634	5	265864	AAGTTTAGACGGTAAATACTTGCAG
	635	5	266959	CGGATAAAGCAACAGTATACATATT
	636	5	269052	CGAAAGCTTCTGGCATAATGTTTGG
	637	5	275169	AGTTATTATCGGTGCTACTGTAATT
	638	5	276201	AATGGCTCTAGTATGCAAATCATTA
	639	5	283512	AATAAAGTCGTATTCTTGTTCACTT
	640	5	284169	TTTATGGCTACCTTCCAAATGAATT
	641	5	286950	CTCTCAATTGTTAGGTATTTGGGTG
	642	5	287658	TCAAATTTGGAGTGAAACACGTATG
	643	5	291249	AATCTGTCAAGAGTACCGAAGTAAA
	644	5	296700	TTGAATAACGTCACAGATAATGTAT
	645	5	303351	TACTCATTACGTTTTTGGATATCAA
	646	5	309149	ACTATTTTGTGTTCCCATAGTATTT
	647	5	311710	GGGTCTGGTCTGGTTAGATATTAGA
	648	5	313473	GGTATAGTATCCTGAGGTCATTTTT
	649	5	314322	TACTGATGATACTTAAGACGTGCCA
	650	5	318977	TCAGTCCATTTACACTAATAACAGG
	651	5	321759	TTGATCAACTATTAAATTCCGGCAG
	652	5	332059	AAATTATCGCATGCCATGGGTATAC
	653	5	357862	TGTATTTCACTTCACCTACTGTAAT
	654	5	360226	GGCAAAGAACCTAATGATAGTTCTT
	655	5	362318	CGAAACATCTTGACATCCAAGAAAT
	656	5	368996	ACACATTTATGCGTTTGTCATAAAA
	657	6	8181	TTCATTTTGAAGTGCTCAGGAGAAA
	658	6	15963	TGTACGCACATTTTAAACTCGACAA
	659	6	16759	GCTTTTTGTCGAAGTAGTGTAGCGT
	660	6	18000	TTAATGCCTTCATTTTGATAACTTG
	661	6	18801	CGTACAATGAAACTATGATTAAGTC
	662	6	19961	CTCGTTTGGCCACATTATCAAAAGG
	663	6	20762	GCTCCCGGATGTAGTATGTCGTCAA
	664	6	22900	AAGACTAGGTAAAGCTCAAACAACG
	665	6	25954	ACTTTTTGACTAATCTCTGAAATCA
	666	6	28526	ATGATCTTTACGAACTTTTAGAGAA
	667	6	29680	CAGTTGAAGAGGCTAATAGCATCTA
	668	6	30350	AGTATTCATAGCCCATATATTCAGG
	669	6	31513	AGGAACGTGATGTAATGCATTTTTT
	670	6	32870	TGGTTTTACTTCGTACTTCTGATCA
	671	6	35896	GGTGATTAAAATATATTCCTGTCGA
	672	6	36516	CAGCTGATATATTTGTCGTATCTAA
	673	6	38573	TAAAGAACACAAATGCTAATCCAGT
	674	6	40318	ATACCAAGACGTAATGACAATAATA
	675	6	44755	GGGCCTTATGAGTGTTGAAGGAATA
	676	6	45753	AGTTGATGTAATGAGACAGCAATTG
	677	6	52721	TAATATTTGGATCTTTGACATTCTT
	678	6	58311	GCAGTACGTTGCTTGTTATTCCTTC
	679	6	60220	TCAGATAAGAAAGGCTTGAATAAAG
	680	6	61680	GAATCTGGTTCCAAGCGATAAACCA
	681	6	63001	ATTGTGTTCACCTCTAATTATAAAT
	682	6	68726	ATAGACACATTCATAGGTTAAATAG
	683	6	70807	TTGAATGACTCCTGATAGAATTTTC
	684	6	71941	TGATTTCCTTAGAACCTTTATAGCA
	685	6	73217	TGATCATCATTGAGAAAAAATCTTG
	686	6	79741	ACTCTTCTCTTTTGTCCATCACTTA
	687	6	83080	GATATCTTTCACTTTAGGGATTGCT
	688	6	85388	ATCTTGGTTTCTAATTTGTACGATA
	689	6	89159	TTGTGGTTAATCAAGTCATCGTCTT
	690	6	98261	AACACTAAGGAGTTTCCCGCTGTGT
	691	6	100736	GATATGAGATGGAAGGAAATTTAAT
	692	6	103351	ATTCTAAAAACGAGTCATCATTAAA
	693	6	103736	ATTGCTGAATATAAATGGATCTAGG
	694	6	107701	GTGGAATATATAAACTTAAGTACGC
	695	6	120531	AATCTGCTAGAAACTATGACAAATT
	696	6	122125	ATTAAATTCCAGCGAAGATATTCTA
	697	6	124890	ATAGGTTACAAGGCCATCTTAGAAC
	698	6	132653	GACAATGAGCATTTTGAATTATATA
	699	6	143947	CTGAAACAAACAAAGACGTATAGTC
	700	6	144748	CCATCTACTCACACTCAATTTTAAT
	701	6	148680	TAGAATTTAAGGCTCTACACACGTT
	702	6	151074	GAATAAGGCGAATATCAAAAAAGTA
	703	6	152692	AATCTGGTTGGATTTCATAAGCATT
	704	6	167242	TGAACCCATGATTGACTCTGTATTA
	705	6	168332	GTTACTTTGCATGCACCGTGATCCT
	706	6	181203	TTTAGTAGGTCTGAAGTCTTGTTTA
	707	6	183443	TTGAGCAGCTGATATTCTTGATGTG
	708	6	189812	TAAATTCTAAGCCAGTAGTAAAGGA
	709	6	191821	TTCCCCTTTCATTGTTGACATAATG
	710	6	193004	GATCTTCGGAGATGTATAGATATGC
	711	6	194158	TATCCGAATGCATAAATTAGACTAG
	712	6	195892	AACCATATGTGGATGCATCAAGAAA
	713	6	203599	TAAAATGAGCAGTCAATTCAATCAA
	714	6	203818	TCAAGGTAGCAAATATACTCTAATT
	715	6	204740	CCTCGAGGATTTTTACTGAATTGTA
	716	6	205010	GAAATGATACAGGTTTACTTTACAG
	717	6	205904	CTCCTATTATCCGATGAGCTACCCA
	718	6	206686	CAATTGCCAGTATGTGTTCATATCT
	719	6	207830	CGGAGATAATGACACTAGTGAATAA
	720	6	226159	AGCATAGGAAATACTTGCACACAGA
	721	6	228481	TTGATTGTGAGATTAACGGGAAATT
	722	6	229316	TATCATAGAAAAGAGTAACGGATTA
	723	6	231617	TTATCCAGATGGGAAAATTCAATAA
	724	6	232596	TTGATTTTTGAATCTAGAAACACTA
	725	6	234568	CTAAAACTGATTTAGATGAGGAGGA
	726	6	245474	GTTTCCATCTCATTAGTCCCAAATG
	727	6	258527	TTCTAGTTGCCCTTTCACTATACAA
	728	7	2265	TTTTATTAAAGAGAGTGCAGAGAAT
	729	7	19180	GCGCTACTGTAAATAGATTGTTCCT
	730	7	20752	TGAGACAGATGAACATATTTGACCT
	731	7	20921	AAAAAAACTGCAAGTATAGACAATA
	732	7	21572	AGTATTATGAAGATTCAGACGCTAC
	733	7	22000	TTTATATTCAATCCTCAAAGAACAA
	734	7	29347	CTAACCCACCTAACTCATATTGAAT
	735	7	33375	TAACATTGAGAATGACAACAAAGAA
	736	7	34284	TGAAACCCAAGAATTTGATGAAAAT
	737	7	51724	TTTTTCAAAGATTGATCGCATCAAA
	738	7	75249	ACTTGAATTCGTTTATGAGGAATAA
	739	7	75337	TATCATTTCTGCAATTCCTCGTAGA
	740	7	93370	TTGGCATTAAAGGCTAAAAAATCTA
	741	7	106935	ACGTTGTTTTGAGAATAATTGAATT
	742	7	108541	TATATTCGATAAGAGATTGTCACTT
	743	7	110795	ACATCATGATGATTGTGTGGATTCT
	744	7	110846	AATAAGGCAATATGTTGGAACGAGA
	745	7	117810	GAACGATACTTGAAACGAAATATGA
	746	7	117814	GATACTTGAAACGAAATATGAAAAT
	747	7	122378	TCCCTTCTAAGAGTCCCACATAAAA
	748	7	127814	CAGTTGCTCTTGATTTATTAGTAAT
	749	7	131387	GCTTCTCAATAAAGTCGTTACGTAC
	750	7	137373	CCAATCTACCATCGTTAACATTATT
	751	7	140261	TAAGGCCTTAACACTCTACATAATA
	752	7	147686	CGTGGAAAGTTCTCTAACGTAATAG
	753	7	148891	TGTCACTATTACTTTCTCCCAATTC
	754	7	149294	TTAAAAAAAGAAATCAGTATGTATG
	755	7	150205	ATCAAAATCGAAATGGGTGAGTATT
	756	7	150956	ACATACCATGAATCTACCTGCCAAT
	757	7	152338	ACCGGACTGCGGTCCCATGATCGAG
	758	7	153550	TAGTTTTGCATATATTGTTTCATCT
	759	7	154323	TCTTTTCCTTCTAAATCTGCTGTCA
	760	7	156055	TTTTGTTTTTAATGAACTGTAAGCA
	761	7	157960	TAAAGGAGTTGATTAATTCGTCCGA
	762	7	160940	TATTGCAATATTGAACCAGAGTTAA
	763	7	162932	TTTTCTTGAAATCCAGCTCTTTTAT
	764	7	165776	TAGTTAAAGCCTCAAGTGCATTGAT
	765	7	167431	CAACAAATAGCATAATAACCAAAAA
	766	7	171277	CATAAGGTCATTACATTTGGGTTTT
	767	7	172103	AATCACCATTTCTGTAACCTAAATA
	768	7	174014	TAGTGAACCTCTGCTGATTCTTTCT
	769	7	175889	ATTAGGATGCGTCATAAAACCTGGG
	770	7	177155	GGACACAATATAAGACGGATAATAT
	771	7	182390	CCACCATGGATATTTTTAGAGTATT
	772	7	184348	TCTGAATTTTTTCTCTGGAATAGAA
	773	7	185982	TTCTTCTGCGCTGTTAACTTACCAC
	774	7	187358	TAACTTTTGAAAATCATAACCACTG
	775	7	189376	GTTGACAGAGCCTAAAGTTTCGACA
	776	7	190026	GAACCAATTTATTCAACGCTTCTAG
	777	7	193458	AGATAATGAAAAATTTAAAAGCTAG
	778	7	193462	AATGAAAAATTTAAAAGCTAGCACA
	779	7	197936	TATTTTCCTTACTCATCTAAACTTC
	780	7	199177	TCATAAAAAGTATTGTGTGTATAGA
	781	7	200555	TTCCAATAAATATGAAAGAATCCCC
	782	7	201784	CTGATAAAAGATTACTCTGAATATG
	783	7	204928	CTCACGGTCTGTTGAATCTAAACTA
	784	7	204932	CGGTCTGTTGAATCTAAACTAACTA
	785	7	205155	GACAGTTATATACGTGAGCAATATA
	786	7	214751	GCGCTGTCTACCTTAGCTTTACTCT
	787	7	215900	TAGATTTGAACATCTATCGTGAAAC
	788	7	217443	TAATTGAAACAGTAATCTACAAATA
	789	7	218944	TTACCTACCCGTGATGATTTGTTTG
	790	7	220995	AAAAATTAGGCAGTATGATAACGAA
	791	7	221805	TGCATGTTATATTGCGTTATTGCTG
	792	7	222209	TTCATAATTAGTTGATGGGTTGAAA
	793	7	223262	ATTGACCCAGTTATGCAGAGTAGAA
	794	7	230207	AGTTATTGTTTATAAGCATAGTCAC
	795	7	231703	TTGTTAACAGCACAGAATCTAAAAA
	796	7	231711	AGCACAGAATCTAAAAAATACAATT
	797	7	232187	AATATTAAAGCTAAAGTATGATCCA
	798	7	240198	TAAAGATCCAAAGCACGAGTTATTT
	799	7	252791	ATCTTTAATGGATGGTAAACATATA
	800	7	273411	GATTGAACATTCTACCTACGGAATC
	801	7	275729	TAAATGGTAAGCATTGTAAAGAGTT
	802	7	286692	GGATATAATGATCCCGTTATCCAAT
	803	7	293241	TTTTGTAGTATTGTCTGTTGATACC
	804	7	293253	GTCTGTTGATACCAAAATAAATTAG
	805	7	295588	CTTTAGCGTAATAAACATGCTCTTC
	806	7	304210	ATTACATGAGGGAAAAAAATATACA
	807	7	307048	ATAACAGAGTCCTATCGACATAAAA
	808	7	316575	TCTCAAAAAAACTGTGTACTATTAT
	809	7	323432	GCGAGGAGTTACCAGACGACAACTA
	810	7	323594	GAGAAAAATTAAAAATGTGCCAAGA
	811	7	323769	CAGACCATAAAAACAACAGAAAGTC
	812	7	323863	AAAAGAACTATATTGATGGTCTGAC
	813	7	324209	CTTTCGCTCATGGCTTATTTTCCTT
	814	7	327417	TATTTAATTAGCAGCTGAAATTTTT
	815	7	352535	TTCTGGCTTTTCCAAGATTATGTGA
	816	7	354421	TATACTCAAGCCGCTATTTAATTAT
	817	7	355688	TAAATAAAGAAAGGATGAAACAGTC
	818	7	367729	GAATTCAAATTCATGCTTACGATAA
	819	7	369871	GAGTTATTATGGCAAGAGAATATGA
	820	7	370343	TAAGGCCCTATAAACAAAGATATCT
	821	7	370761	GACAAACACTAATTCCAATATGGAA
	822	7	372119	TATGTAGTCAACCATAATGAGGGTC
	823	7	390473	GCACTATATGGCCAAAAATACAGTA
	824	7	402842	ATTCTCTGGCATTTTAGTGATAGTT
	825	7	402846	TCTGGCATTTTAGTGATAGTTCTAA
	826	7	403004	TGATAACGATTTATGGAACACTCCC
	827	7	403325	GCACACAACTTGACAAAGGATCTAC
	828	7	403365	ACTAGTAGGTGTCAAATTTAGTGTC
	829	7	403433	CAAATAATGCAGTTGCCCCAAAAAC
	830	7	403635	ACAGAGACAATCAGGAATACTATAG
	831	7	403923	GCATACTACGCTTATCTTTCTCTTG
	832	7	405404	ATGAACGGTTGAAGTATTGTCATAC
	833	7	405424	CATACTGACGCTTCTGATTTTGAGA
	834	7	407444	ACCAGTTAATAAGTTCAAACAATAT
	835	7	408707	TTTGACACTTGCCCCTGATTTTCCA
	836	7	413718	TTGCTCTACTACCACTTTACTTAAT
	837	7	418280	CACCGATAGATTTACATGTGGTAAA
	838	7	428361	ACGTATGATTTTAGCAACGGAAGAC
	839	7	432919	GTCTGTGAAAAGCTCTATGACAGAT
	840	7	433674	TTGCTACCATCCTATAAACTGTATG
	841	7	437332	TGGGAGTATAATGATAGAGAAGTGG
	842	7	440872	AAATAACGTTTGAACTGACACTAAT
	843	7	470932	TGTAGAATTATAATAGCTGTAACAT
	844	7	474704	TCTAAGTTTGTTGTGATCTCCTGTT
	845	7	478779	TTAAGTTCTGCTGTTTAAATAAGTA
	846	7	482939	GAGAAATTAGATGTTAGACGATAAT
	847	7	485482	CCTTCCAAAAACATTCAAATAGTAT
	848	7	485581	ATAAATTGCAGGCTTAACGAAAAAT
	849	7	485587	TGCAGGCTTAACGAAAAATTAAATA
	850	7	485655	GGTTGGCACGATTCAATTGAGAAGG
	851	7	485663	CGATTCAATTGAGAAGGCTTAGGTT
	852	7	485901	CTGTGTGCGTAACAAAAAAAATAAT
	853	7	489100	CCAAGACTTGGGTAGAAACTATTAT
	854	7	490063	TCAATTCTCTCCTTAATCAACATTA
	855	7	559337	AAACTGAGTAGTTATTAAAGCCTAT
	856	7	560456	TATGTTTTCACTTTAAGACCTTAGA
	857	7	620281	GTACTAGCAAAGATTGAAGTAATGA
	858	7	627885	CAACCCCTACTCAGTTGTTCTCCGG
	859	7	628622	ATTAAATTCAAACAGACCATCAAAT
	860	7	630814	TAAGATCTGCATTGGTTGTAAAAAA
	861	7	631577	CAACTTGGTACTGAAGTCTTGATTA
	862	7	633905	GCCGTCTTTTTCTATAAGTTCTATA
	863	7	637595	TGCACTAGTTGGTTTTCCTATTCTG
	864	7	639752	TTGGATTTAAATTTACAGACACATT
	865	7	643726	TTTGACTATTTCTTGCACTTACTTT
	866	7	645949	GATGGATCCCACGATTTTATAGTGT
	867	7	647533	CTGCATCTTTATAGTCTTTCAACCT
	868	7	649183	TACCAATTAGACGGTTCTGTGCTTG
	869	7	658270	TTCCCCTTCCAATGACAAGTATACT
	870	7	670248	TAATTACAAATTGGACTGATACTAC
	871	7	670276	GCTAGATGTACAAAAAACGCAAGGT
	872	7	675388	AAACAAAGGCTAATACACAGGCCAA
	873	7	677703	TCTTCCTCTAATAACAAAAAATCGA
	874	7	683117	TCATACTAATGTTGTCCTCAATAGT
	875	7	687219	ATCCTCAATGGCTAAGTCTATGTTA
	876	7	696974	GAAGCACAAGGTATCAAATATTCTG
	877	7	697434	CCAGGTGCCAATGATTATATTAGAA
	878	7	699290	TCTTCCAAAAACGATAAGCAAGAAT
	879	7	700642	TGCGTTTGCTTTATTCCCTTACCCA
	880	7	700651	TTTATTCCCTTACCCAACAGATGAA
	881	7	706323	TGTAAAGAATCGATTTTGTTACTGT
	882	7	712714	CGTGATAAAATTATTGTCAGAATAG
	883	7	718548	CCATACTATCGAACTCTATCCAAGA
	884	7	719958	CCTCACAAAATATATCGCTAGCATG
	885	7	725045	AAATAATTTACTGTGCATTTCTGAT
	886	7	730219	GACGAGATGCCGTAATCAACTTATA
	887	7	731074	TGTACTCAAATAATTAAAATGTTGA
	888	7	734615	TTATGAATTATTTACAGAGTTTGAC
	889	7	734619	GAATTATTTACAGAGTTTGACCTAT
	890	7	734769	ATCCTCAACCGATATTACAAAGAAG
	891	7	735827	TTACCGATAATTGAATCCTAACAGT
	892	7	736440	CTGAAGGGAATAATGTTGTTCAACA
	893	7	739063	TGAAAATACTACTCTTTACACCTGT
	894	7	742065	ATTAATGTTCTATTTCTTGAGGTGA
	895	7	742967	AGTGTTAGGTTTGCTTTTGAACATT
	896	7	745743	TAATATACTACCACAACAATTCACA
	897	7	749685	TTCCAGTGCCTTAGTGATAACATTT
	898	7	757342	CTCCACTTGACGTAGACATTGGTAA
	899	7	764967	ATTAAAGAACATGATAAAATAGCGG
	900	7	765281	CTTTGTTCTAGTACGAGATAAGGCA
	901	7	779832	TGTGGCGTCAAGAATTACAAGAAGC
	902	7	783979	TGCGTGATACAGTTTACATTATAGA
	903	7	796292	TGGACTTAAATGCCTTGAATGAAAA
	904	7	808060	TGTAAGTATTGCCCAGTAAGTTTTC
	905	7	808354	GTCATCTCCAGTAAGGCTTAAATGT
	906	7	808358	TCTCCAGTAAGGCTTAAATGTATAT
	907	8	58658	CCTCCAATAAATGTAAGCCAATCAC
	908	8	64340	ACTGACGGCTTCTTAAAATAAATAT
	909	8	73677	TTAATCCCACCAAATAGAGTATAAA
	910	8	73721	TAAAAAACATGATGCGATAGTGTTC
	911	8	74455	ATGAGTTACACCTTTCCCATAGGTA
	912	8	74720	ACCTTTGGTCTTGGCTAATCTCAAA
	913	8	74744	AATTAAAGTTCATATCTACCGTATG
	914	8	80054	ACCCCTAAGAACATGTAAGGACTTG
	915	8	84809	AGGGAAAGATATGTTGTTCTGTAAT
	916	8	84952	CTTGGAATAGACTATTTCTGATACA
	917	8	92110	TTTATTCCAACAATTTATACGCTTG
	918	8	92298	ATGACGTAAAAAGATGTAGCAAAGA
	919	8	93012	ATTATTTTTTCTAGCCTGGTACCTG
	920	8	93310	TACGGTGCCTGTTAATAGATTTGAT
	921	8	93318	CTGTTAATAGATTTGATCGAGTGAT
	922	8	93322	TAATAGATTTGATCGAGTGATTGTG
	923	8	93383	TGTCGTAGAGTTACTTTTAGGTATG
	924	8	93467	TGAAGGTATGGATCGAAGCGAATTT
	925	8	93602	GTCACACTCATTTTTTTGTATTCTT
	926	8	93875	ATGTGTAAATCCGATACCAATAAAG
	927	8	93879	GTAAATCCGATACCAATAAAGTCAA
	928	8	93927	AACTTCACATGAATAGGTTTTGCCA
	929	8	94005	AAAAAGGTTTGGACGAATGAATATG
	930	8	94045	TGATTTGCCGTGAGCCTATTATCCA
	931	8	94065	ATCCAAAGCTTCTGAGAACTAATAC
	932	8	94105	AAAGATATGAAACAAAAAGTGAGCC
	933	8	94264	ATAGTCCCATGGCGAAATTAACACC
	934	8	94380	AGAACGCCACCAAGTATGGAATTTA
	935	8	94460	TAATGCAGTTTCATGTGGTGTAAGA
	936	8	94525	GAAAATCCTTTCCGTCACTGTTCCA
	937	8	94613	GAGAGAGGATGTTATATCGGTAGGA
	938	8	94687	AACAAGAACTGACTCCCATGGTATT
	939	8	94766	GCACTAAGGACAATATTACGGATAT
	940	8	94814	CCTTCGTTACATAGAACGCAGACAG
	941	8	94862	ACTCGATGAGACTTTGTTATTTTTA
	942	8	94886	ATACGCCTGAAATTAGGAAGAATTT
	943	8	94963	TTAAATTTCGTTAATGAAGTTGTGA
	944	8	95308	GCTATCTCCGTGATATATTCATCAT
	945	8	98503	AATCCATAGACGAGTACATTAGAGT
	946	8	100884	CTGTTAAGACTGACCATAATATTCT
	947	8	101227	CGGATTGGTTATAACAGGATATGTT
	948	8	104592	AAACAACAGTGAAATTTCTACATAT
	949	8	105511	GCTTGTGAAATAAACATCAATAATC
	950	8	121713	CTGCTGCAATTGTGAAGGAAAAAAA
	951	8	123594	TTTTAGGAGGTATAGTTATCAATTG
	952	8	125757	TGAGTGACTTGAACTATCAAACAGA
	953	8	126126	GCTGTTGCACCTACACTGTTTTTTT
	954	8	126777	AGCGAAACTAACGATTATTCATATT
	955	8	127725	TGTAATACGTTTTACAGACACTGAA
	956	8	130505	TTCTTGCAGACGAGATAGATGTAAT
	957	8	130555	ACATATATAAAAAAAGAAAGCTTGC
	958	8	130635	GTGTTTAGAACCGTGCTCAAAAAGA
	959	8	131629	GCAATACTACTAAAGCAAGCGCTTT
	960	8	134165	AGTAGCGTGAGTACTAATAAACGGA
	961	8	139384	TTGACTGCGGACCTGAACTTAGTCC
	962	8	141666	GATATGATGGAGCCTTGGCAGATCA
	963	8	142275	AATATCGTCACCAAATTTAAAGTCT
	964	8	146647	ATTTTGAGATACAACAGAATGAGTG
	965	8	146651	TGAGATACAACAGAATGAGTGGTAT
	966	8	147541	ATATCTGCACTTTTATGGTCATTAC
	967	8	147824	AAGAAGATGATTTTAACTACACAAA
	968	8	149358	GAGTGGTAGCGTTTTTAGCCAAGCA
	969	8	176410	AGTTCTTAGCTAATGACAACAAACA
	970	8	177596	CGCAGTTGGATATCATCGCATATCC
	971	8	178117	AAAAATATCAAGAGTAAAAATAGTG
	972	8	179236	TGTCATTCAAAGATAATGACCGCAA
	973	8	181824	ACAAAAATTGGATAGGCCTACTATA
	974	8	183892	CTTACTTATTCACGTTGCTATTTAT
	975	8	185521	AAATGATCAATATCAGACCCTTGGC
	976	8	186986	TTTTGATTATACTACTACTCGTTTA
	977	8	188828	GCCCACTTGAGCATACGAGTACACT
	978	8	192725	ACGCAGTTCAACTTTTGCTTTTACA
	979	8	202016	CGTGTTTTAAATGTTTTCATCCACA
	980	8	202845	AAATGCACTTACCATCAACAAAAAA
	981	8	203180	CCAAAAGCAGAAGTATTGTGTACAA
	982	8	203281	CTTTGTGGCTCAACGAAGAGGGCTA
	983	8	203429	GCTGACCGTAATACTAGACAAGGAA
	984	8	205262	ACCATCAAAGTTATAAATGGACATT
	985	8	211024	GTAAGAAAAACCTATTGGAAGATGA
	986	8	214235	AGCAGCGGGTACCATGAATAGCTTT
	987	8	216321	TTTATCTGGAAGCTTAACAGACAGC
	988	8	217518	GGGTTGAACGAGAAGTTGAATGCCT
	989	8	218176	TACATACTGAAATTGATATCTATGT
	990	8	220138	CCTCTATTCTTAAGGAGTTCGCTGG
	991	8	225208	CTCCTATCGATCGTAACATACAAAG
	992	8	227205	AACCTCTTGTATAGGCGAGCTGACT
	993	8	227997	ACTAAACTCGAGCAAATTACATAAT
	994	8	228342	TTCATCCATAACCAAGAATTTCAGT
	995	8	231143	TTTTAACTATCAAAATCCTGCAAGT
	996	8	233534	GCTGTGTAGTTTATAAATGTGTAAA
	997	8	236804	TTTTCCTAGGTTCGATATAGTTATA
	998	8	237950	TTGAAATTCTGATGTTAAAAAGATA
	999	8	238727	ACATTTCTGAATCCTAATGCATGAC
	1000	8	238795	AAATGGGAACCATGATAATTTCTAG
	1001	8	242255	TAGGCTACCGCTACATTAATAACTG
	1002	8	244944	TTAAGACAACTGGAGAACTATTTGA
	1003	8	245711	ATTCTTGATCAATCTTTCACACTAA
	1004	8	246174	TTTTGACTCCCTGCCAGTAATGTCA
	1005	8	248372	TCCACGAGTTCATATATTCTGTTAT
	1006	8	251782	GGAGTCTTCAGAGATTCTAAACTTG
	1007	8	252305	ATTTAATAGAGCCAAACATAAGTGG
	1008	8	253988	TTCTAAGGCGCTTTTCATGTTCATG
	1009	8	255639	TGTTGATACATAATTGTTACCGTAG
	1010	8	256006	TCCTCATGCCCTAAGAAATATTCAA
	1011	8	256372	ATCGTATTTATAGTGCTTTCCGTAT
	1012	8	258410	TGATGATATTTATTCCTAAGTGCTC
	1013	8	263046	TCTTAGATGATATGGCGTTTTCATA
	1014	8	263229	GTTTTTGAGGACTCAGCAATTTGTT
	1015	8	264516	CAACCCGCCCTAACGAAGCGTGTAT
	1016	8	267459	AAAACTGGTTAACAGCCTACAGTAG
	1017	8	270256	TTTTTTAAAGAAGCCGCTTGCAACA
	1018	8	273212	AAGTTAAGTGGTTCGATAGTCACTC
	1019	8	276696	CGATGTTCATAATAGTTAAAAGTTG
	1020	8	278192	AATCTGGTAAGAAACGACTCATCTC
	1021	8	279878	AAGATTCCATGTCCTTTTATTAAGT
	1022	8	283571	ATATGCAGGAATCATATCTTAGTTT
	1023	8	283944	GACAGAAGCAGTATAAAGTTTTGTC
	1024	8	284650	ATAAACTTGCATATCCTTCTTCTTT
	1025	8	286229	ACTTTTTTCTGATGACGAGATTTTT
	1026	8	289016	ACTAATTGACTTGAAGATTATTTTA
	1027	8	290523	CTGTTAATGGAAATTATTGCTAGTA
	1028	8	291228	TAGACATACACTTGGATTTGACTCT
	1029	8	293464	TCTGCTTGAACCAATAAGCCCTAGA
	1030	8	294191	GTAGTATGAAGGATAATACGGTAAA
	1031	8	296566	TATAGAAAAATTATTCAATCGACTT
	1032	8	297277	TTTGCGTATAGAAAAGTAACCAATA
	1033	8	298381	TCTCAATCGATTTTGAAAGGAGAAA
	1034	8	299716	AATTTGTGGATAAAGTTTGTAGCAA
	1035	8	300019	TATTCTCATGACAGGATTTTGATTT
	1036	8	300027	TGACAGGATTTTGATTTATAAACTT
	1037	8	301011	CTAACAATGAAACATCAATCAAAAA
	1038	8	302221	GCCACTAATCAACTCCTTCAGATAG
	1039	8	304446	ACATAAAAAACTACGCACCTATATT
	1040	8	304452	AAAACTACGCACCTATATTATTACT
	1041	8	304456	CTACGCACCTATATTATTACTACCC
	1042	8	308726	TTGATAAGCCACCCTGATTTATTTT
	1043	8	309205	ATTTCAAGATCTCGATTCCGAAAAT
	1044	8	315466	CAACACCTGGTCTACGTTACAATAC
	1045	8	376481	GTTGAAGATGATCCCTACGGTTATC
	1046	8	388501	GCGTCGATAGAAAGATGAACAAAAA
	1047	8	393005	TATCTTCTGAATTCTGAACTGTAAC
	1048	8	393013	GAATTCTGAACTGTAACATTTATTT
	1049	8	396986	GTCAGGGCTACTAAATAATTGAACG
	1050	8	396991	GGCTACTAAATAATTGAACGAGGTC
	1051	8	402977	CACTTCTGTTTGAGCAGCTAAATTT
	1052	8	402981	TCTGTTTGAGCAGCTAAATTTTTTA
	1053	8	445640	TTATTTTACGATGCTACTTAGATAA
	1054	8	450755	TTTACTCTATAGTACCTCCTCGCTC
	1055	8	466286	ATTTTGGTGAAATAATGAATCTTAA
	1056	8	466462	CGGTTTTATTCAGACCCTTACATCA
	1057	8	466857	TCTCATTCTCGCATTCCAACAGTTA
	1058	8	466861	ATTCTCGCATTCCAACAGTTATGTT
	1059	8	466953	ATCTTATTTTGAGATACAACATAGT
	1060	8	469077	TTACTCTAGCAAAGTTTCTCAGTTT
	1061	8	506124	TTAGTACATTTGGTATAGACTGATA
	1062	8	522577	GCAATAGTTTAGTGTTATCATGTCA
	1063	8	525047	GCGTAGATCGCTTAACCTCTAAAGG
	1064	8	529653	TTGCTTGACCTCTTCATTTTTTATA
	1065	8	556477	TGCCATAGGATAATTAAAGGTGAGT
	1066	9	45971	GTAGTTGTGGAGCTTATATAAAGAA
	1067	9	47640	TTCTTTCTCTCCACAATGATCAAAA
	1068	9	48869	AGAAATAACCGCAGATAGATCAGTA
	1069	9	55057	TACTCACCCTTTCCATAGTCTCTTG
	1070	9	65509	TCCTTATCCAGGTTCTCTATTTCTG
	1071	9	65837	ATTGTTCGAAATCTCTAGTTAAAGA
	1072	9	72322	AAGGCCTCTCCCCTCTGTAATTAAT
	1073	9	77684	ATTCACCGTACTATGTGCCAGATGG
	1074	9	82604	AAACTCTCCAGAATGATCCTACCGT
	1075	9	85662	TATTTCAATGTAATACTCGAGGGTA
	1076	9	86570	TAATTTAACATTAGCTGGAGAAGTG
	1077	9	89149	AATAATAAAATCATCACCTCCGTTG
	1078	9	91092	TTACTAAGATAGGATAATCGAACTT
	1079	9	96848	ACCTTCAGGAGGTTACGATCAAGTA
	1080	9	99744	TAGGCCGAAGTATCATGAAAATAAT
	1081	9	102182	GTATACGAACTATACTTACCACTAA
	1082	9	113507	TATACTCTAGGTGACCTCAATGAGT
	1083	9	123163	CGGAATTGACTCTAGACTACTACGG
	1084	9	125433	ACTGCTTTCTTAAAGATTGAACAGC
	1085	9	130525	AAACATTTCAAGAGTCCCACGATTA
	1086	9	131870	TTTTGGATTCAGTCTGCTTAACTGT
	1087	9	134321	TGCTTAAAAAAAGTGATAATCTCTT
	1088	9	138971	TAATGCTTCTGTGTTTAAAAGACTC
	1089	9	140941	ATAGCCTTGTTTTGTATAAGATATC
	1090	9	148493	GATATGATCTCTCAGTAATTGTAAT
	1091	9	149968	AAAAATCGTAGTGCCATCGTAGGTA
	1092	9	156005	AGGACAATCAGAACCGAAGTGTTGT
	1093	9	158897	AAATTTGTGATTAAATTAGATTGGA
	1094	9	160446	ATAGACTGCATTAAGCTGAAAAACT
	1095	9	163061	ATACGTAGATATTCTTCATTTGCAT
	1096	9	163153	GCGTCGAACAATATACCTTAAAGAA
	1097	9	164868	CTTCTCTTTCTGATTCTAGCCAGAA
	1098	9	166164	TATCCCACTCGTATAATATGACAAA
	1099	9	167620	GGAACTTGATCTTGTAATTCAGAAT
	1100	9	168338	ATTCAAATTGTGGGTCAACGTTGAA
	1101	9	171498	TCATTATAGTTCAGAAGTGATGGTA
	1102	9	174672	CCTGCGATAGGGTTAGTTGTGTAAG
	1103	9	175739	GGAGAAGAAGTTTGAGAGGTGTATG
	1104	9	181412	CTATGACAAGAGTTCCTTAATAAAT
	1105	9	188856	ATTTTCTTAGACTTTTGTGCAGTAT
	1106	9	191615	TTTTCTGATCCTATTACCTTGTGAT
	1107	9	194569	GATAAACTCATTAGCATTCTATCAT
	1108	9	195063	TTGAAGCTGATGCATTGTCAAAAGA
	1109	9	197932	CTTCATCTGAACGGTTGAATACAGT
	1110	9	199219	TGGAACATTTCGATAGCACAAAGAG
	1111	9	200306	ATAGTAGCTACATTGCCATCAAAAC
	1112	9	201541	ATGAATTACGAACCTTAGCAGGAAA
	1113	9	202885	TTTTGCTCTATAGACGAATACAGTC
	1114	9	204730	AATTGTCTTAGCCTCTTATACAGAT
	1115	9	205763	ATCTCCGAAATAATGCTAAACATGT
	1116	9	205935	AACATTTCTATAAGCCACCAGATAT
	1117	9	206372	CATCGAAACAGGAGAAATAACAACG
	1118	9	207582	ATTGTTCCCTCAAAGTCGCCCTGCA
	1119	9	209440	ACAAATACCAAGAACTCACGAAAAG
	1120	9	210168	AAGACGTAGACCCAACACTTTCAGT
	1121	9	212292	GACTCTTACCTTGTGATATGTATAA
	1122	9	215976	CTGCTCCTTAAAACGAAAATCATAT
	1123	9	216309	CAATAGTTGCTAAAATGGAATTCAG
	1124	9	246532	AATTCACCAACTCTTCACATACATA
	1125	9	247471	TCTTCACTCGATGACCAAGCCGTGT
	1126	9	253180	ATCTGCATATTAGGTACCGTTCCCG
	1127	9	256080	AATCAAGCTGGTTTAGAGAATTTAA
	1128	9	256868	TGATCTGGTTCTTCCTATTTCTAAG
	1129	9	260006	GTCCTTGTTCTATTCAGTATTATGC
	1130	9	266704	TTCCTGTCCTTAGGCGAATTGGTCA
	1131	9	268168	ATGATGGTGATAACGATTTTGAACA
	1132	9	272654	ATAATGATTCGGCAAACTATAAAAT
	1133	9	273533	AGTGATTTTCCTCTGTTTCAATTCA
	1134	9	275118	GAGTAGTGCAGTCTTAGAAGGGCCT
	1135	9	275486	ATACCTCTGTCATAATATACTCCAG
	1136	9	278871	AAAAGGTATATTAGCAGAATTTTCA
	1137	9	285899	AAATACATGATTATACTACTTCCAA
	1138	9	288073	TGTGTTACTCGTTCCATGGAAAAAT
	1139	9	289580	AAGAAGGAGATGTTGTAACTTCAAA
	1140	9	292297	CACGTATGGCTTGTTTCATTTATTA
	1141	9	295362	TAGGAGTGAATTCTGAAAGTAAAAA
	1142	9	300639	CAGCTTCTCATAATTTACGCCATCC
	1143	9	301635	TTAATGATCCTTGTTTTATGCCAGT
	1144	9	302256	CGTATGGTGAATTGGTCTAATCCAC
	1145	9	308351	TTTAAATTGATCTTCCTCTTTTACA
	1146	9	310512	TTTACTGTTCTATGGAAAGGGAATG
	1147	9	319652	GTATTCTAAATGATTCAACAACAAT
	1148	9	325631	TAATTTGTGCATAGCTACTTGTAAG
	1149	9	331648	AAAATGGGTTAAACACTCCTCCATG
	1150	9	335012	CGCTAATCAAGCAGTAGTTCAAGAG
	1151	9	337928	GATTAAGAATAAACGGTGACTAGCA
	1152	9	338027	TAGTAATCCCGATGGAAGGAAAGAG
	1153	9	340800	TGTTAAGGACCTAGGTTATTATGCA
	1154	9	362705	CAGACGAACGCCGTAGGTAATAGAA
	1155	9	375196	TATAAGACAGCTTACTATATGATGA
	1156	9	378374	TTTCTGGCAAAATTTTCACTATGAA
	1157	9	386794	GATTTCTAATGTTACATGTCACGTC
	1158	9	387671	TAAATCAAGTATGTCATTTCAGGAA
	1159	9	388436	ACTACCTCTTTCTTACCGGATCTTG
	1160	9	392753	TGCATGTCTTAGATGTGGTAGTTTT
	1161	9	393165	TCCCCATTGCCAGGAGCTTGCATAT
	1162	9	393726	CAACATGACGAGGGATAATAACTGA
	1163	9	396287	ATCTCCGTTTTATTTGCTTCCAAAG
	1164	9	397049	GTTAGAATCTTTTGAATGAATGTCT
	1165	9	397290	ATGTCTCCGAAGAATATAACAAGGT
	1166	9	399362	TGAGAATTATTGAAAAAGGAGCTCC
	1167	9	401253	CTCTGAATTCGCCCACTATTTTAAA
	1168	9	403496	ACACCTTTTACGTATGACTTGTCTT
	1169	9	424425	CAAGGTTCAAATGGTCTAATAACCA
	1170	9	426330	TCACTTTCTATATCGTTCTCTACAC
	1171	9	427202	ACTATTTATGAAGGCACACCAAACT
	1172	9	428569	CAATGTAGGAGAGGCCTTTTAACAA
	1173	9	429486	AAATAGCAAAATGACGAATAATATC
	1174	9	431990	TATAATATCAGCCAACTTTTGAACA
	1175	9	432205	TGAAAAACCCTATTCCAAGATCATA
	1176	9	434310	TACGAATGAGATTCCATAGACATTG
	1177	9	434975	GACACTATAAATGACATGATGTGAG
	1178	9	435084	ATGTCATTCAAGCTTAAAGGAGATC
	1179	9	435985	TTTCTACTGAAGGGCATTATTTCCA
	1180	9	436945	TATACTCTGAACCATGTCGTGCTGT
	1181	9	438689	TTTTAATGCCTTCTCCTTATGTTTG
	1182	9	439767	GAGAGACAGGATGGTTAGGGTTAAA
	1183	10	19570	ACCATCTGTAAAAACTGAGCATAAT
	1184	10	21723	CGCTATTTCTCCGACGTAACCTCCT
	1185	10	21755	TGTGCCGTGCCTGAATAACTTAAAA
	1186	10	22009	ATGATGCGAACTATGATCCAGATCT
	1187	10	22194	ATCTATATCGGAGACAACTTTTACG
	1188	10	22914	TAACATGCGGAGAAACTTTAAACTG
	1189	10	23031	GATCCTATACGCACAGATTTCCTAG
	1190	10	23145	AGAATACTGAATTATCGCAAGGAAC
	1191	10	23668	TACTTTCTCGGAATGGAGTCTCACA
	1192	10	24106	TTCTGCTGTACGTTGCTTTTTATTT
	1193	10	24210	GCGTAAGTTAAGTATCCAATGCTCA
	1194	10	24296	CTATTTGTTTCGAAAGATCAGTACG
	1195	10	24405	CATAGTTGCCAAAAAACATGGTGTA
	1196	10	24974	GCCAACATCTTGGACGAAATCTCAC
	1197	10	24978	ACATCTTGGACGAAATCTCACGCCA
	1198	10	25216	TCCTTCTTTGGCACTGGTATAAACT
	1199	10	25224	TGGCACTGGTATAAACTCTGAAGTC
	1200	10	26187	GACGTTTATGAACTTACTCCTCAAA
	1201	10	27189	AATTATAGCCATTCCAAGAACACTT
	1202	10	28138	GTAAAAGTGAACCATCATCTAAAGG
	1203	10	30278	ATTGAGTTTGGACTTAAAGCCTCAA
	1204	10	31600	TCTCCATACTAAAAAATGATCCGAC
	1205	10	37919	GCGACGTCTGAAATCCAGTAATAAT
	1206	10	39642	AGAAGTAAAACATACTGGACAAAAT
	1207	10	44847	TTCCATAGAAGAGTCGATTAAAGAT
	1208	10	45614	GCTTCAAATACTGTTCATCTTTATA
	1209	10	50993	TTTCTTGTTGGTACACGTCAATAGT
	1210	10	53303	AGCGTAAAACTAACAGCAATAATTT
	1211	10	53925	CCATGGGATAAATTTACTCAAGTGG
	1212	10	54943	GACAGTATAGGCAGTTAGTATTCGA
	1213	10	55319	ACATGATTCAAGGACCCTAAGTAAA
	1214	10	64077	GTCAAGATGGAAGAAATGTCTTAGA
	1215	10	69361	CTAAGCGTATCAGAAGAAATCTATT
	1216	10	71080	TCAAAGAAATTGCAAAAAAGACACA
	1217	10	73698	TATAAAAGCGGTACTATTCCTTCTG
	1218	10	74842	TTATGAGGCTATCTTGTGTTTATTA
	1219	10	76727	ATTTATACAATGCGGCCCATAAGCA
	1220	10	78219	GATGACTTGATATTATGATTGGAGG
	1221	10	79082	AATTTGTTGTTCGAATATGGATAAA
	1222	10	101785	ATTCTTTGAATTTTTGTAGTCCTAT
	1223	10	104529	CGTTCTGATAAATAACCACCAAATT
	1224	10	106896	ACCTTGGTATGTAAGTGTCTATAAA
	1225	10	108233	CGATTTCTTTAAAGTCTGCGATTTG
	1226	10	118606	GACCGTCATTAATTTGTGAAATGAC
	1227	10	118882	AATTTCGAAACAAGAAGATAAGTAT
	1228	10	119107	AGAGGAACGTTAGAATTTCTGTATT
	1229	10	120082	AAGACAAAAAAGCTCATTAATGGCT
	1230	10	121973	AGCCAGTCCTAATGTGTATATTAAA
	1231	10	122599	TGACTATCGGTGGCTTGAGCAGTAG
	1232	10	139410	AAAAAATCAACCAACTATTCCAATG
	1233	10	140039	TATTAACCGAATGTCGAGATTATTA
	1234	10	141564	CAATTTTACGATATCAATTAACCAT
	1235	10	142167	CGTTGCCTGGGTAACTATTGAGTTC
	1236	10	155895	CAATTTTTTTTCAATTAGCAGGCAT
	1237	10	156944	CTTGTGCCAATTTAAATGGGTTATT
	1238	10	157312	TTACATTATACAGAGCCGAGATTCG
	1239	10	158279	ACCAACAATCAATCATTCACATTAA
	1240	10	161497	ATATTATTTTCCATTCATTTTGCAT
	1241	10	162427	AATTATAAGGAACGCTGGACTTTCA
	1242	10	162671	TTGTTTCATGACGAGAATACTAATG
	1243	10	163559	TGGCATATAATTCCCTCAAAAGAAC
	1244	10	164215	TTCTCTGAATCCTTTTTTGCAATTT
	1245	10	164855	ATACCGAATATTGGATGCTTCAATT
	1246	10	166129	TTCACGAATCGTAAACAAATCCAAG
	1247	10	169988	GTGACGGAATTCTTAACTTCATTTA
	1248	10	176128	CTCGAATCTTGATTTTGTTACCATT
	1249	10	177700	GCAATAATCGAATAACACAATATAT
	1250	10	181807	AAGACAAATTTTGATGAGTATACTT
	1251	10	184143	GCTAATTATTACGATTTTTGTTGAT
	1252	10	188446	TTTGCAAATGCCAGTTTCTCACCGT
	1253	10	191363	CATTTGATTAGAAAAGCAGAGAATA
	1254	10	201062	GAGCAGTTAAAAAAAACAAATCATG
	1255	10	201628	ACCAAAAATTCGAGCCATATATTAT
	1256	10	203696	ATATTATTGAAGATTGGGTGAATTT
	1257	10	207602	AAAGAAAACTTTCGTGAATAATGAT
	1258	10	209715	AATGTACGTAATATTCGATTAGAAC
	1259	10	211014	CTTTAAAAAGAGACCACACGCATTA
	1260	10	211250	ACTTGTCATTCGCCTTAAAATTCAT
	1261	10	213419	TACCAACGTTAGGTGGTATCTAATA
	1262	10	215129	TCTGTTTTCTAAGTAGTGGGAAATA
	1263	10	218051	TGTGCTTGATTTAATAACGAGATAC
	1264	10	219325	TTTACGTCACCTTCTAATTTGAGAG
	1265	10	220352	GCTACGTCATAAAAATGGGAGTACC
	1266	10	223560	GCTCAGATCCTAACTTGGTATGTTT
	1267	10	231435	CGTCGACACTGGCGATACGATAACT
	1268	10	232559	AGGATGGGTTGAAATCACTTGATAA
	1269	10	233718	AATGGTTTTTACAACTATCGAATAG
	1270	10	277666	TCCTTTGAACGAAAGACTTATGCTT
	1271	10	284585	TTGGGTTCCAATGCCTTTTTAATCA
	1272	10	292834	AATTAACTGAATTGGAAGTTACACT
	1273	10	298812	AAAAATCTTCATGTAAACCAATTCT
	1274	10	299051	ACAAATCGTTTCAAATATCTCTTAG
	1275	10	306051	GGAGGAGAATATTCGCGCATGAACT
	1276	10	311970	AATTGTAAGTAGTAGACAGGATCTT
	1277	10	313728	GCAAATAGATATTGACGTTCATGCT
	1278	10	316435	AGCCAAATCTCTTGACCGTTATAAG
	1279	10	319675	TTTGCGCTCTTGATTAACATAGAAT
	1280	10	321390	AGATTCTTATTTTGAACGATAATTT
	1281	10	323223	GGGAAGGTACGATAGAGATATATAT
	1282	10	323267	AATTGCGTATAGAATCCATTGTTAC
	1283	10	324690	TATATTTTTATGCAGAAGTGGTAAA
	1284	10	325700	CAGAGATATATACGTAACCTATGGA
	1285	10	325768	ATCTTATGAGAATGAGGAGTTTATA
	1286	10	330048	ACTTATGCTATCCCTCAAACTATAT
	1287	10	330939	CTCCATCTGCTTTAGAAACTTCGTG
	1288	10	335686	GAAGATTTCCCTTTACTCATGTTGA
	1289	10	339569	TCTCTATTCCGGCTCCACTTTTAGT
	1290	10	341323	AGTATTTACATGATCCCAGCATTCA
	1291	10	344968	GAGACTAGAAGAACTATATGGTAAA
	1292	10	353649	TCAATATAAGCGATACATTAGGAGT
	1293	10	353748	ACTGTTATTTGAGAAACCGACAGAT
	1294	10	353835	TCTTCCGCTCCAGAATAAAGTTCCT
	1295	10	374220	CACTTGATTATACGCCAATAAACTT
	1296	10	378087	TTGCTCAGGTATTTACAGGTTTAAC
	1297	10	380306	GTCCTGTAATCATCACCAAAAGTCT
	1298	10	399289	ATTTCTCTACAACTTTCGCATTAAA
	1299	10	410039	CTAGCAATGATATTCGAAGGTTGTT
	1300	10	412636	AGTGTTGAAGACTAACACTGGTAAA
	1301	10	424741	ACTGAGACCTTCCTTACTTTCTCCT
	1302	10	425789	CTTCCGTCCATGATATAAATAATGG
	1303	10	428359	AACAAACTAGAGTATATTCCACCCG
	1304	10	430783	TCAAAATTAATCAATGAAACGATGT
	1305	10	436373	AGTAGAGTTGTTGAGAACGAGTATA
	1306	10	445295	TAATTAACCTAAATTGAGCCTAACA
	1307	10	602370	GAGTAGAATCGCAGACAAAATTCAC
	1308	10	603976	GAATTTTTGCCTTTTAACTATATCA
	1309	10	604397	CAATTTGAGTGAGACAATGGAAATA
	1310	10	604940	AGGTATAATTAGTGGTATATGGGTA
	1311	10	604948	TTAGTGGTATATGGGTAGAAGTCTT
	1312	10	605802	TAGTTTAAATATCTGAAGAAGCAAA
	1313	10	606794	CTGCTATAACACCGTGGCAGTGTAA
	1314	10	607371	TTTGAAAATATCAATGCAGGACCCT
	1315	10	607657	TGAGAATATCTACTGAACCTCCGTG
	1316	10	608599	CCAGATATGACTGTTCCTTCTGTGG
	1317	10	608693	TGGTGCTTATACTGTTTCTACTGCA
	1318	10	608968	CCTCTTGTCACGTGATTTAGTAAGA
	1319	10	612162	ATTGTAAATGGATGCGATGACTTCG
	1320	10	615070	TGTAATACTCCCCAGTTAACCTCTA
	1321	10	619903	TTTAACGAACACTATTAATGCAAAA
	1322	10	619907	ACGAACACTATTAATGCAAAAAAAT
	1323	10	620015	GTTCGATGAACAGTCCTTAGCTAAC
	1324	10	644069	AAATTGTTACACTACCATTCAATTG
	1325	10	645466	CCTTGAATTTTGACGTTTACAATAT
	1326	10	648368	ATGTCTTGTTGTTTATCGACAATAT
	1327	10	650491	ACTGAGTCAATGTCAAGGCATTACT
	1328	10	658817	TTTGTAAATCGGACTTATATTCTAG
	1329	10	666332	GTTGCTCTCGTTATAGTGTTCAAAA
	1330	10	682296	TAACGTTGCCATAATCATTCACATT
	1331	10	683942	TCAAATTAACAGCTTTTGTGAGAAA
	1332	10	685376	TATTTCAAAAGATGGTTAATTCATT
	1333	10	686395	TCAATAAAAACAATAGAGGCCTCTT
	1334	10	691961	AAACAAAGCTTATTCATGGGATTAT
	1335	10	693642	TTTCTAAAGACGTCAAAGTTTCAGA
	1336	10	697785	TAACGAAGTTCAATAAGGAATCAGA
	1337	10	698817	CTGTAAGGTTCAGAGGCAAATGGAT
	1338	10	705481	ACGTGAGTGAGAGGAGATCCGAAAT
	1339	10	705760	ACGGACCACATGTTAACTGCGGAAT
	1340	10	712863	GTTATAGTAGTTTCCAAAGTTAGCA
	1341	10	712886	CAACTCGGTTTCAGTAGAAGTGATA
	1342	10	727973	TTCCCATTAGTGGGAGGAAGAAAGA
	1343	10	743107	GAGGAAAAACAATCCAGGACACAAT
	1344	11	3015	TACAAAACCCAAGGTCATTATGGTG
	1345	11	3371	CTAGAAAAGTATGTAGAAGTCCGAA
	1346	11	5645	TTGCTACAGATTCATTATTTCCAAA
	1347	11	7537	TTTATTTCACACTGTAGATAAGAAG
	1348	11	8189	CTAAAGTCTTGCTGTCTAAGGACCA
	1349	11	8376	TCGCGAAAATATTAATAGAACCATA
	1350	11	8700	TCCTTGCATCTGTGTATAATACTGA
	1351	11	12210	AAATTCAAAAGAGTTATCTTGGGCT
	1352	11	12550	AAATATGCAAGGATTCTAGATTTCA
	1353	11	13345	TTTGGGTACCAGTGAGAATTGGGTC
	1354	11	13724	ATATAATCGGCTTTGTATCTTTAAC
	1355	11	13728	AATCGGCTTTGTATCTTTAACATCA
	1356	11	14422	TTACAATTAACTAAGCCAATGTATG
	1357	11	16402	TTCCCGTCTACTGTTAATCAAGGGA
	1358	11	16848	ATTAGTAATAAGAGCAGACGATATT
	1359	11	19264	GATATGGTAAAAGATTAGATTAGGA
	1360	11	19514	CTAATACCTTTAAACATGCCAGCGT
	1361	11	20165	GGTTATTCAAATATTCAATTCTGTA
	1362	11	21320	TTGCACACTTTTAAACAATACGATT
	1363	11	24230	CGAAGGGATTAGAATGTAAGTACAT
	1364	11	25595	CGAGTTAAACTTGTCTTGTCCTAAT
	1365	11	26695	AACATTGTTAAGTGCCTGTTCTTAT
	1366	11	26794	TTCGATATTGACTAAGAACCAAAAA
	1367	11	29372	CTGAATTTCAAAGTAGTGGTTTCTA
	1368	11	30015	AAAACCCAATCTCCCTGGCAATATT
	1369	11	35594	TGTTAATTGATCACCTGGAGAAATT
	1370	11	36769	CCATGGACACCTTCTTTTTTGTATT
	1371	11	44241	TTGTTTTAGTGCATACCCAATATTT
	1372	11	56295	TAATGAACCCTTGTTATCTCTAAGT
	1373	11	61068	GACGTCTAGAATAGGATCAATATAA
	1374	11	61568	TTATAAGCCTAACAAACTCCGTCAA
	1375	11	64544	CTTCAACAGTATTAGCAGGAGTATA
	1376	11	64552	GTATTAGCAGGAGTATAATCTTCTG
	1377	11	67628	ATTATTTCTTTATTGCCTCAACCTA
	1378	11	67852	TATCATCGCCCAGAAATTTGCGGGG
	1379	11	74096	CGATTGATCAGCCATTTTTTTTTAT
	1380	11	74532	AGCGGTTTCTTACACTAATTATACA
	1381	11	91778	ATTTATCATGCCAAAAAAAATTCAC
	1382	11	92410	TTCTTCTTTTCATTCACGCAAGTTA
	1383	11	92422	TTCACGCAAGTTAAGTCCAGGAAGG
	1384	11	93440	AAGCCTAAGCATAAATCGTTTTATA
	1385	11	96539	ATGAAAAGCATTTATTGCACTGAAA
	1386	11	97884	ATTTGGAATTTCATTACGACGATTT
	1387	11	99632	GAGACAATGAATGAACAACATCTAT
	1388	11	103488	GTTTGATGTCACATGGAGAACCTTT
	1389	11	104312	TGTTGAAGGAGAACATAATCCAAAT
	1390	11	105963	ATTTAGATCTGAAAAAGGTTTATTG
	1391	11	111029	AACTATTGGTAAAATGGTTGATTGG
	1392	11	113132	ACAATTCACTAAAAAGCAGTATTTC
	1393	11	115981	CAGAGGTTTATTCATCAAGCCATCA
	1394	11	118301	ACTCACGTAATAAAAAATCCTAGAT
	1395	11	119338	ACTTATTAACCAGAAGGAAATCAGA
	1396	11	129616	AACCACAGCATCGGAGTCCCTTTCA
	1397	11	133585	TGACAATATTCAGCACAATCCTACT
	1398	11	135686	GTTGTTCATCGGATCAACATACATT
	1399	11	136261	TTCAGACCTTCCTAAATCACTCGTA
	1400	11	136265	GACCTTCCTAAATCACTCGTACCTG
	1401	11	141090	CGGATTACAAAGGATAGAAAATTGA
	1402	11	145614	TACATGTCGTACCTTTTTAATTGTA
	1403	11	147346	TGAAGGCTATTTGGTCTACTGAAAA
	1404	11	148271	TCCTCTATGTGAAATTTTTTCTGTA
	1405	11	149102	GAACAGGCATTTTACATATTCATTA
	1406	11	150907	CATTGTCGAAAATTACAAAGTTTGT
	1407	11	155283	TACACAAAAGCTTAACAAAGAAACA
	1408	11	156351	CCGCGGATTTGACTGCCAAGACTTT
	1409	11	158531	GGTATCTCTGTATAAGCGGAGTCTA
	1410	11	160789	ATAATTTGGGCCTAAAATATCATTC
	1411	11	162574	TGATGTTCCAGCAGTTATATGATCT
	1412	11	165239	GTCTTTTTCACTATCGGGTGAGAAT
	1413	11	166676	TAATAAAGTGTTCAAAGGTGATGAC
	1414	11	167774	GTTTATTGCTTAGGAGATTCTTATT
	1415	11	168974	AAATGCCTCGATAAAAAATTGAAAG
	1416	11	171261	ACTGGTTAGTTATAATGTGTCTACT
	1417	11	173872	ATTTTTGACCGAGTACATCATGTAC
	1418	11	174174	TTGAACCATCGTAATAAATCAAGGA
	1419	11	175382	TCCGTATTCACTCTAAATCAATGAG
	1420	11	183816	TCTCTTCAAACAATTGCTATTAGGA
	1421	11	184075	GTGGAATTATTCAATAAAACTGCAA
	1422	11	186663	CTAAAGTTGTTAAAGTATTCAGCAT
	1423	11	189092	GGCAAATAATGGCCTCGATTAAGCA
	1424	11	193802	AAATCTAGTCACAATAACATAATCT
	1425	11	196263	GTATATGTAATGCACTTTTGGTATG
	1426	11	199531	GCAAATAATTTGTGATATTACCTGC
	1427	11	202264	TCGATTTCTAACGGTCGTATCAATC
	1428	11	211819	TTATTGGAAGATGATGGCAATAAAA
	1429	11	213089	TCATTTAATGTTGATAATGGTGTAC
	1430	11	221667	AATCAAATCGCATAAAGGTTTTTTG
	1431	11	226592	TAAGGTTAGCAATGACAGTAAACTT
	1432	11	227044	ATAATAATACTAATAACGATCACAA
	1433	11	233460	CCAATGAACTTGATCAAAGCAGTTT
	1434	11	246340	ATAAATCTGATTCCTCGGTATTAAC
	1435	11	247373	ACTAAGATTACTGATCAGGCTCTAT
	1436	11	247513	GTTTGCTTGCATAGCCTATCTTACA
	1437	11	248355	AACTCAAATAGATCATCAAATAGGT
	1438	11	249487	TACTCACCGGTCATTTACCATTTAA
	1439	11	249938	ATATAAACAACGTCACTCAATATCA
	1440	11	251956	CAGATTATACTATACCAAACACATA
	1441	11	253384	TTCCTCAGAGCTGTCACTGAGATCT
	1442	11	254594	GCGAGTAAAGTACAGCCACTAGTTA
	1443	11	257599	ATTGTTGTTTTTATTCATTATGCCA
	1444	11	257627	CCCGAAAAATGAGCAAAATCGGTCA
	1445	11	259381	AAAATTTGAACTCGAAATGAATGTA
	1446	11	259385	TTTGAACTCGAAATGAATGTATTAG
	1447	11	260015	TTTTTATGCTTCAAGAGTAAGTAGT
	1448	11	261788	GCTAATACGCATAGAGTTGTTATTT
	1449	11	263599	CCTATGTCTGTTCCACTATATGGGT
	1450	11	267341	GCACTAAGCGCTTTACTCAAATATT
	1451	11	270947	TTCAACAAAATCTGGATGCATTGAA
	1452	11	272594	TTTCAACACTGAAACTTGCATTAAA
	1453	11	274949	CAGATCAGAATATGAACGGTAAGCA
	1454	11	287471	TTAAAAAGCCTTCACAATAAATCTC
	1455	11	288437	ATATATGTAAGAATTCCTCAAGAAG
	1456	11	289357	AAGAACTGGGAGATATCTTATGTTT
	1457	11	290790	TTCATGGATTCATTTCTCAATATCT
	1458	11	301148	TGAGAAAAAAGATATGAAATCACTT
	1459	11	306045	TCGATAATGGAGAGCATAAACTTAT
	1460	11	306424	TTACCCATATTCAATCAAAGTTCAA
	1461	11	308387	AGCATTTTCAATCACATATGTATAC
	1462	11	310916	ACTTTTTGGGCAGAATAATCAGAAA
	1463	11	311642	TCCTTCCCTACAACAAGCCCCAGTA
	1464	11	311650	TACAACAAGCCCCAGTAACTAATGA
	1465	11	312696	ACCATAGATCACCCAGTTTTAACTT
	1466	11	312990	TTGTCTCATGAAATAAAAACGGACA
	1467	11	315478	TCTGGCGGAATGTATATATTAGACT
	1468	11	315535	GGGACTTTGGACCTAACTCTGACAA
	1469	11	317349	ACTTCGACAGTAAATTGAGAGAATA
	1470	11	322773	TATAGAGAAAAGAATTAAAACGTGA
	1471	11	327609	ATCATTATTTACGTAATGACCCACA
	1472	11	327689	TATTATCTATATCGACGTATGCAAC
	1473	11	329320	TATTTACCGCTTATACACTACATGA
	1474	11	330244	CTCTCTTCTACCGCTTTTAATACAA
	1475	11	331929	AATTGATTTTCTAGGCAATTTTTGA
	1476	11	332115	TCAGAGTGCATATTATAAAACCAAT
	1477	11	350329	CATATCACCTTGCAAATAATTTCAA
	1478	11	351382	GCAGCTTCATACACAATACCATCAT
	1479	11	355836	ATTCTTGACAGGCCATTATGTAAGA
	1480	11	361852	TTATGCGCATTGAACATTGTAATAT
	1481	11	364229	ATAGACTTTTCATGTGTACTTGTTT
	1482	11	365086	CTCTTTCACCATAGACTTCGTTGGA
	1483	11	366441	TCATCTGAGTTGGATGGAAATAAAA
	1484	11	367174	TCAATGAATGTTTCCAAAAAATCGT
	1485	11	367394	TATAAATGATGTGAAGCCTCCAGTT
	1486	11	378709	TTAATAAGAAGGGCAATACGCATAT
	1487	11	382763	GATACGGTAACCATCAACAGGTGGG
	1488	11	383831	GATATGTCTCCTTATTAATGCAAAA
	1489	11	385072	GATGAATCGCTATAATTGTTGTAAT
	1490	11	386692	CGACGTAAAACAAGAATCGATTAAT
	1491	11	387176	TATCATTCAACCAAAGTACAAAAAT
	1492	11	388770	TGCGACGGAAATCAATATTGAAACT
	1493	11	389556	TATATTCCTTATACGGGTTCACAAT
	1494	11	390169	GCTTGTTGACCAGCCTAAATAATCT
	1495	11	391582	TAACTGTAGAAGCAGTAGCAGAGGT
	1496	11	392161	TCTTAGTCTATAAGCTATCACGGAT
	1497	11	394657	GTTGCAGATGAATTATTAGGCTTTA
	1498	11	395392	AAGATATTCGTATTAAATTCGTCGT
	1499	11	396348	ATCATTATCTTCATCACGAACCACA
	1500	11	397407	ACTTTTTCGAATAACTCCTCACAAG
	1501	11	398507	GTTTTGAAACTTCGATAACTGCATT
	1502	11	410473	TAAGAAGAGCACAATTATTAACATT
	1503	11	410630	CGAAAAGTGTAAACCTCACAAAGAT
	1504	11	412123	TAACTTATATTGGCAACGGTATGAC
	1505	11	413864	CACTAAACACGACTTTTTGAATTAT
	1506	11	414319	AATGAGTCAAGTTTCAAGTATATAT
	1507	11	415076	AGATTGGTAAATCAGGAATTCTAGT
	1508	11	415424	CATTCGTCGTTAAAAAGATGCTGTA
	1509	11	417035	AATAGTCTCGAAATAGTTCAATTGA
	1510	11	418583	TGTTGCAAAACAATTCTCATATAAA
	1511	11	424582	ATCGAAGAATTGGACGTAGATTGAT
	1512	11	425823	TTCCTTTTGCTATACGTACATCACT
	1513	11	429584	ATATTGAGACGAATTTCGAAAATGA
	1514	11	430182	TATAGCAAGCTAGGTCCCATTCTAA
	1515	11	431142	ATACACTATTTTTACATCTTGACAT
	1516	11	438186	AGCGCTCTGAGTATATTTAATGAAT
	1517	11	443441	GGTACCAGAGTAACAGATGAGATAT
	1518	11	458408	CATATATAATTGATGCATACCGTAC
	1519	11	459950	GAATTGCGTAAAAGATCTAAATCCT
	1520	11	462124	GGAATACAATTCGGCTTCAAATATG
	1521	11	468341	TAACTATTCGAGACCTTACCGAGTA
	1522	11	469463	TCGCAATACCCTTTGGACTATTGCT
	1523	11	473048	TAAAGAATGGCTATAATTCCTGTAT
	1524	11	473793	AACCATTGTAGAAGTACGCAATTTC
	1525	11	476993	GATGATAGGTTTTCATTTTCATGAA
	1526	11	488174	TTCAAAGATACTATCGTGAAAGAAG
	1527	11	489913	TATTTTTCTTTAGGTCTTGAGTATC
	1528	11	491888	ATTTCTATCATGGAGCGAAGTAATG
	1529	11	492956	CACCATCTGTTGAACTTTTATTTAA
	1530	11	494246	ATTCTTGAAGTATCCTGATGTTTTA
	1531	11	495522	GATTGCGTAGAGAAGGATATCACAG
	1532	11	495949	CTAAAAAGATAGTAGATGCGGATAA
	1533	11	496051	TATCGAAGTTCAAAGAGTATATTGA
	1534	11	497623	AAATATTAGAAGAATGTTGTGCAAA
	1535	11	500880	AAAAGAATGCATAATGAAAACTGTT
	1536	11	513088	TTTCGTCGAATTGGTACCTCTACAG
	1537	11	522304	GATATAAATAGTGATGGTGAACTCA
	1538	11	523807	CTATATAAGAGTGGCAGGAAAAAAA
	1539	11	527218	ATCACACGATGATTGATAATTTGAT
	1540	11	533472	ACGAACATCCTGAAGGTATATAAAA
	1541	11	537298	ACCATAATAATTCGAGATAACTGTT
	1542	11	540508	TAGTTCTTGGCTGTCATGTCCAAAA
	1543	11	542838	CTTCGAGGAATATTATAGACTCAAT
	1544	11	543652	TAACTCCACCAAGATTTTATTTACA
	1545	11	544760	TTTAGTTTGATGACTAGCGAATTAA
	1546	11	545500	TAAACTCCTTAATTCCGAGTAAGCA
	1547	11	546959	TCATGTGAAGTAGCCCCTTTTGATA
	1548	11	551520	AAGTTGAGCAATTTCTGACAAAATT
	1549	11	552248	TAAAGAGGTGCTATATATGTCGATA
	1550	11	553256	ACATCAATTAAATAACGAAGTTTCG
	1551	11	556111	AGCTGAAAAGAAAAAGTGTACATCA
	1552	11	560696	AATTGTCTATGTTTTCCTTCAGTTT
	1553	11	564314	TAACGGTGATAGTTATATAGATTAC
	1554	11	564338	CAACGATATGAGATTAAATGACATC
	1555	11	566011	CTTCATTCAGCAAGTTCAAGTAAAA
	1556	11	570572	CAATGAACACTTGAAGCTTTACTCT
	1557	11	572369	ACTGAAACCTTCATAGCCAAAAAAT
	1558	11	578505	CAAATTAAACTCTTGTCGTTGATAT
	1559	11	580437	AGTATCTGAATGCGATAAGAGAAAG
	1560	11	580474	ACTGAATGCAAAAAGTAAAACCTAT
	1561	11	581569	TTAGAGGGTATACAGTTGAGATTTT
	1562	11	585422	TTCATAAACAATCAAAAAAAGTGGA
	1563	11	585920	CGAGGCAAGACATTCTGAAGCTAAT
	1564	11	586708	AAACACCGATTGCTTCATTAATAGT
	1565	11	592702	ATTCAGTAACGATGACGAATTGAAT
	1566	11	593812	TAGAAATGACATTGATATAATTGGT
	1567	11	609866	AAACATCAATTGTGCAAAACAGCAA
	1568	11	610101	CAACATAACAGATCTGAGAGAAGAA
	1569	11	610628	GTATCGACAATGCTACATCAACCAA
	1570	11	611772	AGCAATAGGGTAGACAACGTTAACG
	1571	11	612762	CGAGCTTGAAGAATCGGACGAGCCT
	1572	11	612774	ATCGGACGAGCCTGAAGAGTCTGAG
	1573	11	614129	CACCTTTGTCCTGTTTTCGTTATCT
	1574	11	622041	CAAACTGACATTGAGAAATTACAAT
	1575	11	627008	ATAATAGTCAAGAAATCAACGACAA
	1576	11	628020	TCCAGATTTACAAAATGTCGTGTTG
	1577	11	628758	TTTATGCGATGACTACGATAAATTA
	1578	11	630662	ACAGCCTTTCCCAGATATACATATA
	1579	11	631654	CCAAGTGTATTAATTTATCTGCCGA
	1580	11	640437	TGGAAGAATAATTCTGAAGAGGATC
	1581	11	647427	TATGTCACTAGCTCTTCCTCGTCGT
	1582	11	649733	GTACTAAGACACCCATTTCGAGTAT
	1583	11	650256	ATTGACACAACATGCTGAAGAATAT
	1584	11	651373	ATAACAGAGTGTATTTTCAACCGTA
	1585	11	653069	TGTATATTTTATCTAGTATGCCAAT
	1586	11	655763	TCATAGGTCTTGTTTCTTCATTTTT
	1587	11	656735	ACGGTACGATTACTATTGATAACAA
	1588	11	657803	GGAGAGTACCGTGGTTCATATCGTG
	1589	11	657847	AATTTATAGAAGTTTATCGTAGTAT
	1590	11	658044	CTATTTGAGATTCTCTTTACAGGTT
	1591	11	661665	TACCATGGATTTCAGGCAATATTAT
	1592	11	664902	AGGGTTACTACTTCTCTGTGTGCAT
	1593	11	665018	CATTATTTCCTGTTTAGACACTTGC
	1594	12	14023	CTCAGTAAATTCATTGAAACAATTG
	1595	12	16129	ATTAAAATCTTGATAAATACACTGT
	1596	12	16137	CTTGATAAATACACTGTAAAAGCTT
	1597	12	17856	AGATGCCAGGAAATAAATGCGTATA
	1598	12	24299	CTTTTGGGAGGAGAAGAAGAATTCA
	1599	12	24451	TTTTTGGATTTGGAAATTCTAGAGA
	1600	12	25525	ATTAGTTGATCTGTAACTTCAGAGT
	1601	12	29073	TCTGTCCTTCTGAGATGTTATGTAT
	1602	12	29077	TCCTTCTGAGATGTTATGTATCATG
	1603	12	30746	CATTTCGTTATGGAAAATATTCACT
	1604	12	31765	TTAAACTTTCCGGCTGCAAGAAAGA
	1605	12	31970	CTTTCAAATTTAGCATAAAAAACAT
	1606	12	32387	TATATACATTGGTAGATTTTCAAAA
	1607	12	35179	CTTTTTCTGAGATGCAATGCTCATA
	1608	12	35195	ATGCTCATATCCAGTGCAGTACACT
	1609	12	35459	GAGCGTTATGCCAAAAAAGATAAAA
	1610	12	35464	TTATGCCAAAAAAGATAAAATTCTG
	1611	12	40540	TATTGTTCTTATTACCCGGATATTA
	1612	12	42230	ATCTCCACTTCAGAGTACAATCTTA
	1613	12	43296	CAGCTTCTGTCCTCAATGATTTTTG
	1614	12	44670	GCATTGCGACAATGATTAAGACACC
	1615	12	47196	TTCACACCCTCTTGAAATTCTATAA
	1616	12	47539	TTTGAACGTATGTATGAATGAAAAG
	1617	12	48816	AATGCGATAATTCTTTAGTTGTCGG
	1618	12	49052	TTTTTATGAGACAACAGTAATTCCC
	1619	12	51935	AGGTAACATGAGAAAACAGACAAGA
	1620	12	51939	AACATGAGAAAACAGACAAGAAAAA
	1621	12	52478	TCCATCCTTTTCATCATTCAAATGG
	1622	12	52587	ATCAAGTCTGATAATTCTGTTTTTT
	1623	12	54346	ATCTTTCCAATGTAATTCCCTGGAT
	1624	12	59251	TTATATTACGAACATCTTCTATCCG
	1625	12	59893	TTTCAATAAAGAACTCACCCAAATA
	1626	12	60643	TATCGTTATGAGGCACAATTCTCTG
	1627	12	60659	AATTCTCTGCACTCTCTTGTATTTT
	1628	12	61088	TTCATCATCAATCATAGAAGGTATA
	1629	12	63782	TAGGACACTATAAAGGTGGTTTATA
	1630	12	65600	CCACAAAGACTTTTCGGAATAGAAT
	1631	12	65604	AAAGACTTTTCGGAATAGAATATTG
	1632	12	66577	TCAACACATAACCTCAATTTTCGTT
	1633	12	68472	TAGTATAGGTTCCCCACTCCTGATC
	1634	12	70050	TCCTCAAGATATCAAGTCCGCATTG
	1635	12	71625	TCTTCGTACTTAATCGATAATAATG
	1636	12	74128	CGGAGCTTTTTAGTATGTATGGTAA
	1637	12	80703	GTCTAAATTTTTTTCAGTGAATCCA
	1638	12	80783	CTAAAAAAATGATTTTGCATGGAAA
	1639	12	80865	CATTAAGCTCTTGTTTATTCCTCAA
	1640	12	80886	TCAAACTGCTCCTAAAAACCATCCT
	1641	12	81082	ATATGGTAGAAAGCTTTCCCTATGT
	1642	12	82303	CTGAAAGGCCTTGTAACGATTTACT
	1643	12	84620	AGTCACCAGTTTTCAAAAATAATCT
	1644	12	91374	TTTCGAACAAGAATCAGTAATATAA
	1645	12	100136	TATCAATTTGAACTTTATGTCTGCT
	1646	12	100140	AATTTGAACTTTATGTCTGCTAGTT
	1647	12	103331	AAATTGAAAAAAATAATGACAGCAA
	1648	12	104664	CGGCATTAACAACCACATAAAGATA
	1649	12	111811	GTTTTCTGTAGCCTAATGGTACAAA
	1650	12	113963	GAAGCAATATTTTCATGATGTAGTA
	1651	12	113971	ATTTTCATGATGTAGTAGTGAAATT
	1652	12	113987	AGTGAAATTTATAATTGTCGCCCAG
	1653	12	126008	CGACAATCCATTACAGAATCTAATC
	1654	12	129645	AGACACTAGCCGTGAAGACTACAAC
	1655	12	130723	ATGACACGAAGAGAGCAGACTATAG
	1656	12	132967	TGTTTTCTGCTACAATGAACTCCAA
	1657	12	136523	TCTCAATGAGATGAAAGAACTTTGA
	1658	12	138141	ATTGGTCCTTCCTTTCCTCTGTTAG
	1659	12	158601	TTCTTTAACTTGCTGCTTCTTAAAC
	1660	12	164098	AAGGCAACCAGACCTATTTATAAAT
	1661	12	174995	CTTCGTATGTTTTATGTACTCTAAA
	1662	12	175185	GCCATAATTGGACGAAGACAAATAA
	1663	12	175193	TGGACGAAGACAAATAATTCACTTC
	1664	12	194390	AGGGTAAGATATTGTATTTCGGACG
	1665	12	234129	ATAATAATTGAGAAAGGAATATGAC
	1666	12	237907	TAATCTTTGCACCATATAAAGGAAA
	1667	12	241797	TTCCCTTTTTACATCCGTACATATA
	1668	12	242721	GTGTTCACGTTATCAATGTTGGTAA
	1669	12	243684	CTTTAGCGGGAAGGCTGACTATCTA
	1670	12	243688	AGCGGGAAGGCTGACTATCTATAGT
	1671	12	250573	TCGTGTAATCTGACAACAATCGACA
	1672	12	273530	GCAGACTGAATAGTAATACCCTTTT
	1673	12	286714	TAAAAAGAGAGAAGGCATATCCAAA
	1674	12	287000	CCCAATTCGAACATGGGTATGACCT
	1675	12	289378	TCAACTGTTAAACGCGACAGTAAAA
	1676	12	289422	GCTTCCAAGACGACAGTAATATGTC
	1677	12	289998	TTCTGGAGAGCTATTGTTCAAAAAA
	1678	12	291377	ACTTGGGACATCGTAAATGTTTACT
	1679	12	293819	TCCTTAAAGGAGCATTTATTCCCAA
	1680	12	295280	TCATTATCATTTCCTTCGTCTAGCA
	1681	12	296456	CTACTAACATTCCAGTGCAAGTAGT
	1682	12	297064	ATACTGCCATTATTAACATTGTTGA
	1683	12	299513	TAGTAGCGTTTAAAGAGGAAGTTGA
	1684	12	301274	ATCATATTGTAGTGTCTGAATGATA
	1685	12	302132	ATAGGTTTACATTATCTACACACTG
	1686	12	302140	ACATTATCTACACACTGGAATCGAT
	1687	12	302710	TAACGAACTAGTCTTAGAGAACTTC
	1688	12	303590	TCATCTTGTAGCTCGAAAGAAAAGA
	1689	12	306648	ACCAAAAACAGAAAGTACATGTATA
	1690	12	310971	AATTTCAATAGTTTCTTCTCGATTT
	1691	12	311881	TCTTGCCAGATTAAATTTAGATAAG
	1692	12	313833	ATTGACTTTGTATACGAATGGTCTA
	1693	12	315506	CACCTAGTAAGGAGACACGAAGTGT
	1694	12	317998	AATTGATTTTATACGCACAAACATT
	1695	12	323622	CTTGATGATTTAGAATTAGAGTATG
	1696	12	323626	ATGATTTAGAATTAGAGTATGACCA
	1697	12	325533	CCGTTTGATCATAAATACACAAGAG
	1698	12	326962	GCAAAATCTTGGGCATATCTACTAA
	1699	12	331068	TATGTTCGGCATACACCGGTATTAA
	1700	12	342692	AAATACGGTTCTGCTACCTCTAGGG
	1701	12	343198	TCTCATATTAGGTTTCGAATTTGTT
	1702	12	345223	TATTCCTCCAAAACACCTTCATATT
	1703	12	349581	ATTTAGATTCGCTCATAGACTTAGA
	1704	12	357419	TCAGTGATATATGATATTTGTCTAG
	1705	12	362500	AGATTCGCTCATAGACTTAGAATCA
	1706	12	369474	ACAACAGTAAAATAGGAACTCCGCG
	1707	12	369478	CAGTAAAATAGGAACTCCGCGAGGT
	1708	12	424486	CATTGTTTTGACACTGCGCAAATGG
	1709	12	430043	ATTATTGCTTTCGTATAGGAAGTAG
	1710	12	444763	AGAATTACCGATAGAAGAAATACTA
	1711	12	445073	ATGCATCAGATTCTGGTCATGCTTG
	1712	12	445168	TCTTGAAACGGCAATATCCTTTTAC
	1713	13	26807	CAATGTGGGACCCTACCCTAAATTG
	1714	13	26815	GACCCTACCCTAAATTGTGATTATG
	1715	13	28323	ACCTTTAATCTCGATCTTGCAGATA
	1716	13	28684	TGCCTTTCACCTGCAAAAAGTCATT
	1717	13	32442	GAGACCAATTAAGTGTGGATCAAAT
	1718	13	33492	TACATGTGAAAGGCGTATCTTTGTA
	1719	13	34788	ATTTTCGACGACATACTTCCAGAAA
	1720	13	37826	TTCTGCCACAGATTACGTAAGCGAT
	1721	13	37830	GCCACAGATTACGTAAGCGATTTAT
	1722	13	37882	AGTCACCAATGTGGAACGATAATTT
	1723	13	40359	ATGCAGGAAACTGTACCCCGTTTCT
	1724	13	45353	TCCAATACCAATGTTACAAAAGTGT
	1725	13	53797	CAATTACCACCGAAGATATAGATAC
	1726	13	53801	TACCACCGAAGATATAGATACAGCA
	1727	13	53973	TACGACGTCGAAGTGCACTCTAGTA
	1728	13	54571	CGTCGTCTTTTCATGCAAGGAAGGA
	1729	13	64448	ATGAATATTTTAGAATTTGTCCAAG
	1730	13	79932	TGTCCAAACAATAACTACCTGAATG
	1731	13	79936	CAAACAATAACTACCTGAATGATGA
	1732	13	80866	TACAAAACTTATATCCTAATGTTGA
	1733	13	81220	ATAAAGTGATAGCTCATAATGGCGT
	1734	13	113791	AGTGCGGAAATGTATACCAATAAAG
	1735	13	118664	GTAATGGGAACATTCTTGAAATAGA
	1736	13	119611	CCTTATTTCTAATGTTCCCTAATGT
	1737	13	121926	TTGTTTTTCTAAGTGCCTATGGTGT
	1738	13	121930	TTTTCTAAGTGCCTATGGTGTGCGA
	1739	13	121942	CTATGGTGTGCGATAAAATGTTTTT
	1740	13	122170	TTATTACCGTTCGAATATATGTAAG
	1741	13	122947	TACAGCAGAGCGACACTTTTTTGCT
	1742	13	123577	GTCTTCTAGATGCTTCAAGTAAACA
	1743	13	124031	TCCTGATCTTATTGTTTCTTGTATG
	1744	13	125284	TACTGATGGATCATAGTCTAGTGAA
	1745	13	127571	AATTCAGCAGTTTGATTATCCAAAA
	1746	13	132019	TAAATTCTATAGTTGTCAAGCGCTG
	1747	13	132694	TAATTATGGGAGATCGTTGATGATT
	1748	13	133094	TTTATTTGTTACTGTCAATTGTCTG
	1749	13	137462	CTCATTTAGTCACCAGTAAGTTATG
	1750	13	139000	TTTATACAGATGAAAATGAAACGTT
	1751	13	140743	ATGACTTCAAAAGCATAGGAAATAA
	1752	13	142173	AATACTCATTACAAAAACCACAATA
	1753	13	149080	CGATACCATTATTAGATTGTGTGGT
	1754	13	150885	TTCTGCAATTCAGTGAAGCTAGGTC
	1755	13	151138	TACTGGGTTTAAACATATCGTTCCA
	1756	13	155249	GGAACTTGTATTGGAGTTTGACAAT
	1757	13	155923	TAGTGTATTCTTTGGGTAGGATTCT
	1758	13	157269	GTATTTAGCAGTTGAAAATTTCCCA
	1759	13	159039	TAGATATGTTTTTATGTTTAGACCT
	1760	13	166246	TACACCCAGCTTTTCTACATTTTTA
	1761	13	168076	AATCATTCGTTCATTTCACTTTATA
	1762	13	168927	TGAACGTTTTATAGATAGATGTAAG
	1763	13	174961	TTTACAGAGTCATCTACGTACGGAA
	1764	13	174969	GTCATCTACGTACGGAATAAATACA
	1765	13	192035	GAATACATCCACTGTCCGGGTAAAT
	1766	13	192190	AAGCAACATATCGGTCCAACTTTTT
	1767	13	195272	ATACTTGGAATGCTCTTTTACAAAA
	1768	13	195413	TGGTAAATCCGAGAAATTTTCTGTG
	1769	13	196222	TCTGACAACTACAATATTAAGCCCT
	1770	13	196320	GTGTTACTAGTTGTTGGAATAGAAA
	1771	13	206116	TCGAGGTAAAAACTTCAACAGCCTC
	1772	13	206136	GCCTCACCAGAAACACATTGTACTA
	1773	13	206375	AGTGTATCGAACTGCCAAAAGTTCT
	1774	13	207743	GCTTTTGGTTCATACAAGCAGAATG
	1775	13	215528	AACAACATTTATGACCGCTATGCGT
	1776	13	217623	CAACGTGTTTATTAAAGGACATCAC
	1777	13	224207	TCAGTAGTGTGTACGGATTTTACAG
	1778	13	224219	ACGGATTTTACAGTTTCTTGAATGA
	1779	13	225242	TTGCATAAAATGGTTGTAATGTTAG
	1780	13	225431	CATTATTAATGGAACCTCTGTATTA
	1781	13	226114	TATCACCGGAGATTCAGTCTCTTGT
	1782	13	227950	CTCATGGCTTGATAGGAACAGAGGT
	1783	13	227958	TTGATAGGAACAGAGGTGTGCTTTC
	1784	13	229502	TGTTTCACGTCCTGACCCATATTCA
	1785	13	230925	AAAGCTTTTTACAAGTCACTAATGT
	1786	13	232166	CCATTGAAATAAGCAAGATCGCTCT
	1787	13	233129	AATATCGACTCTGATAAAAAATACA
	1788	13	234465	ATGCGTTTTTCAGTTTCATTATAAC
	1789	13	234633	TTATTAAATCACACAGGAATGAAAT
	1790	13	242842	TATTTAATTGGTTGTTGATTGATGT
	1791	13	251591	TTTGTATGCAGTGAATTATAGTTTT
	1792	13	253284	GAGCAGTTTACAGTGAATAATACAT
	1793	13	254875	AACAAATACTTGGGAATCACATTCT
	1794	13	257745	TTATCTTGAGGCGTATCATTATTAT
	1795	13	263052	CTATAACTGAAGCTGAGTGGTACTA
	1796	13	266153	CTTGAATATTTTGAGGAAAGTCTTA
	1797	13	266915	AATAGCTGACGATTCTTCAGTGATT
	1798	13	268033	ACATGACTACCTAACAAAATATTTA
	1799	13	268607	ATAGCTTTCAAAATTAATGTTGTCA
	1800	13	268639	AATGGGCACCTGTAAGAATAATTAA
	1801	13	274082	CACGTCGTTTCTACCACCAATAGTG
	1802	13	275770	TCTTTCGATAATTTGGATTAGATAG
	1803	13	275786	ATTAGATAGCCTTATAATATGCCGG
	1804	13	275839	TCTCCAGTATTCAATATTCGTCATA
	1805	13	276619	TTCCAATTATATGAGGAAAGTCGGA
	1806	13	276723	TGAGAGATATCCTAACAAATGCCAT
	1807	13	277277	AAAAACAAGATTGACTAACATAAAG
	1808	13	285816	CTAATATTTTAAATTGGGACTCACT
	1809	13	285824	TTAAATTGGGACTCACTAGCTCAAG
	1810	13	289707	TTATACTTAAACTAGCACTGATTTT
	1811	13	291379	TATCTGATGAAATGTCTATAAAGGA
	1812	13	296828	ATCTTTCATAGAATACGTCCTTCGA
	1813	13	296836	TAGAATACGTCCTTCGATACCATTT
	1814	13	297113	CATCACAAAGATCAATACAAAAGAA
	1815	13	299927	ATTGCATAATTTACCTGAACTAATG
	1816	13	301978	AGACCGTTTAATGATTTTCTGTAAT
	1817	13	330947	GAAACTCCAAGGATACTTAATATGA
	1818	13	331156	TTTCATAGAGAATAATATGCAGCTA
	1819	13	344461	AAATTTCTTATCGCATATGTGACAA
	1820	13	356987	GTTGTGCATTATCATTTGAGAAATG
	1821	13	367935	ATGTCATTGAAGGTAATAATCCAAA
	1822	13	371511	TGCGCATACAGTGTAAAAATGCGTT
	1823	13	371519	CAGTGTAAAAATGCGTTCAGGGAAT
	1824	13	371737	TATGTATTATTCGGTGACTTCACTA
	1825	13	371741	TATTATTCGGTGACTTCACTAAAAA
	1826	13	371850	CAGTATACAGCTGATGACAATTACA
	1827	13	371927	GAACGAAGAACCTTTGCTTATAACA
	1828	13	378613	TTCCAACAGAAGGTGATCTAAAGAT
	1829	13	378947	AAATTTTACGACTGTTTCTCAATGT
	1830	13	379960	ATATTGCCACATTTTCATCAGAGAA
	1831	13	389014	GCAGATTTACTTGACCAACGGAATG
	1832	13	390339	ATGCTCATTCTCAACAACTCAGTGA
	1833	13	396090	TACAATAGCGTTGATGTTTTTACCA
	1834	13	396159	TTTGAATTTATTGGTCGTGAAAACA
	1835	13	405287	TATTTTGATCGTATTGAATGGAATA
	1836	13	416110	TATGTATCGCATCTTAAAGTGAGAG
	1837	13	417041	GTTGTGGTTTTCAGTTCGACATCTG
	1838	13	417049	TTTCAGTTCGACATCTGGTTCATAA
	1839	13	417491	TATTTCGTGTCACTTAATAGAGAAT
	1840	13	419701	AAATTGTGAGAGCACCAGCTTGAAA
	1841	13	420330	AAACTGAGGATAAAACAAACAGTCG
	1842	13	420338	GATAAAACAAACAGTCGCAGTTGAG
	1843	13	436070	CTTCCGTCGACACATAGAACGTTTG
	1844	13	436329	CTTTTAACAATAGGAGACATTCGAA
	1845	13	436578	AAAAGATGATCCAATAAACTAGATT
	1846	13	438007	TGATACAATTAATGCTTTGAACTAC
	1847	13	439527	CACAAAACTAGGTCTCACAATAGAA
	1848	13	458983	TTTCTTTGCTGAAAGATGTTTTAGA
	1849	13	465021	TGCGTCTAGCGAACGAGGACATCTA
	1850	13	466288	AGGTAAAGAAATGAGAGACTCTAAT
	1851	13	469492	TCCTATGTTTGAAAGGCAGCCTGTT
	1852	13	472746	TACTTTTTCGGCATACATATCTATT
	1853	13	473544	TTCCTTAGTGAACTCTTGATCAAAA
	1854	13	475838	CCGTTAATATTCATTGAAAAAGGTG
	1855	13	476972	ATCGATGAATTTCTTGATTAAGTCG
	1856	13	477833	AACTGCACATAACAAAAGTATAACG
	1857	13	480484	TTTGGTTGACGGTACATTCATCTAT
	1858	13	481042	GATGGTAGTTTAGTATGGAACCATA
	1859	13	481509	CTACTAAATAGATGATAAATGGAGT
	1860	13	481541	CAATGGTGATAATGATTGTGATTTT
	1861	13	527992	CTGAAAGTAACATAAGCGATGAAAA
	1862	13	528894	AATTTAAAGATCCATCAGTCACACT
	1863	13	531087	GACTCAGAGAACTTTTCATTTGAAA
	1864	13	540805	TGCAAAAGCTAAAACTCAACGGTTA
	1865	13	542853	TCTGAGTATAATACGATATTGCAAT
	1866	13	551078	CACGGTTCCTACTGTTAATTTACAG
	1867	13	558870	ATTCAGAGGATAAGACAACACAACA
	1868	13	572576	TCTGGCGTAACTATTAGAAACATCA
	1869	13	616415	TATAGGAACCCTAAGACTTTTGGCA
	1870	13	628068	ATGCCACATATTTACTTTTAGCTGG
	1871	13	641077	TGGCTTCGTTTAAATTGGCGCCAAA
	1872	13	645777	TATAATCGCAATATTTTTGTCACTT
	1873	13	645895	ACCATTTCAGACCTGTTCCCAATGT
	1874	13	651366	CTTCACTCCTATCTAAAAAACTATT
	1875	13	653908	TTGCATGTAATATTTGTTTTCCGTA
	1876	13	664797	TTTGTTTGCTCAAAAGGTCTATTGT
	1877	13	688221	TATAATGACAAATTACTTGGGAGAA
	1878	13	693734	GAGTTACTGACTTGAAAGCCGGGGA
	1879	13	695272	AATAAGATGTAGTACTGACAAAACA
	1880	13	703848	TAGGAAAGGGAATTGCCTATGGTAG
	1881	13	703864	CTATGGTAGCTATAGTATCGTGTAG
	1882	13	703952	TTGTACCGGAACAGTCAACTGTTTC
	1883	13	704170	CATAATCGTATTTCAACTTTTTCAA
	1884	13	705083	CAAAAGAAAATCACTGGCTCCAAAA
	1885	13	705295	TCATTTGTAAATCCATGAACTTTTT
	1886	13	705919	ATCTCACAGACTTTCTATACTCTAT
	1887	13	705927	GACTTTCTATACTCTATTGATATGG
	1888	13	706050	TTATGCAATTGAAACTTATCGAGTG
	1889	13	706058	TTGAAACTTATCGAGTGTACCTTCT
	1890	13	706082	TATTATTATGGAGCCCAGTGATTCA
	1891	13	706466	CTCCATTAGGGATACCGATTTGAAT
	1892	13	707052	TATTGACAAGTATATTGAACACGTT
	1893	13	710332	TTTGAAAGAAGAGCAACTACCATTG
	1894	13	712374	GTTTTAGATACAAAATATGAAGCAT
	1895	13	723703	AATTTCATCCTCTATGCCTTCAAAA
	1896	13	736185	CAAAACCGAAGATACAGAAATCAAA
	1897	13	747031	TGTGGTTCTTAACGATACTGCAAAT
	1898	13	758272	CCGAGACCAAGTACAAGACAGTCAC
	1899	13	758510	AAAACTCACTGATTTCGTTCCCTCT
	1900	13	758833	TATATTACTACTATTCCTTTCTGTA
	1901	13	759340	CAAAAAACAATCATACTTAGTAACA
	1902	13	761986	CAATACATAGTTTCTTCTCCTACAG
	1903	13	762456	TGAATAAAAGCCATGCGTAATAAAT
	1904	13	762764	TTTATCATCCTCCCTCAAACTGAAC
	1905	13	764386	GAATCCTCAGTTCATACTCAATTAT
	1906	13	765037	CTAACGACTTGAATTCTTGATCGAC
	1907	13	766205	AATATCATTGTCCAACTCATTCATT
	1908	13	767061	CCATCTTCATAGTCATCCAAGGTAG
	1909	13	767069	ATAGTCATCCAAGGTAGCTAAAAGG
	1910	13	768294	TGACGATATTCTGTTCTTGATTAAC
	1911	13	768531	TACTCATGATTGTCGTGTTGGAATA
	1912	13	768535	CATGATTGTCGTGTTGGAATAAAAA
	1913	13	768954	AAGGTAAAGATTTAAAAGCTGCCAT
	1914	13	769726	TAAACTATGATACCGCTATTATTGA
	1915	13	769945	CATTTTGGACGATTCTTTTCAAACA
	1916	13	770265	CCTTCCCGGGTTCCTAGGCGCTGAT
	1917	13	770497	AATTTAGGCATTCTTGTGATTATTA
	1918	13	771035	ATTAACACTTGATGGTAATCCGCAT
	1919	13	772555	GAGTTGAAAAGGTCATCCAATATAC
	1920	13	774672	GGACGTCTTAACTTTTATTGCAGAG
	1921	13	774680	TAACTTTTATTGCAGAGGACTATCA
	1922	13	777820	ATTTACTATGGCAGTGTATTTTGTA
	1923	13	777948	GAAGCTATTTTTGATAGGAGAATAC
	1924	13	780998	TCTGTCTCCTTTGATGCAATACAGA
	1925	13	781439	AAATAAAGTTTCACAGACATCAAAA
	1926	13	782544	TTACTCAACTGGCTGTATATATACG
	1927	13	783820	AATACTTTGCTGAACATAACTCAAA
	1928	13	784124	ATTCTTAGTTATGTGAATATTGCTA
	1929	13	784554	ATCCACAAGTAGGTTAGAGATGAAT
	1930	13	785201	TAATAGTATTCTGGAGTTCTTACAA
	1931	13	788562	TTTGCATTCGCTTCAGTTAAGAGTT
	1932	13	790543	CCCGTTTGTTGAACGAAGACAATAT
	1933	13	790704	TTTGTAGTATGAACCAGGTAACCTC
	1934	13	791962	AAGAAAAATCCAATCTTAGCTTTAG
	1935	13	792061	TAAACGGAAACTATCCTATCAGAAA
	1936	13	794803	TGAAATTTTCAGATTTTAACTTAGA
	1937	13	796868	ATAAAAAATTTGTGAAATATGCTGT
	1938	13	798875	TATTTTGTTGTCCATTAACGCCAGT
	1939	13	800345	CGCGTTTTTCCTATTGTATATTGCA
	1940	13	800543	TTGTGTTACCGTCCTTATTCATTTA
	1941	13	800795	GCAACAAGTTGAAAATAGCATATTT
	1942	13	801802	CAAGGCTAGGTCAATAGAACGGTTA
	1943	13	802817	AACTTGGGTTTATATTCACTGCTAA
	1944	13	802868	TTCTCCGGTTCGGTTAGTCTACTCA
	1945	13	803664	TAACCTTCTATTTTGAGTCCATTCA
	1946	13	803892	ATAATTTCATTCTGACCTACAACTT
	1947	13	804754	GGGCTGAAAGGAACCATTACTAATC
	1948	13	805262	GTTGATCTTAAAAGGAGATGAATAT
	1949	13	805506	TCAATAACTTTTCCACAGGTATGAA
	1950	13	808169	TTTATTTTTTTCTCGCATTGGTTCA
	1951	13	808925	CGCAACGCAGATACAGATTTTACTT
	1952	13	809171	GCTTATGTGTTCATTTATTCTCGAG
	1953	13	812562	CTTGTTCTACTGTGTCATTTCGAAC
	1954	13	816114	GTTAAACAGCTGTGAAGTAATAAAA
	1955	13	816332	AATTATCAGATTTAGCAGTTATACA
	1956	13	818156	TATGCAGGGTATTGTACATCTCAAA
	1957	13	824784	CATGTAAGTCACACTAATCACAACA
	1958	13	826803	GTAGTTCCATTAATAAATCTGAGGA
	1959	13	827828	CTCTTGTTGTTGAAAGAGAGATTAT
	1960	13	827949	TAGAGTCCATATTATCCTTCATTAG
	1961	13	828090	TTAAGTTCTCTATATTGGCATCCGT
	1962	13	828138	ACACATCCACGTTGCCATTATTAGT
	1963	13	833516	TCTATCAAAACCATAACTATCAATG
	1964	13	834651	TATAGTTTGCTCAAAAGAAAAGACA
	1965	13	834758	TTCATCCATTCCACTCGAGCTGATA
	1966	13	834762	TCCATTCCACTCGAGCTGATAATTC
	1967	13	850644	CTGGCAAATCAATATAGTTCAATAA
	1968	13	853786	TTGAGGTCTCCTTCCAAATCAAGAA
	1969	13	854280	CATTAACGATTATGATACTACTAAC
	1970	13	856019	GATAAATATAATCTGTGGAACCCAA
	1971	13	863526	ATGTGTAGGCATACCGTTTTTATTA
	1972	13	877566	CTTTTCCAGTTTACGCAACAATCAA
	1973	13	880222	AAAACGCATAATGGAATGAAGACTT
	1974	13	880415	CTTCAAAGATACACTGTAAGACAAA
	1975	13	893635	GAAGCATTGTTACTAGAATTGAGAG
	1976	13	894264	GATGTTTAACAGGGATTTCATGAAT
	1977	13	898679	TTAAACAAGCTAAAGATCCCATCTA
	1978	13	903990	TGAACTAAAAATAGCCAAAATTCTC
	1979	13	904332	CTTTCTTTATTCACGGCCTTAAGAG
	1980	13	908605	AGTGAGTTCGGAAATTTCGTCAACA
	1981	13	908632	ATCTAGCGTAATGAGTTCAGAAGTT
	1982	13	908892	CCGCATCTAGTACACTTGGATCTAA
	1983	13	910548	CCCTTGAAACGATAATTGTCTCGAG
	1984	13	912197	GTCTGTCGCAAATCTATTAAATTAG
	1985	13	912444	GTCACAGTATATCACCCATTTACTG
	1986	13	914272	ATCCAGGGTCTTATCTGTGAAACCT
	1987	13	916623	TCAAGTTTACAAATACCTACCAACA
	1988	13	917279	GGCAAAGGTTTAGATCCGGTGGAGA
	1989	13	917477	AATACTTCTTGTGCTGTTTATAAAA
	1990	13	917844	ATTCCTAAGAACGAGAGGTTAGGAT
	1991	13	919697	TTGTTCAGACATCAAAATCGGCTCT
	1992	13	922431	ATAGTGATCATGAAATTGTGTGAAA
	1993	13	922475	GAGGTACTAAATGAGGATATGTTAA
	1994	13	924242	AGACATGCTAAATCAGGGTAAGAAT
	1995	14	17680	ATAAATTATATTGGCACCGCTTTAT
	1996	14	19504	TTACAAATTTACCTATACGCTCTGA
	1997	14	19945	CAATTTATCGAATCGTCCTGGTCTT
[truncated: 968 more rows]

## Sheet: Genotypes
	Table S10. Segregant Genotypes and Genotyping Probes
	Segregant Genotypes: For EM93 tetrads 1 – 120 (segregants 1 – 480), genotype calls: 1 = S288c-like genotype and 10 = non-S288c-like genotype; marker location = chromosome #:Nucleotide number (S288c numbering) of the first genotyping probe nucleotide.
Marker Nr							1	2	3	4	5	6	7	8	9	10	11	12	13	14	15	16	17	18	19	20	21	22	23	24	25	26	27	28	29	30	31	32	33	34	35	36	37	38	39	40	41	42	43
Marker Location							1:407	1:3875	1:3879	1:6350	1:7917	1:10572	1:12540	1:12596	1:12735	1:14306	1:16970	1:18489	1:20399	1:21676	1:23671	1:24951	1:28109	1:29411	1:29939	1:31156	1:34966	1:37294	1:42627	1:45095	1:49658	1:52838	1:59341	1:80290	1:81436	1:95738	1:98402	1:119337	1:121480	1:135321	1:143816	1:160164	1:170709	1:172102	1:174097	1:175980	1:179902	1:180009	1:180178
Tetrads	1	1	1	A	1:A		1	1	1	1	1	1	1	1	1	1	1	1	1	1	1	1	1	1	1	1	1	1	1	1	1	1	1	10	10	10	10	10	10	1	1	1	1	1	1	1	1	1	1
		2	1	B	1:B		1	1	1	1	1	1	1	1	1	1	1	1	1	1	1	1	1	1	1	1	1	1	1	1	1	1	1	10	10	10	10	10	10	10	10	10	10	10	10	10	10	10	10
		3	1	C	1:C		10	10	10	10	10	10	10	10	10	10	10	10	10	10	10	10	10	10	10	10	10	10	10	10	10	10	10	1	1	1	1	1	1	1	1	1	1	1	1	1	1	1	1
		4	1	D	1:D		10	10	10	10	10	10	10	10	10	10	10	10	10	10	10	10	10	10	10	10	10	10	10	10	10	10	10	1	1	1	1	1	1	10	10	10	10	10	10	10	10	1	10
	2	5	2	A	2:A		1	1	1	1	1	1	1	1	1	1	1	1	1	1	1	1	1	1	1	1	1	1	1	1	1	1	1	1	1	1	1	1	1	1	1	1	1	1	1	1	1	1	1
		6	2	B	2:B		1	1	1	1	1	1	1	1	1	1	1	1	1	1	1	1	1	1	1	1	1	1	1	1	1	1	1	1	1	1	1	1	1	1	1	1	1	1	1	1	1	1	1
		7	2	C	2:C		10	10	10	10	10	10	10	10	10	10	10	10	10	10	10	10	10	10	10	10	10	10	10	10	10	10	10	10	10	10	10	10	10	10	10	10	10	10	10	10	10	10	10
		8	2	D	2:D		10	10	10	10	10	10	10	10	10	10	10	10	10	10	10	10	10	10	10	10	10	10	10	10	10	10	10	1	10	10	10	10	10	10	10	10	10	10	10	10	10	10	10
	3	9	3	A	3:A		1	1	1	1	1	1	1	1	1	1	1	1	1	1	1	1	1	1	1	1	10	10	10	10	10	10	10	10	1	1	1	1	1	1	1	1	1	1	1	1	1	1	1
		10	3	B	3:B		10	10	10	10	10	10	10	10	10	10	10	10	10	10	10	10	10	10	10	10	10	10	10	10	10	10	10	10	10	10	10	10	10	10	10	10	10	10	10	10	10	10	10
		11	3	C	3:C		1	1	1	1	1	1	1	1	1	1	1	1	1	1	1	1	1	1	1	1	1	1	1	1	1	1	1	1	1	1	1	1	1	10	10	10	10	10	10	10	10	10	10
		12	3	D	3:D		10	10	10	10	10	10	10	10	10	10	10	10	10	10	10	10	10	10	10	10	1	1	1	1	1	1	1	10	10	10	10	10	10	1	1	1	1	1	1	1	1	1	1
	4	13	4	A	4:A		1	1	1	1	1	1	1	1	1	1	1	1	1	1	1	1	1	1	1	1	1	1	1	1	1	1	1	1	1	1	1	10	10	10	10	10	10	10	10	10	10	10	10
		14	4	B	4:B		10	10	10	10	10	10	10	10	10	10	10	10	10	10	10	10	10	10	10	10	10	10	10	10	10	10	10	10	10	10	10	10	10	10	10	10	10	10	10	10	10	10	10
		15	4	C	4:C		10	10	10	10	10	10	10	10	10	10	10	10	10	10	10	10	10	10	10	10	10	10	10	10	10	10	10	10	10	10	10	1	1	1	1	1	1	1	1	1	1	1	1
		16	4	D	4:D		1	1	1	1	1	1	1	1	1	1	1	1	1	1	1	1	1	1	1	1	1	1	1	1	1	1	1	1	1	1	1	1	1	1	1	1	1	1	1	1	1	1	1
	5	17	5	A	5:A		1	1	1	1	1	1	1	1	1	1	1	1	1	1	1	1	1	1	1	1	10	10	10	10	10	10	10	1	1	1	1	1	1	10	10	10	10	10	10	10	10	10	10
		18	5	B	5:B		10	10	10	10	10	10	10	10	10	10	10	10	10	10	10	10	10	10	10	1	1	1	1	1	1	1	1	1	1	1	1	1	1	1	1	1	1	1	1	1	1	1	1
		19	5	C	5:C		10	10	10	10	10	10	10	10	10	10	10	10	10	10	10	10	10	10	10	10	10	10	10	10	10	10	10	10	10	10	10	10	1	10	10	10	10	10	10	10	10	10	10
		20	5	D	5:D		1	1	1	1	1	1	1	1	1	1	1	1	1	1	1	1	1	1	1	1	1	1	1	1	1	1	1	10	10	10	10	10	10	1	1	1	1	1	1	1	1	1	1
	6	21	6	A	6:A		10	10	10	10	10	10	10	10	10	10	10	10	10	10	10	10	10	10	10	10	1	1	1	1	1	1	10	10	10	10	10	1	1	1	1	1	1	1	1	1	1	1	1
		22	6	B	6:B		10	10	10	10	10	10	10	10	10	10	10	10	10	10	10	10	10	10	10	10	10	10	10	10	10	10	10	1	1	1	1	1	1	1	1	1	1	1	1	1	1	1	1
		23	6	C	6:C		1	1	1	1	1	1	1	1	1	1	1	1	1	1	1	1	1	1	1	1	1	1	1	1	1	1	1	1	1	1	1	10	10	10	10	10	10	10	10	10	10	10	10
		24	6	D	6:D		1	1	1	1	1	1	1	1	1	1	1	1	1	1	1	1	1	1	1	1	10	10	10	10	10	10	10	10	10	10	10	10	10	10	10	10	10	10	10	10	10	10	10
	7	25	7	A	7:A		1	1	1	1	1	1	1	1	1	1	1	1	1	1	1	1	1	1	1	1	1	1	1	1	1	1	1	1	1	1	1	1	1	1	1	1	1	1	1	1	1	1	1
		26	7	B	7:B		1	1	1	1	1	1	1	1	1	1	1	1	1	1	1	1	1	1	1	1	1	1	1	1	1	1	1	10	10	10	10	10	10	10	10	10	10	10	10	10	10	10	10
		27	7	C	7:C		10	10	10	10	10	10	10	10	10	10	10	10	10	10	10	10	10	10	10	10	10	10	10	10	10	10	10	10	10	10	10	10	10	1	1	1	1	1	1	1	1	1	1
		28	7	D	7:D		10	10	10	10	10	10	10	10	10	10	10	10	10	10	10	10	10	10	10	10	10	10	10	10	10	10	10	1	1	1	1	1	1	10	10	10	10	10	10	10	10	10	10
	8	29	9	A	9:A		1	1	1	1	1	1	1	1	1	1	1	1	1	1	1	1	1	1	1	1	1	1	1	1	1	1	1	1	1	1	1	10	10	10	10	10	10	10	10	10	10	10	10
		30	9	B	9:B		10	10	10	10	10	10	10	10	10	10	10	10	10	10	10	10	10	10	10	10	10	10	10	10	10	10	10	10	10	10	10	1	1	1	1	1	1	1	1	1	1	1	1
		31	9	C	9:C		10	10	10	10	10	10	10	10	10	10	10	10	10	10	10	10	10	10	10	10	10	10	10	10	10	10	10	10	10	10	10	10	10	10	1	1	1	1	1	1	1	1	1
		32	9	D	9:D		1	1	1	1	1	1	1	1	1	1	1	1	1	1	1	1	1	1	1	1	1	1	1	1	1	1	1	1	1	1	1	1	1	1	1	10	10	10	10	10	10	10	10
	9	33	10	A	10:A		10	10	10	10	10	10	10	10	10	10	10	10	10	10	10	10	10	10	10	10	10	10	10	10	10	10	10	1	1	10	10	10	10	10	10	10	10	10	10	10	10	10	10
		34	10	B	10:B		1	1	1	1	1	1	1	1	1	1	1	1	1	1	1	1	1	1	1	1	1	1	1	1	1	1	1	10	10	10	10	10	10	10	10	10	10	10	10	10	10	10	10
		35	10	C	10:C		10	10	10	10	10	10	10	10	10	10	10	10	10	10	10	10	10	10	10	10	10	10	10	10	10	10	10	1	1	1	1	1	1	1	1	1	1	1	1	1	1	1	1
		36	10	D	10:D		1	1	1	1	1	1	1	1	1	1	1	1	1	1	1	1	1	1	1	1	1	1	1	1	1	1	1	10	10	1	1	1	1	1	1	1	1	1	1	1	1	1	1
	10	37	11	A	11:A		1	1	1	1	1	1	1	1	1	1	1	1	1	1	1	1	1	1	1	1	1	1	1	1	1	1	1	1	1	1	1	10	10	10	10	10	10	10	10	10	10	10	10
		38	11	B	11:B		1	1	1	1	1	1	1	1	1	1	1	1	1	1	1	1	1	1	1	1	1	1	1	1	1	1	1	10	10	10	10	10	10	1	1	1	1	1	1	1	1	1	1
		39	11	C	11:C		10	10	10	10	10	10	10	10	10	10	10	10	10	10	10	10	10	10	10	10	10	10	10	10	10	10	10	1	1	1	1	1	1	10	10	10	10	10	10	10	10	10	10
		40	11	D	11:D		10	10	10	10	10	10	10	10	10	10	10	10	10	10	10	10	10	10	10	10	10	10	10	10	10	10	10	10	10	10	10	1	1	1	1	1	1	1	1	1	1	1	1
	11	41	12	A	12:A		1	1	1	1	1	1	1	1	1	1	1	1	1	1	1	1	1	1	1	1	1	1	1	1	1	1	1	10	10	10	10	10	10	10	10	10	10	10	10	10	10	10	10
		42	12	B	12:B		10	10	10	10	10	10	10	10	10	10	10	10	10	10	10	10	10	10	10	10	10	10	10	10	10	10	10	10	10	10	10	10	10	10	10	10	1	1	1	1	1	1	1
		43	12	C	12:C		1	1	1	1	1	1	1	1	1	1	1	1	1	1	1	1	1	1	1	1	1	1	1	1	1	1	1	1	1	1	1	1	1	1	1	1	1	1	1	1	1	1	1
		44	12	D	12:D		10	10	10	10	10	10	10	10	10	10	10	10	10	10	10	10	10	10	10	10	10	10	10	10	10	10	10	10	1	1	1	1	1	1	1	1	10	10	10	10	10	10	10
	12	45	13	A	13:A		10	10	10	10	10	10	10	10	10	10	10	10	10	10	10	10	10	10	10	10	10	10	10	10	10	10	10	10	10	1	1	1	1	1	1	1	1	1	1	1	1	1	1
		46	13	B	13:B		1	1	1	1	1	1	1	1	1	1	1	1	1	1	1	1	1	1	1	1	1	1	1	1	1	1	1	1	1	1	1	1	1	10	10	10	10	10	10	10	10	10	10
		47	13	C	13:C		1	1	1	1	1	1	1	1	1	1	1	1	1	1	1	1	1	1	1	1	1	1	1	1	1	1	1	10	10	10	10	10	10	10	10	10	10	10	10	10	10	10	10
		48	13	D	13:D		10	10	10	10	10	10	10	10	10	10	10	10	10	10	10	10	10	10	10	10	10	10	10	10	10	10	10	1	1	10	10	10	10	1	1	1	1	1	1	1	1	1	1
	13	49	14	A	14:A		10	10	10	10	10	10	10	10	10	10	10	10	10	10	10	10	10	10	10	10	10	10	10	10	10	10	10	10	10	10	10	10	10	10	1	1	1	1	1	1	1	1	1
		50	14	B	14:B		10	10	10	10	10	10	10	10	10	10	10	10	10	10	10	10	10	10	10	10	10	10	10	10	10	10	1	1	1	1	1	1	1	1	1	1	1	1	1	1	1	1	1
		51	14	C	14:C		1	1	1	1	1	1	1	1	1	1	1	1	1	1	1	1	1	1	1	1	1	1	1	1	1	1	1	1	1	1	1	1	1	1	10	10	10	10	10	10	10	10	10
		52	14	D	14:D		1	1	1	1	1	1	1	1	1	1	1	1	1	1	1	1	1	1	1	1	1	1	1	1	1	1	1	10	10	10	10	10	10	10	10	10	10	10	10	10	10	10	10
	14	53	15	A	15:A		10	10	10	10	10	10	10	10	10	10	10	10	10	10	10	10	10	10	10	10	10	10	10	10	10	10	10	10	10	10	10	10	10	10	10	10	10	10	10	10	10	10	10
		54	15	B	15:B		1	1	1	1	1	1	1	1	1	1	1	1	1	1	1	1	1	1	1	1	1	1	1	1	1	1	1	1	1	1	1	1	1	1	1	1	1	1	1	1	1	1	1
		55	15	C	15:C		10	10	10	10	10	10	10	10	10	10	10	10	10	10	10	10	10	10	10	10	10	10	10	10	10	10	10	1	1	1	1	1	1	10	10	10	10	10	10	10	10	10	10
		56	15	D	15:D		1	1	1	1	1	1	1	1	1	1	1	1	1	1	1	1	1	1	1	1	1	1	1	1	1	1	1	10	10	10	10	10	10	1	1	1	1	1	1	1	1	1	1
	15	57	16	A	16:A		1	1	1	1	1	1	1	1	1	1	1	1	1	1	1	1	1	1	1	1	1	1	1	1	1	1	1	10	10	10	10	10	10	10	10	10	10	10	10	10	10	10	10
		58	16	B	16:B		10	10	10	10	10	10	10	10	10	10	10	10	10	10	10	10	10	10	10	10	10	10	10	10	10	10	10	10	10	10	10	10	10	10	10	10	10	10	10	10	10	10	10
		59	16	C	16:C		1	1	1	1	1	1	1	1	1	1	1	1	1	1	1	1	1	1	1	1	1	1	1	1	1	1	1	1	1	1	1	1	1	1	1	1	1	1	1	1	1	1	1
		60	16	D	16:D		10	10	10	10	10	10	10	10	10	10	10	10	10	10	10	10	10	10	10	10	10	10	10	10	10	10	10	1	1	1	1	1	1	1	1	1	1	1	1	1	1	1	1
	16	61	17	A	17:A		1	1	1	1	1	1	1	1	1	1	1	1	1	1	1	1	1	1	1	1	1	1	1	1	1	1	10	1	1	1	1	1	1	1	1	1	1	1	1	1	1	1	1
		62	17	B	17:B		1	1	1	1	1	1	1	1	1	1	1	1	1	1	1	1	1	1	1	1	1	1	1	1	1	1	1	10	10	10	10	1	1	1	1	1	1	1	1	1	1	1	1
		63	17	C	17:C		10	10	10	10	10	10	10	10	10	10	10	10	10	10	10	10	10	10	10	10	10	10	10	10	10	10	1	10	10	10	10	10	10	10	10	10	10	10	10	10	10	10	10
		64	17	D	17:D		10	10	10	10	10	10	10	10	10	10	10	10	10	10	10	10	10	10	10	10	10	10	10	10	10	10	10	1	1	1	1	10	10	10	10	10	10	10	10	10	10	10	10
	17	65	18	A	18:A		10	10	10	10	10	10	10	10	10	10	10	10	10	10	10	10	10	10	10	10	10	10	10	10	10	10	10	10	10	10	10	10	10	1	1	1	1	1	1	1	1	1	1
		66	18	B	18:B		1	1	1	1	1	1	1	1	1	1	1	1	1	1	1	1	1	1	1	1	1	1	1	1	1	1	1	1	1	1	1	10	10	10	10	10	10	10	10	10	10	10	10
		67	18	C	18:C		10	10	10	10	10	10	10	10	10	10	10	10	10	10	10	10	10	10	10	10	10	10	10	10	10	10	10	10	10	10	10	1	1	1	1	1	1	1	1	1	1	1	1
		68	18	D	18:D		1	1	1	1	1	1	1	1	1	1	1	1	1	1	1	1	1	1	1	1	1	1	1	1	1	1	1	1	1	1	1	1	1	10	10	10	10	10	10	10	10	10	10
	18	69	19	A	19:A		1	1	1	1	1	1	1	1	1	1	1	1	1	1	1	1	1	1	1	1	1	1	1	1	1	1	1	10	10	10	10	10	10	10	10	10	10	10	10	10	10	10	10
		70	19	B	19:B		1	1	1	1	1	1	1	1	1	1	1	1	1	1	1	1	1	1	1	1	10	10	10	10	10	10	10	10	10	10	10	10	10	10	10	10	10	10	10	10	10	10	10
		71	19	C	19:C		10	10	10	10	10	10	10	10	10	10	10	10	10	10	10	10	10	10	10	10	10	10	10	10	10	10	10	1	1	1	1	1	1	1	1	1	1	1	1	1	1	1	1
		72	19	D	19:D		10	10	10	10	10	10	10	10	10	10	10	10	10	10	10	10	10	10	10	10	1	1	1	1	1	1	1	1	1	1	1	1	1	1	1	1	1	1	1	1	1	1	1
	19	73	20	A	20:A		1	1	1	1	1	1	1	1	1	1	1	1	1	1	1	1	1	1	1	1	1	1	1	1	1	1	1	1	1	1	1	1	1	1	1	1	1	1	1	1	1	1	1
		74	20	B	20:B		10	10	10	10	10	10	10	10	10	10	10	10	10	10	10	10	10	10	10	10	10	10	10	10	10	10	10	10	10	1	1	1	1	10	10	10	10	10	10	10	10	10	10
		75	20	C	20:C		1	1	1	1	1	1	1	1	1	1	1	1	1	1	1	1	1	1	1	1	1	1	1	1	1	1	1	10	10	10	10	10	10	1	1	1	1	1	1	1	1	1	1
		76	20	D	20:D		10	10	10	10	10	10	10	10	10	10	10	10	10	10	10	10	10	10	10	10	10	10	10	10	10	10	10	1	1	10	10	10	10	10	10	10	10	10	10	10	10	10	10
	20	77	21	A	21:A		1	1	1	1	1	1	1	1	1	1	1	1	1	1	1	1	1	1	1	1	10	1	1	1	1	1	1	1	1	1	1	1	1	1	1	1	1	1	1	1	1	1	1
		78	21	B	21:B		10	10	10	10	10	10	10	10	10	10	10	10	10	10	10	10	10	10	10	10	10	10	10	10	10	10	10	1	1	10	10	10	10	10	10	10	10	10	10	10	10	10	10
		79	21	C	21:C		10	10	10	10	10	10	10	10	10	10	10	10	10	10	10	10	10	10	10	10	10	10	10	10	10	10	10	10	10	1	1	1	1	1	1	1	1	1	1	1	1	1	1
		80	21	D	21:D		1	1	1	1	1	1	1	1	1	1	1	1	1	1	1	1	1	1	1	1	1	1	1	1	1	1	1	10	10	10	10	10	10	10	10	10	10	10	10	10	10	10	10
	21	81	22	A	22:A		10	10	10	10	10	10	10	10	10	10	10	10	10	10	10	10	10	10	10	10	10	10	10	10	10	10	10	10	1	10	10	10	10	10	10	10	10	10	10	10	10	10	10
		82	22	B	22:B		1	1	1	1	1	1	1	1	1	1	1	1	1	1	1	1	1	1	1	1	1	1	1	1	1	1	1	10	10	1	1	1	1	1	1	1	1	1	1	1	1	1	1
		83	22	C	22:C		1	1	1	1	1	1	1	1	1	1	1	1	1	1	1	1	1	1	1	1	1	1	1	1	1	1	1	1	10	10	10	10	10	10	10	10	10	10	10	10	10	10	10
		84	22	D	22:D		10	10	10	10	10	10	10	10	10	10	10	10	10	10	10	10	10	10	10	10	10	10	10	10	10	10	10	10	10	1	1	1	1	1	1	1	1	1	1	1	1	1	1
	22	85	23	A	23:A		10	10	10	10	10	10	10	10	10	10	10	10	10	10	10	10	10	10	10	10	10	10	10	10	10	10	10	1	1	1	1	1	1	1	1	1	1	1	1	1	1	1	1
		86	23	B	23:B		10	10	10	10	10	10	10	10	10	10	10	10	10	10	10	10	10	10	10	10	10	10	10	10	10	10	10	10	10	10	10	10	10	10	10	10	10	10	10	10	10	10	10
		87	23	C	23:C		1	1	1	1	1	1	1	1	1	1	1	1	1	1	1	1	1	1	1	1	1	10	1	1	1	1	1	1	1	1	1	1	1	1	1	1	1	1	1	1	1	1	1
		88	23	D	23:D		1	1	1	1	1	1	1	1	1	1	1	1	1	1	1	1	1	1	1	1	1	1	1	1	1	1	1	10	10	10	10	10	10	10	10	10	10	10	10	10	10	10	10
	23	89	24	A	24:A		1	1	1	1	1	1	1	1	1	1	1	1	1	1	1	1	1	1	1	1	1	1	1	1	1	1	10	1	1	1	1	1	1	1	1	1	1	1	1	1	1	1	1
		90	24	B	24:B		10	10	10	10	10	10	10	10	10	10	10	10	10	10	10	10	10	10	10	10	10	10	10	10	10	10	1	1	1	1	1	10	10	10	10	10	10	10	10	10	10	10	10
		91	24	C	24:C		1	1	1	1	1	1	1	1	1	1	1	1	1	1	1	1	1	1	1	1	1	1	1	1	1	1	1	10	10	10	10	1	1	1	1	1	1	1	1	1	1	1	1
		92	24	D	24:D		10	10	10	10	10	10	10	10	10	10	10	10	10	10	10	10	10	10	10	10	10	10	10	10	10	10	10	10	10	10	10	10	10	10	10	10	10	10	10	10	10	10	10
	24	93	25	A	25:A		1	1	1	1	1	1	1	1	1	1	1	1	1	1	1	1	1	1	1	1	1	1	1	1	1	1	1	1	1	1	1	1	1	1	1	1	1	1	1	1	1	1	1
		94	25	B	25:B		10	10	10	10	10	10	10	10	10	10	10	10	10	10	10	10	10	10	10	10	10	10	10	10	10	10	10	10	10	10	10	1	1	1	1	1	1	1	1	1	1	1	1
		95	25	C	25:C		1	1	1	1	1	1	1	1	1	1	1	1	1	1	1	1	1	1	1	1	1	1	1	1	1	1	1	1	1	1	1	10	10	10	10	10	10	10	10	10	10	10	10
		96	25	D	25:D		10	10	10	10	10	10	10	10	10	10	10	10	10	10	10	10	10	10	10	10	10	10	10	10	10	10	10	10	10	10	10	10	10	10	10	10	10	10	10	10	10	10	10
	25	97	26	A	26:A		1	1	1	1	1	1	1	1	1	1	1	1	1	1	1	1	1	1	1	1	1	1	10	10	10	10	10	10	10	1	1	1	1	1	1	1	1	1	1	1	1	1	1
		98	26	B	26:B		10	10	10	10	10	10	10	10	10	10	10	10	10	10	10	10	10	10	10	10	10	10	10	10	10	10	10	10	10	10	10	10	10	10	10	10	10	10	10	10	10	10	10
		99	26	C	26:C		1	1	1	1	1	1	1	1	1	1	1	1	1	1	1	1	1	1	1	1	1	1	1	1	1	1	1	1	1	1	1	1	1	10	10	10	10	10	10	10	10	10	10
		100	26	D	26:D		10	10	10	10	10	10	10	10	10	10	10	10	10	10	10	10	10	10	10	10	10	10	1	1	1	1	1	1	1	10	10	10	10	1	1	1	1	1	1	1	1	1	1
	26	101	27	A	27:A		10	10	10	10	10	10	10	10	10	10	10	10	10	10	10	10	10	10	10	10	10	10	10	10	10	10	10	1	1	1	1	1	1	1	1	1	1	1	1	1	1	1	1
		102	27	B	27:B		1	1	1	1	1	1	1	1	1	1	1	1	1	1	1	1	1	1	1	1	1	1	1	1	1	1	1	1	1	1	1	1	1	1	1	1	1	1	1	1	1	1	1
		103	27	C	27:C		1	1	1	1	1	1	1	1	1	1	1	1	1	1	1	1	1	1	1	1	1	1	1	1	1	1	1	10	10	10	10	10	10	10	10	10	10	10	10	10	10	10	10
		104	27	D	27:D		10	10	10	10	10	10	10	10	10	10	10	10	10	10	10	10	10	10	10	10	10	10	10	10	10	10	10	10	10	10	10	10	10	10	10	10	10	10	10	10	10	10	10
	27	105	28	A	28:A		10	10	10	10	10	10	10	10	10	10	10	10	10	10	10	10	10	10	10	10	10	10	10	10	10	10	10	10	10	10	10	10	10	10	10	10	10	10	10	10	10	10	10
		106	28	B	28:B		10	10	10	10	10	10	10	10	10	10	10	10	10	10	10	10	10	10	10	10	10	10	10	10	10	10	10	10	10	10	10	10	10	10	10	10	10	10	10	10	10	10	10
		107	28	C	28:C		1	1	1	1	1	1	1	1	1	1	1	1	1	1	1	1	1	1	1	1	1	1	1	1	1	1	10	1	1	1	1	1	1	1	1	1	1	1	1	1	1	1	1
		108	28	D	28:D		1	1	1	1	1	1	1	1	1	1	1	1	1	1	1	1	1	1	1	1	1	1	1	1	1	1	1	1	1	1	1	1	1	1	1	1	1	1	1	1	1	1	1
	28	109	29	A	29:A		1	1	1	1	1	1	1	1	1	1	1	1	1	1	1	1	1	1	1	1	1	1	1	1	1	1	10	10	10	10	10	1	1	10	10	10	10	10	10	10	10	10	10
		110	29	B	29:B		10	10	10	10	10	10	10	10	10	10	10	10	10	10	10	10	10	10	10	10	10	10	10	10	10	10	10	10	10	10	10	10	10	1	1	1	1	1	1	1	1	1	1
		111	29	C	29:C		1	1	1	1	1	1	1	1	1	1	1	1	1	1	1	1	1	1	1	1	1	1	1	1	1	1	1	1	1	1	1	1	1	1	1	1	1	1	1	1	1	1	1
		112	29	D	29:D		10	10	10	10	10	10	10	10	10	10	10	10	10	10	10	10	10	10	10	10	10	10	10	10	10	10	1	1	1	1	1	10	10	10	10	10	10	10	10	10	10	10	10
	29	113	30	A	30:A		1	1	1	1	1	1	1	1	1	1	1	1	1	1	1	1	1	1	1	1	1	1	1	1	1	1	1	1	1	1	1	1	1	10	10	10	10	10	10	10	10	10	10
		114	30	B	30:B		10	10	10	10	10	10	10	10	10	10	10	10	10	10	10	10	10	10	10	10	10	10	10	10	10	10	10	10	10	10	10	10	10	10	10	10	10	10	10	10	10	10	10
		115	30	C	30:C		1	1	1	1	1	1	1	1	1	1	1	1	1	1	1	1	1	1	1	1	1	1	1	1	1	1	1	1	1	10	10	10	10	1	1	1	1	1	1	1	1	1	1
		116	30	D	30:D		10	10	10	10	10	10	10	10	10	10	10	10	10	10	10	10	10	10	10	10	10	10	10	10	10	10	10	10	10	1	1	1	1	1	1	1	1	1	1	1	1	1	1
	30	117	31	A	31:A		10	10	10	10	10	10	10	10	10	10	10	10	10	10	10	10	10	10	10	10	10	10	10	10	10	10	10	10	10	10	10	10	10	10	10	10	10	10	10	10	10	10	10
		118	31	B	31:B		1	1	1	1	1	1	1	1	1	1	1	1	1	1	1	1	1	1	1	1	1	1	1	1	1	1	1	1	1	1	1	1	1	1	1	1	1	1	1	1	1	1	1
		119	31	C	31:C		10	10	10	10	10	10	10	10	10	10	10	10	10	10	10	10	10	10	10	10	10	10	10	10	10	10	10	1	1	1	1	1	1	1	1	1	1	1	1	1	1	1	1
		120	31	D	31:D		1	1	1	1	1	1	1	1	1	1	1	1	1	1	1	1	1	1	1	1	1	1	1	1	1	1	1	10	1	10	10	10	10	10	10	10	10	10	10	10	10	10	10
	31	121	32	A	32:A		1	1	1	1	1	1	1	1	1	1	1	1	1	1	1	1	1	1	1	1	1	1	1	1	1	1	1	1	1	1	1	1	1	1	1	1	1	1	1	1	1	1	1
		122	32	B	32:B		10	10	10	10	10	10	10	10	10	10	10	10	10	10	10	10	10	10	10	10	10	10	10	10	10	10	10	10	10	10	10	10	10	10	10	10	10	10	10	10	10	10	10
		123	32	C	32:C		10	10	10	10	10	10	10	10	10	10	10	10	10	10	10	10	10	10	10	10	10	10	10	10	10	10	10	10	10	10	10	10	10	10	10	10	10	10	10	10	10	10	10
		124	32	D	32:D		1	1	1	1	1	1	1	1	1	1	1	1	1	1	1	1	1	1	1	1	1	1	1	1	1	1	1	1	1	1	1	1	1	1	1	1	1	1	1	1	1	1	1
	32	125	33	A	33:A		1	1	1	1	1	1	1	1	1	1	1	1	1	1	1	1	1	1	1	1	1	1	1	1	1	1	10	10	10	1	1	10	1	10	10	10	10	10	10	10	10	10	10
		126	33	B	33:B		1	1	1	1	1	1	1	1	1	1	1	1	1	1	1	1	1	1	1	1	1	1	1	1	10	10	1	1	1	1	1	1	1	1	1	1	1	1	1	1	1	1	1
		127	33	C	33:C		10	10	10	10	10	10	10	10	10	10	10	10	10	10	10	10	10	10	10	10	10	10	10	10	1	1	1	1	1	10	10	10	10	10	10	10	10	10	10	10	10	10	10
		128	33	D	33:D		10	10	10	10	10	10	10	10	10	10	10	10	10	10	10	10	10	10	10	10	10	10	10	10	10	10	10	10	10	10	10	1	1	1	10	1	1	1	1	1	1	1	1
	33	129	34	A	34:A		1	1	1	1	1	1	1	1	1	1	1	1	1	1	1	1	1	1	1	1	1	10	10	10	10	10	10	10	10	10	10	10	10	1	1	1	1	1	1	1	1	1	1
		130	34	B	34:B		1	1	1	1	1	1	1	1	1	1	1	1	1	1	1	1	1	1	1	1	1	1	1	1	1	1	1	10	10	10	10	10	10	10	10	10	10	1	1	1	1	1	1
		131	34	C	34:C		10	10	10	10	10	10	10	10	10	10	10	10	10	10	10	10	10	10	10	10	10	10	10	10	10	10	10	1	1	1	1	1	1	1	1	1	10	10	10	10	10	10	10
		132	34	D	34:D		10	10	10	10	10	10	10	10	10	10	10	10	10	10	10	10	10	10	10	10	1	1	1	1	1	1	1	1	1	1	1	1	1	10	10	10	10	10	10	10	10	10	10
	34	133	35	A	35:A		1	1	1	1	1	1	1	1	1	1	1	1	1	1	1	1	1	1	1	1	1	1	1	1	1	1	1	10	10	1	1	1	1	1	1	1	1	1	1	1	1	1	1
		134	35	B	35:B		10	10	10	10	10	10	10	10	10	10	10	10	10	10	10	10	10	10	10	10	1	1	1	1	1	1	1	1	1	10	10	10	10	10	10	10	10	10	10	10	10	10	10
		135	35	C	35:C		10	10	10	10	10	10	10	10	10	10	10	10	10	10	10	10	10	10	10	10	10	10	10	10	10	10	10	10	10	10	10	10	10	10	10	10	10	10	10	10	10	10	10
		136	35	D	35:D		1	1	1	1	1	1	1	1	1	1	1	1	1	1	1	1	1	1	1	1	10	10	10	10	10	10	10	1	1	1	1	1	1	1	1	1	1	1	1	1	1	1	1
	35	137	36	A	36:A		10	10	10	10	10	10	10	10	10	10	10	10	10	10	10	10	10	10	10	10	10	10	10	10	10	10	10	10	10	10	10	10	10	10	10	10	10	10	10	10	10	10	10
		138	36	B	36:B		1	1	1	1	1	1	1	1	1	1	1	1	1	1	1	1	1	1	1	1	1	1	1	1	1	1	1	1	1	1	10	10	10	10	10	10	10	10	10	10	10	10	10
		139	36	C	36:C		10	10	10	10	10	10	10	10	10	10	10	10	10	10	10	10	10	10	10	10	10	10	10	10	10	10	10	10	10	1	1	1	1	10	1	1	1	1	1	1	1	1	1
		140	36	D	36:D		1	1	1	1	1	1	1	1	1	1	1	1	1	1	1	1	1	1	1	1	1	1	1	1	1	1	1	1	1	1	1	1	1	1	1	1	1	1	1	1	1	1	1
	36	141	37	A	37:A		10	10	10	10	10	10	10	10	10	10	10	10	10	10	10	10	10	10	10	10	10	10	10	10	10	10	10	1	1	1	1	1	1	1	1	1	1	1	1	1	1	1	1
		142	37	B	37:B		10	10	10	10	10	10	10	10	10	10	10	10	10	10	10	10	10	10	10	10	10	10	10	10	10	10	10	10	10	10	10	10	10	1	1	1	1	1	1	1	1	1	1
		143	37	C	37:C		1	1	1	1	1	1	1	1	1	1	1	1	1	1	1	1	1	1	1	1	1	1	1	1	1	1	1	10	10	10	10	10	10	10	10	10	10	10	10	10	10	10	10
		144	37	D	37:D		1	1	1	1	1	1	1	1	1	1	1	1	1	1	1	1	1	1	1	1	1	1	1	1	1	1	1	1	1	1	1	1	1	10	10	10	10	10	10	10	10	10	10
	37	145	38	A	38:A		1	1	1	1	1	1	1	1	1	1	1	1	1	1	1	1	1	1	1	1	1	1	1	10	1	1	1	1	1	1	1	1	1	10	10	10	10	10	10	10	10	10	10
		146	38	B	38:B		10	10	10	10	10	10	10	10	10	10	10	10	10	10	10	10	10	10	10	10	10	10	10	10	10	10	10	10	10	10	10	10	10	1	1	1	1	1	1	1	1	1	1
		147	38	C	38:C		1	1	1	1	1	1	1	1	1	1	1	1	1	1	1	1	1	1	1	1	1	1	1	1	1	1	1	1	1	1	1	1	1	1	1	1	1	1	1	1	1	1	1
		148	38	D	38:D		10	10	10	10	10	10	10	10	10	10	10	10	10	10	10	10	10	10	10	10	10	10	10	10	10	10	10	10	10	10	10	10	10	10	10	10	10	10	10	10	10	10	10
	38	149	39	A	39:A		1	1	1	1	1	1	1	1	1	1	1	1	1	1	1	1	1	1	1	1	1	1	1	1	1	1	1	1	1	1	1	1	1	1	1	1	1	1	1	1	1	1	1
		150	39	B	39:B		10	10	10	10	10	10	10	10	10	10	10	10	10	10	10	10	10	10	10	10	10	10	10	10	10	10	10	10	10	10	10	10	10	1	1	1	1	1	1	1	1	1	1
		151	39	C	39:C		10	10	10	10	10	10	10	10	10	10	10	10	10	10	10	10	10	10	10	10	10	10	10	10	10	10	10	10	10	10	10	10	10	10	10	10	10	10	10	10	10	10	10
		152	39	D	39:D		1	1	1	1	1	1	1	1	1	1	1	1	1	1	1	1	1	1	1	1	1	1	1	1	1	1	1	1	1	1	1	1	1	10	10	10	10	10	10	10	10	10	10
	39	153	40	A	40:A		1	1	1	1	1	1	1	1	1	1	1	1	1	1	1	1	1	1	1	1	1	1	1	1	1	1	1	1	1	1	1	1	1	1	1	1	10	10	10	10	10	10	10
		154	40	B	40:B		10	10	10	10	10	10	10	10	10	10	10	10	10	10	10	10	10	10	10	10	10	10	10	10	10	10	10	10	10	10	10	10	10	10	10	10	10	10	10	10	10	10	10
		155	40	C	40:C		10	10	10	10	10	10	10	10	10	10	10	10	10	10	10	10	10	10	10	10	10	10	10	10	10	10	10	1	1	1	1	1	1	1	1	1	1	1	1	1	1	1	1
		156	40	D	40:D		1	1	1	1	1	1	1	1	1	1	1	1	1	1	1	1	1	1	1	1	1	1	1	1	1	1	1	10	10	10	10	10	10	10	10	10	1	1	1	1	1	1	1
	40	157	41	A	41:A		1	1	1	1	1	1	1	1	1	1	1	1	1	1	1	1	1	1	1	1	1	1	1	1	1	1	1	1	1	1	1	1	1	1	1	1	1	1	1	1	1	1	1
		158	41	B	41:B		10	10	10	10	10	10	10	10	10	10	10	10	10	10	10	10	10	10	10	10	10	10	10	10	10	10	10	10	10	10	10	1	1	1	1	1	1	1	1	1	1	1	1
		159	41	C	41:C		1	1	1	1	1	1	1	1	1	1	1	1	1	1	1	1	1	1	1	1	1	1	1	1	1	1	1	1	1	10	10	10	10	10	10	10	10	10	10	10	10	10	10
		160	41	D	41:D		10	10	10	10	10	10	10	10	10	10	10	10	10	10	10	10	10	10	10	10	10	10	10	10	10	10	10	10	10	1	1	10	10	10	10	10	10	10	10	10	10	10	10
	41	161	42	A	42:A		1	1	1	1	1	1	1	1	1	1	1	1	1	1	1	1	1	1	1	1	1	1	1	1	1	1	1	1	1	1	1	1	1	1	1	1	1	1	1	1	1	1	1
		162	42	B	42:B		10	10	10	10	10	10	10	10	10	10	10	10	10	10	10	10	10	10	10	10	10	10	10	10	10	10	10	10	10	10	10	10	10	1	1	1	1	1	1	1	1	1	1
		163	42	C	42:C		1	1	1	1	1	1	1	1	1	1	1	1	1	1	1	1	1	1	1	1	1	1	1	1	1	1	1	1	1	1	1	1	1	10	10	10	10	10	10	10	10	10	10
		164	42	D	42:D		10	10	10	10	10	10	10	10	10	10	10	10	10	10	10	10	10	10	10	10	10	10	10	10	10	10	10	10	10	10	10	10	10	10	10	10	10	10	10	10	10	10	10
	42	165	43	A	43:A		10	10	10	10	10	10	10	10	10	10	10	10	10	10	10	10	10	10	10	10	10	10	10	10	10	10	10	10	10	10	10	10	10	10	10	10	10	10	10	10	10	10	10
		166	43	B	43:B		10	10	10	10	10	10	10	10	10	10	10	10	10	10	10	10	10	10	10	10	10	10	10	10	10	10	10	10	10	10	10	10	10	10	10	10	10	10	10	10	10	10	10
		167	43	C	43:C		1	1	1	1	1	1	1	1	1	1	1	1	1	1	1	1	1	1	1	1	1	1	1	1	1	1	1	1	1	1	1	1	1	1	1	1	1	1	1	1	1	1	1
		168	43	D	43:D		1	1	1	1	1	1	1	1	1	1	1	1	1	1	1	1	1	1	1	1	1	1	1	1	1	1	1	1	1	1	1	1	1	1	1	1	1	1	1	1	1	1	1
	43	169	44	A	44:A		1	1	1	1	1	1	1	1	1	1	1	1	1	1	1	1	1	1	1	1	1	1	1	1	1	1	1	10	10	10	10	10	10	10	10	10	10	10	10	10	10	10	10
		170	44	B	44:B		1	1	1	1	1	1	1	1	1	1	1	1	1	1	1	1	1	1	1	1	1	1	1	1	1	1	1	1	1	1	1	1	1	1	1	1	1	1	1	1	1	1	1
		171	44	C	44:C		10	10	10	10	10	10	10	10	10	10	10	10	10	10	10	10	10	10	10	10	10	10	10	10	10	10	10	10	10	10	10	10	10	10	10	10	10	10	10	10	10	10	10
		172	44	D	44:D		10	10	10	10	10	10	10	10	10	10	10	10	10	10	10	10	10	10	10	10	10	10	10	10	10	10	10	1	1	1	1	1	1	1	1	1	1	1	1	1	1	1	1
	44	173	45	A	45:A		1	1	1	1	1	1	1	1	1	1	1	1	1	1	1	1	1	1	1	10	10	10	10	10	10	10	10	10	10	10	10	10	10	10	10	10	10	10	10	10	10	10	10
		174	45	B	45:B		10	10	10	10	10	10	10	10	10	10	10	10	10	10	10	10	10	10	10	10	1	1	1	1	1	1	1	1	1	1	1	1	1	10	10	10	1	10	10	10	10	10	10
		175	45	C	45:C		10	10	10	10	10	10	10	10	10	10	10	10	10	10	10	10	10	10	10	10	10	10	10	10	10	10	10	1	1	1	1	1	1	1	1	1	1	1	1	1	1	1	1
		176	45	D	45:D		1	1	1	1	1	1	1	1	1	1	1	1	1	1	1	1	1	1	1	1	1	1	1	1	1	1	1	10	10	10	10	10	10	1	1	1	1	1	1	1	1	1	1
	45	177	46	A	46:A		10	10	10	10	10	10	10	10	10	10	10	10	10	10	10	10	10	10	10	10	10	10	10	10	10	10	1	1	1	1	1	1	1	1	1	1	1	1	1	1	1	1	1
		178	46	B	46:B		1	1	1	1	1	1	1	1	1	1	1	1	1	1	1	1	1	1	1	1	1	1	1	1	1	1	1	1	1	1	1	1	1	1	1	1	1	1	1	1	1	1	1
		179	46	C	46:C		1	1	1	1	1	1	1	1	1	1	1	1	1	1	1	1	1	1	1	1	1	1	1	1	1	1	10	10	10	10	10	10	10	10	10	10	10	10	10	10	10	10	10
		180	46	D	46:D		10	10	10	10	10	10	10	10	10	10	10	10	10	10	10	10	10	10	10	10	10	10	10	10	10	10	10	10	10	10	10	10	10	10	10	10	10	10	10	10	10	10	10
	46	181	47	A	47:A		1	1	1	1	1	1	1	1	1	1	1	1	1	1	1	1	1	1	1	1	1	1	1	1	1	1	1	1	1	1	1	1	1	1	1	1	1	1	1	1	1	1	1
		182	47	B	47:B		10	10	10	10	10	10	10	10	10	10	10	10	10	10	10	10	10	10	10	10	10	10	10	10	10	10	10	10	10	10	10	10	10	10	10	10	10	10	10	10	10	10	10
		183	47	C	47:C		1	1	1	1	1	1	1	1	1	1	1	1	1	1	1	1	1	1	1	1	1	1	1	1	1	1	1	1	1	10	10	10	10	10	10	10	10	10	10	10	10	10	10
		184	47	D	47:D		10	10	10	10	10	10	10	10	10	10	10	10	10	10	10	10	10	10	10	10	10	10	10	10	10	10	10	10	10	1	1	1	1	1	1	1	1	1	1	1	1	1	1
	47	185	48	A	48:A		1	1	1	1	1	1	1	1	1	1	1	1	1	1	1	1	1	1	1	1	1	1	1	1	1	1	1	1	1	1	1	1	1	1	1	1	1	1	1	1	1	1	1
		186	48	B	48:B		10	10	10	10	10	10	10	10	10	10	10	10	10	10	10	10	10	10	10	10	10	10	10	10	10	10	10	10	10	10	10	1	1	1	1	1	1	1	1	1	1	1	1
		187	48	C	48:C		10	10	10	10	10	10	10	10	10	10	10	10	10	10	10	10	10	10	10	10	10	10	10	10	10	10	10	10	10	10	10	10	10	10	10	10	10	10	10	10	10	10	10
		188	48	D	48:D		1	1	1	1	1	1	1	1	1	1	1	1	1	1	1	1	1	1	1	1	1	1	1	1	1	1	1	1	1	1	1	1	10	10	10	10	10	10	10	10	10	10	10
	48	189	49	A	49:A		10	10	10	10	10	10	10	10	10	10	10	10	10	10	10	10	10	10	10	10	10	10	10	10	10	10	10	10	1	1	1	1	1	10	10	10	10	10	10	10	10	10	10
		190	49	B	49:B		10	10	10	10	10	10	10	10	10	10	10	10	10	10	10	10	10	10	10	10	10	10	1	1	1	1	1	10	10	10	10	10	10	10	10	10	10	10	10	10	10	10	10
		191	49	C	49:C		1	1	1	1	1	1	1	1	1	1	1	1	1	1	1	1	1	1	1	1	1	1	10	10	10	10	10	10	10	10	10	10	10	1	1	1	1	1	1	1	1	1	1
		192	49	D	49:D		1	1	1	1	1	1	1	1	1	1	1	1	1	1	1	1	1	1	1	1	1	1	1	1	1	1	1	1	1	1	1	1	1	1	1	1	1	1	1	1	1	1	1
	49	193	50	A	50:A		1	1	1	1	1	1	1	1	1	1	1	1	1	1	1	1	1	1	1	1	1	1	1	1	1	1	1	1	1	1	1	1	1	1	1	1	1	1	1	1	1	1	1
		194	50	B	50:B		1	1	1	1	1	1	1	1	1	1	1	1	1	1	1	1	1	1	1	1	1	1	1	1	1	1	1	1	1	1	1	1	1	1	1	1	1	1	1	1	1	1	1
		195	50	C	50:C		10	10	10	10	10	10	10	10	10	10	10	10	10	10	10	10	10	10	10	10	10	10	10	10	10	10	10	10	10	10	10	10	10	10	10	10	10	10	10	10	10	10	10
		196	50	D	50:D		10	10	10	10	10	10	10	10	10	10	10	10	10	10	10	10	10	10	10	10	10	10	10	10	10	10	10	10	10	10	10	10	10	10	10	10	10	10	10	10	10	10	10
	50	197	52	A	52:A		10	10	10	10	10	10	10	10	10	10	10	10	10	10	10	10	10	10	10	10	10	10	10	10	10	10	10	10	10	10	10	10	10	10	10	10	10	10	10	10	10	10	10
		198	52	B	52:B		1	1	1	1	1	1	1	1	1	1	1	1	1	1	1	1	1	1	1	1	1	1	1	1	1	1	1	1	1	1	1	10	10	10	10	10	10	10	10	10	10	10	10
		199	52	C	52:C		1	1	1	1	1	1	1	1	1	1	1	1	1	1	1	1	1	1	1	1	1	1	1	1	1	1	1	1	1	1	1	1	1	1	1	1	1	1	1	1	1	1	1
		200	52	D	52:D		10	10	10	10	10	10	10	10	10	10	10	10	10	10	10	10	10	10	10	10	10	10	10	10	10	10	10	10	10	10	10	10	1	1	1	1	1	1	1	1	1	1	1
	51	201	53	A	53:A		1	1	1	1	1	1	1	1	1	1	1	1	1	1	1	1	1	1	1	1	1	1	1	1	1	1	1	1	1	1	1	1	1	1	1	1	1	1	1	1	1	1	1
		202	53	B	53:B		10	10	10	10	10	10	10	10	10	10	10	10	10	10	10	10	10	10	10	10	10	10	10	10	10	10	10	10	10	10	10	10	10	10	10	10	10	10	10	10	10	10	10
		203	53	C	53:C		1	1	1	1	1	1	1	1	1	1	1	1	1	1	1	1	1	1	1	1	1	1	1	1	1	1	1	1	1	1	1	1	1	10	10	10	10	10	10	10	10	10	10
		204	53	D	53:D		10	10	10	10	10	10	10	10	10	10	10	10	10	10	10	10	10	10	10	10	10	10	10	10	10	10	10	10	10	10	10	10	10	1	1	1	1	1	1	1	1	1	1
	52	205	54	A	54:A		10	10	10	10	10	10	10	10	10	10	10	10	10	10	10	10	10	10	10	10	10	10	10	10	10	10	10	1	1	1	1	1	1	1	1	1	1	1	1	1	1	1	1
		206	54	B	54:B		1	1	1	1	1	1	1	1	1	1	1	1	1	1	1	1	1	1	1	1	1	1	1	1	1	1	1	10	10	10	10	10	10	10	10	10	10	10	10	10	10	10	10
		207	54	C	54:C		1	1	1	1	1	1	1	1	1	1	1	1	1	1	1	1	1	1	1	1	1	1	1	1	1	1	1	1	1	1	1	1	1	1	1	1	1	1	1	1	1	1	1
		208	54	D	54:D		10	10	10	10	10	10	10	10	10	10	10	10	10	10	10	10	10	10	10	10	10	10	10	10	10	10	10	10	10	10	10	10	10	10	10	10	10	10	10	10	10	10	10
	53	209	55	A	55:A		10	10	10	10	10	10	10	10	10	10	10	10	10	10	10	10	10	10	10	10	10	10	10	10	10	10	10	1	1	1	1	1	1	1	1	1	1	1	1	1	1	1	1
		210	55	B	55:B		1	1	1	1	1	1	1	1	1	1	1	1	1	1	1	1	1	1	1	1	1	1	1	1	1	1	1	10	10	10	10	10	10	10	10	10	10	10	10	10	10	10	10
		211	55	C	55:C		10	10	10	10	10	10	10	10	10	10	10	10	10	10	10	10	10	10	10	10	10	10	10	10	10	10	10	10	10	10	10	1	1	1	1	1	1	1	1	1	1	1	1
		212	55	D	55:D		1	1	1	1	1	1	1	1	1	1	1	1	1	1	1	1	1	1	1	1	1	1	1	1	1	1	1	1	1	1	1	10	10	10	10	10	10	10	10	10	10	10	10
	54	213	56	A	56:A		10	10	10	10	10	10	10	10	10	10	10	10	10	10	10	10	10	10	10	10	10	10	10	10	10	10	1	10	10	10	10	10	10	1	1	1	1	1	1	1	1	1	1
		214	56	B	56:B		10	10	10	10	10	10	10	10	10	10	10	10	10	10	10	10	10	10	10	10	10	10	10	10	10	10	10	10	10	10	10	10	10	10	10	10	10	10	10	10	10	10	10
		215	56	C	56:C		10	10	10	10	10	10	10	10	10	10	10	10	10	10	10	10	10	10	10	10	10	10	10	10	10	10	10	1	1	1	1	1	1	10	10	10	10	10	10	10	10	10	10
		216	56	D	56:D		1	1	1	1	1	1	1	1	1	1	1	1	1	1	1	1	1	1	1	1	1	1	1	1	1	1	1	10	10	10	10	10	10	1	1	1	1	1	1	1	1	1	1
	55	217	57	A	57:A		10	10	10	10	10	10	10	10	10	10	10	10	10	10	10	10	10	10	10	10	10	10	10	10	10	10	10	10	10	10	10	10	10	1	1	1	1	1	1	1	1	1	1
		218	57	B	57:B		1	1	1	1	1	1	1	1	1	1	1	1	1	1	1	1	1	1	1	1	1	1	1	1	1	1	1	1	1	1	1	1	1	1	1	1	1	1	1	1	10	10	10
		219	57	C	57:C		1	1	1	1	1	1	1	1	1	1	1	1	1	1	1	1	1	1	1	1	1	1	1	1	1	1	1	1	1	1	1	1	1	10	10	10	10	10	10	10	10	10	10
		220	57	D	57:D		10	10	10	10	10	10	10	10	10	10	10	10	10	10	10	10	10	10	10	10	10	10	10	10	10	10	10	10	10	10	10	10	10	10	10	10	10	10	10	10	1	1	1
	56	221	58	A	58:A		1	1	1	1	1	1	1	1	1	1	1	1	1	1	1	1	1	1	1	1	1	1	1	1	1	1	1	1	1	1	1	1	1	1	1	1	1	1	1	1	1	1	1
		222	58	B	58:B		10	10	10	10	10	10	10	10	10	10	10	10	10	10	10	10	10	10	10	10	10	10	10	10	10	10	10	10	10	10	10	1	1	1	1	1	1	1	1	1	1	1	1
		223	58	C	58:C		10	10	10	10	10	10	10	10	10	10	10	10	10	10	10	10	10	10	10	10	10	10	10	10	10	10	10	10	10	10	10	10	10	10	10	10	10	10	10	10	10	10	10
		224	58	D	58:D		1	1	1	1	1	1	1	1	1	1	1	1	1	1	1	1	1	1	1	1	1	1	1	1	1	1	1	1	1	1	1	1	10	10	10	10	10	10	10	10	10	10	10
	57	225	59	A	59:A		1	1	1	1	1	1	1	1	1	1	1	1	1	1	1	1	1	1	1	1	1	1	1	1	1	1	1	1	1	1	1	1	1	1	1	1	1	1	1	1	1	1	1
		226	59	B	59:B		1	1	1	1	1	1	1	1	1	1	1	1	1	1	1	1	1	1	1	1	1	1	1	1	1	1	1	1	1	1	1	10	10	10	10	10	10	10	10	10	10	10	10
		227	59	C	59:C		10	10	10	10	10	10	10	10	10	10	10	10	10	10	10	10	10	10	10	10	10	10	10	10	10	10	10	10	10	10	10	10	10	10	10	10	10	10	10	10	10	10	10
		228	59	D	59:D		10	10	10	10	10	10	10	10	10	10	10	10	10	10	10	10	10	10	10	10	10	10	10	10	10	10	10	10	10	10	10	1	1	1	1	1	1	1	1	1	1	1	1
	58	229	60	A	60:A		1	1	1	1	1	1	1	1	1	1	1	1	1	1	1	1	1	1	1	1	1	1	1	1	1	1	1	1	1	10	10	10	10	10	10	10	10	10	10	10	10	10	10
		230	60	B	60:B		1	1	1	1	1	1	1	1	1	1	10	1	1	1	1	1	1	1	1	1	1	1	1	1	1	1	1	1	1	1	1	1	1	1	1	1	1	1	1	1	1	1	1
		231	60	C	60:C		10	10	10	10	10	10	10	10	10	10	10	10	10	10	10	10	10	10	10	10	10	10	10	10	10	10	10	10	10	10	10	10	10	10	10	10	10	10	10	10	10	10	10
		232	60	D	60:D		10	10	10	10	10	10	10	10	10	10	10	10	10	10	10	10	10	10	10	10	10	10	10	10	10	10	10	10	10	1	1	1	1	1	1	1	1	1	1	1	1	1	1
	59	233	61	A	61:A		10	10	10	10	10	10	10	10	10	10	10	10	10	10	10	10	10	10	10	10	10	10	10	10	10	10	10	1	1	1	1	1	1	1	1	1	1	1	1	1	10	10	10
		234	61	B	61:B		10	10	10	10	10	10	10	10	10	10	10	10	10	10	10	10	10	10	10	10	10	10	10	10	10	10	10	10	10	10	10	10	10	10	10	10	10	10	10	10	10	10	10
		235	61	C	61:C		1	1	1	1	1	1	1	1	1	1	1	1	1	1	1	1	1	1	1	1	1	1	1	1	1	1	1	10	10	10	10	10	10	10	10	10	10	10	10	10	10	10	10
		236	61	D	61:D		1	1	1	1	1	1	1	1	1	1	1	1	1	1	1	1	1	1	1	1	1	1	1	1	1	1	1	1	1	1	1	1	1	1	1	1	1	1	1	1	10	10	10
	60	237	62	A	62:A		1	1	1	1	1	1	1	1	1	1	1	1	1	1	1	1	1	1	1	1	1	1	1	1	1	1	1	10	10	10	10	10	10	10	10	10	10	10	10	10	10	10	10
		238	62	B	62:B		10	10	10	10	10	10	10	10	10	10	10	10	10	10	10	10	10	10	10	10	10	10	10	10	10	10	10	10	10	10	10	10	10	10	10	10	10	10	10	10	10	10	10
		239	62	C	62:C		1	1	1	1	1	1	1	1	1	1	1	1	1	1	1	1	1	1	1	1	1	1	1	1	1	1	1	1	1	1	1	1	1	1	1	1	1	1	1	1	1	1	1
		240	62	D	62:D		10	10	10	10	10	10	10	10	10	10	10	10	10	10	10	10	10	10	10	10	10	10	10	10	10	10	10	1	1	1	1	1	1	1	1	1	1	1	1	1	1	1	1
	61	241	63	A	63:A		10	10	10	10	10	10	10	10	10	10	10	10	10	10	10	10	10	10	10	10	10	10	10	10	10	10	10	10	10	10	10	1	1	1	1	1	1	1	1	1	1	1	1
		242	63	B	63:B		1	1	1	1	1	1	1	1	1	1	1	1	1	1	1	1	1	1	1	1	1	1	1	1	1	1	1	1	1	1	1	1	1	10	10	10	10	10	10	10	10	10	10
		243	63	C	63:C		10	10	10	10	10	10	10	10	10	10	10	10	10	10	10	10	10	10	10	10	10	10	10	10	10	10	10	1	1	1	1	10	10	1	1	1	1	1	1	1	1	1	1
		244	63	D	63:D		1	1	1	1	1	1	1	1	1	1	1	1	1	1	1	1	1	1	1	1	1	1	1	1	1	1	1	10	10	10	10	10	10	10	10	10	10	10	10	10	10	10	10
	62	245	64	A	64:A		1	1	1	1	1	1	1	1	1	1	1	1	1	1	1	1	1	1	1	1	1	1	1	1	1	1	1	10	10	10	10	1	1	1	1	1	1	1	1	1	1	1	1
		246	64	B	64:B		1	1	1	1	1	1	1	1	1	1	1	1	1	1	1	1	1	1	1	1	1	1	1	1	1	1	1	1	1	1	1	1	1	1	1	1	1	1	1	1	1	1	1
		247	64	C	64:C		10	10	10	10	10	10	10	10	10	10	10	10	10	10	10	10	10	10	10	10	10	10	10	10	10	10	10	10	10	10	10	10	10	10	10	10	10	10	10	10	10	10	10
		248	64	D	64:D		10	10	10	10	10	10	10	10	10	10	10	10	10	10	10	10	10	10	10	10	10	10	10	10	10	10	10	1	1	1	1	10	10	10	10	10	10	10	10	10	10	10	10
	63	249	65	A	65:A		10	10	10	10	10	10	10	10	10	10	10	10	10	10	10	10	10	10	10	10	1	1	1	1	1	1	1	1	1	1	1	10	10	10	10	10	10	10	10	10	10	10	10
		250	65	B	65:B		10	10	10	10	10	10	10	10	10	10	10	10	10	10	10	10	10	10	10	10	10	10	10	10	10	10	10	10	10	10	10	10	10	10	10	10	10	10	10	10	10	10	10
		251	65	C	65:C		1	1	1	1	1	1	1	1	1	1	1	1	1	1	1	1	1	1	1	1	10	10	10	10	10	10	10	10	10	10	10	1	1	1	1	1	1	1	1	1	1	1	1
		252	65	D	65:D		1	1	1	1	1	1	1	1	1	1	1	1	1	1	1	1	1	1	1	1	1	1	1	1	1	1	1	1	1	1	1	1	1	1	1	1	1	1	1	1	1	1	1
	64	253	66	A	66:A		1	1	1	1	1	1	1	1	1	1	1	1	1	1	1	1	1	1	1	1	1	1	1	1	1	1	*	10	10	10	10	10	10	10	10	10	10	10	10	10	10	10	10
		254	66	B	66:B		10	10	10	10	10	10	10	10	10	10	10	10	10	10	10	10	10	10	10	10	1	1	1	1	1	1	*	1	1	1	1	10	10	10	10	10	10	10	10	10	10	10	10
		255	66	C	66:C		1	1	1	1	1	1	1	1	1	1	1	1	1	1	1	1	1	1	1	1	10	10	10	10	10	10	*	1	1	1	1	1	1	1	1	1	1	1	1	1	1	1	1
		256	66	D	66:D		10	10	10	10	10	10	10	10	10	10	10	10	10	10	10	10	10	10	10	10	10	10	10	10	10	10	*	10	10	10	10	1	1	1	1	1	1	1	1	1	1	1	1
	65	257	67	A	67:A		10	10	10	10	10	10	10	10	10	10	10	10	10	10	10	10	10	10	10	10	10	10	10	10	10	10	10	10	10	10	10	10	10	10	10	10	10	10	10	10	10	10	10
		258	67	B	67:B		1	1	1	1	1	1	1	1	1	1	1	1	1	1	1	1	1	1	1	1	1	1	1	1	1	1	1	1	1	1	1	1	1	1	1	1	1	1	1	1	1	1	1
		259	67	C	67:C		1	1	1	1	1	1	1	1	1	1	1	1	1	1	1	1	1	1	1	1	1	1	1	1	1	1	1	10	10	10	10	10	10	10	10	10	10	10	10	10	10	10	10
		260	67	D	67:D		10	10	10	10	10	10	10	10	10	10	10	10	10	10	10	10	10	10	10	10	10	10	10	10	10	10	10	1	1	1	1	1	1	1	1	1	1	1	1	1	1	1	1
	66	261	68	A	68:A		1	1	1	1	1	1	1	1	1	1	1	1	1	1	1	1	1	1	1	1	1	1	1	1	1	1	1	1	1	1	1	1	1	1	1	1	1	1	1	1	1	1	1
		262	68	B	68:B		1	1	1	1	1	1	1	1	1	1	1	1	1	1	1	1	1	1	1	1	1	1	1	1	10	10	10	10	10	10	10	1	1	1	1	1	1	1	1	1	1	1	1
		263	68	C	68:C		10	10	10	10	10	10	10	10	10	10	10	10	10	10	10	10	10	10	10	10	10	10	10	10	10	10	10	10	10	10	10	10	10	10	10	10	10	10	10	10	10	10	10
		264	68	D	68:D		10	10	10	10	10	10	10	10	10	10	10	10	10	10	10	10	10	10	10	10	10	10	10	10	1	1	1	1	1	1	1	10	10	10	10	10	10	10	10	10	10	10	10
	67	265	69	A	69:A		1	1	1	1	1	1	1	1	1	1	1	1	1	1	1	1	1	1	1	1	1	1	1	1	10	10	10	10	10	1	1	1	1	1	1	1	1	1	1	1	1	1	1
		266	69	B	69:B		10	10	10	10	10	10	10	10	10	10	10	10	10	10	10	10	10	10	10	10	10	10	10	1	1	1	1	1	1	1	1	1	1	1	1	1	1	1	1	1	1	1	1
		267	69	C	69:C		1	1	1	1	1	1	1	1	1	1	1	1	1	1	1	1	1	1	1	1	1	1	1	1	1	1	1	1	1	10	10	10	10	10	10	10	10	10	10	10	10	10	10
		268	69	D	69:D		10	10	10	10	10	10	10	10	10	10	10	10	10	10	10	10	10	10	10	10	10	10	10	10	10	10	10	10	10	10	10	10	10	10	10	10	10	10	10	10	10	10	10
	68	269	70	A	70:A		10	10	10	10	10	10	10	10	10	10	10	10	10	10	10	10	10	10	10	10	10	10	10	10	10	10	10	1	1	1	1	1	1	1	1	1	1	1	1	1	1	1	1
		270	70	B	70:B		1	1	1	1	1	1	1	1	1	1	1	1	1	1	1	1	1	1	1	1	1	1	1	1	1	1	1	10	10	10	10	10	10	10	10	10	10	10	10	10	10	10	10
		271	70	C	70:C		1	1	1	1	1	1	1	1	1	1	1	1	1	1	1	1	1	1	1	1	1	1	1	1	1	1	1	1	10	10	10	10	10	10	10	10	10	10	10	10	10	10	10
		272	70	D	70:D		10	10	10	10	10	10	10	10	10	10	10	10	10	10	10	10	10	10	10	10	10	10	10	10	10	10	10	10	10	1	1	1	1	1	1	1	1	1	1	1	1	1	1
	69	273	71	A	71:A		10	10	10	10	10	10	10	10	10	10	10	10	10	10	10	10	10	10	10	10	10	10	10	10	10	10	10	10	10	10	10	10	10	10	10	10	10	10	10	10	10	10	10
		274	71	B	71:B		1	1	1	1	1	1	1	1	1	1	1	1	1	1	1	1	1	1	1	1	1	1	1	1	1	1	1	1	1	1	1	1	1	1	1	1	1	1	1	1	1	1	1
		275	71	C	71:C		1	1	1	1	1	1	1	1	1	1	1	1	1	1	1	1	1	1	1	1	1	1	1	10	10	10	10	10	10	10	10	10	10	1	1	1	1	1	1	1	1	1	1
		276	71	D	71:D		10	10	10	10	10	10	10	10	10	10	10	10	10	10	10	10	10	10	10	10	10	10	10	10	1	1	1	1	1	1	1	1	1	10	10	10	10	10	10	10	10	10	10
	70	277	72	A	72:A		1	1	1	1	1	1	1	1	1	1	1	1	1	1	1	1	1	1	1	1	1	1	1	1	1	1	1	1	1	1	1	1	1	1	1	1	1	1	1	1	1	1	1
		278	72	B	72:B		10	10	10	10	10	10	10	10	10	10	10	10	10	10	10	10	10	10	10	10	10	10	10	10	10	10	10	1	1	1	1	10	10	10	10	10	10	10	10	10	10	10	10
		279	72	C	72:C		1	1	1	1	1	1	1	1	1	1	1	1	1	1	1	1	1	1	1	1	1	1	1	1	1	1	1	10	10	10	10	10	10	10	10	10	10	10	10	10	10	10	10
		280	72	D	72:D		10	10	10	10	10	10	10	10	10	10	10	10	10	10	10	10	10	10	10	10	10	10	10	10	10	10	10	10	10	10	10	1	1	1	1	1	1	1	1	1	1	1	1
	71	281	73	A	73:A		1	1	1	1	1	1	1	1	1	1	1	1	1	1	1	1	1	1	1	1	1	1	1	1	1	1	1	10	10	10	10	10	10	10	10	10	10	10	10	10	10	10	10
		282	73	B	73:B		10	10	10	10	10	10	10	10	10	10	10	10	10	10	10	10	10	10	10	10	10	10	10	10	10	10	10	10	10	10	10	10	10	10	10	10	10	10	10	10	10	10	10
		283	73	C	73:C		1	1	1	1	1	1	1	1	1	1	1	1	1	1	1	1	1	1	1	1	1	1	1	1	1	1	1	1	1	1	1	1	1	1	1	1	1	1	1	1	1	1	1
		284	73	D	73:D		10	10	10	10	10	10	10	10	10	10	10	10	10	10	10	10	10	10	10	10	10	10	10	10	10	10	10	1	1	1	1	1	1	1	1	1	1	1	1	1	1	1	1
	72	285	74	A	74:A		1	1	1	1	1	1	1	1	1	1	1	1	1	1	1	1	1	1	1	1	1	1	1	1	1	1	1	1	1	1	1	1	1	1	1	1	1	1	1	1	1	1	1
		286	74	B	74:B		1	1	1	1	1	1	1	1	1	1	1	1	1	1	1	1	1	1	1	1	1	1	1	1	1	1	1	10	10	10	10	10	10	1	10	10	10	10	10	10	10	10	10
		287	74	C	74:C		10	10	10	10	10	10	10	10	10	10	10	10	10	10	10	10	10	10	10	10	10	10	10	10	10	10	10	1	1	1	1	1	1	1	1	1	1	1	1	1	1	1	1
		288	74	D	74:D		10	10	10	10	10	10	10	10	10	10	10	10	10	10	10	10	10	10	10	10	10	10	10	10	10	10	10	10	10	10	10	10	10	10	10	10	10	10	10	10	10	10	10
	73	289	75	A	75:A		10	10	10	10	10	10	10	10	10	10	10	10	10	10	10	10	10	10	10	10	10	10	10	10	10	10	10	10	10	10	10	1	1	1	1	1	1	1	1	1	1	1	1
		290	75	B	75:B		1	1	1	1	1	1	1	1	1	1	1	1	1	1	1	1	1	1	1	1	1	1	1	1	1	1	1	10	1	1	1	1	1	1	1	1	1	1	1	1	1	1	1
		291	75	C	75:C		10	10	10	10	10	10	10	10	10	10	10	10	10	10	10	10	10	10	10	10	10	10	10	10	10	10	10	1	1	1	1	10	10	10	10	10	10	10	10	10	10	10	10
		292	75	D	75:D		1	1	1	1	1	1	1	1	1	1	1	1	1	1	1	1	1	1	1	1	1	1	1	1	1	1	1	1	1	10	10	10	10	10	10	10	10	10	10	10	10	10	10
	74	293	76	A	76:A		10	10	10	10	10	10	10	10	10	10	10	10	10	10	10	10	10	10	10	10	10	10	10	10	10	10	10	1	1	1	1	1	1	1	1	1	1	1	1	1	1	1	1
		294	76	B	76:B		10	10	10	10	10	10	10	10	10	10	10	10	10	10	10	10	10	10	10	10	10	10	10	10	10	10	10	10	10	10	10	10	10	10	10	10	10	10	10	10	10	10	10
		295	76	C	76:C		1	1	1	1	1	1	1	1	1	1	1	1	1	1	1	1	1	1	1	1	1	1	1	1	1	1	1	10	10	10	10	10	10	10	10	10	10	10	10	10	10	10	10
		296	76	D	76:D		1	1	1	1	1	1	1	1	1	1	1	1	1	1	1	1	1	1	1	1	1	1	1	1	1	1	1	1	1	1	1	1	1	1	1	1	1	1	1	1	1	1	1
	75	297	77	A	77:A		1	1	1	1	1	1	1	1	1	1	1	1	1	1	1	1	1	1	1	1	10	10	1	1	1	1	10	10	10	10	10	10	10	10	10	10	10	10	10	10	10	10	10
		298	77	B	77:B		1	1	1	1	1	1	1	1	1	1	1	1	1	1	1	1	1	1	1	1	1	1	1	1	1	1	1	1	1	1	1	1	1	1	1	1	1	1	1	1	1	1	1
		299	77	C	77:C		10	10	10	10	10	10	10	10	10	10	10	10	10	10	10	10	10	10	10	10	10	10	10	10	10	10	10	10	10	1	1	10	10	10	10	10	10	10	10	10	10	10	10
		300	77	D	77:D		10	10	10	10	10	10	10	10	10	10	10	10	10	10	10	10	10	10	10	10	10	10	10	10	10	1	1	1	1	10	10	1	1	1	1	1	1	1	1	1	1	1	1
	76	301	78	A	78:A		10	10	10	10	10	10	10	10	10	10	10	10	10	10	10	10	10	10	10	10	10	10	10	10	10	10	10	1	1	1	1	1	1	1	1	1	1	1	1	1	1	1	1
		302	78	B	78:B		1	1	1	1	1	1	1	1	1	1	1	1	1	1	1	1	1	1	1	1	1	1	1	1	1	1	1	10	10	10	10	10	10	10	10	10	10	10	10	10	10	10	10
		303	78	C	78:C		1	1	1	1	1	1	1	1	1	1	1	1	1	1	1	1	1	1	1	1	1	1	1	1	1	1	1	1	1	1	1	1	1	1	1	1	1	1	1	1	1	1	1
		304	78	D	78:D		10	10	10	10	10	10	10	10	10	10	10	10	10	10	10	10	10	10	10	10	10	10	10	10	10	10	10	10	10	10	10	10	10	10	10	10	10	10	10	10	10	10	10
	77	305	79	A	79:A		10	10	10	10	10	10	10	10	10	10	10	10	10	10	10	10	10	10	10	10	10	10	10	10	10	10	10	1	1	1	1	1	1	10	10	10	10	10	10	10	10	10	10
		306	79	B	79:B		1	1	1	1	1	1	1	1	1	1	1	1	1	1	1	1	1	1	1	1	1	1	1	1	1	10	10	1	1	1	1	1	1	1	1	1	1	1	1	1	1	1	1
		307	79	C	79:C		1	1	1	1	1	1	1	1	1	1	1	1	1	1	1	1	1	1	1	1	1	1	1	1	1	1	1	10	10	10	10	10	10	10	10	10	10	10	10	10	10	10	10
		308	79	D	79:D		10	10	10	10	10	10	10	10	10	10	10	10	10	10	10	10	10	10	10	10	10	10	10	10	10	10	1	10	10	10	10	10	10	1	1	1	1	1	1	1	1	1	1
	78	309	80	A	80:A		10	10	10	10	10	10	10	10	10	10	10	10	10	10	10	10	10	10	10	10	10	10	10	10	10	10	10	10	10	10	10	10	10	10	10	10	10	10	10	10	10	10	10
		310	80	B	80:B		1	1	1	1	1	1	1	1	1	1	1	1	1	1	1	1	1	1	1	1	1	1	1	1	1	1	1	1	1	1	1	1	1	1	1	1	1	1	1	1	1	1	1
		311	80	C	80:C		1	1	1	1	1	1	1	1	1	1	1	1	1	1	1	1	1	1	1	1	1	1	1	1	1	1	1	1	1	10	10	10	10	10	10	10	10	10	10	10	10	10	10
		312	80	D	80:D		10	10	10	10	10	10	10	10	10	10	10	10	10	10	10	10	10	10	10	10	10	10	10	10	10	10	10	10	10	1	1	1	1	1	1	1	1	1	1	1	1	1	1
	79	313	81	A	81:A		1	1	1	1	1	1	1	1	1	1	1	1	1	1	1	1	1	1	1	1	1	1	1	1	1	1	1	10	10	10	10	10	10	1	1	1	1	1	1	1	1	1	1
		314	81	B	81:B		10	10	10	10	10	10	10	10	10	10	10	10	10	10	10	10	10	10	10	10	10	10	10	10	10	10	10	1	1	1	1	1	1	10	10	10	10	10	10	10	10	10	10
		315	81	C	81:C		1	1	1	1	1	1	1	1	1	1	1	1	1	1	1	1	1	1	1	1	1	1	1	1	1	1	1	1	1	1	1	1	1	1	1	1	1	1	1	1	1	1	1
		316	81	D	81:D		10	10	10	10	10	10	10	10	10	10	10	10	10	10	10	10	10	10	10	10	10	10	10	10	10	10	10	10	10	10	10	10	10	10	10	10	10	10	10	10	10	10	10
	80	317	82	A	82:A		10	10	10	10	10	10	10	10	10	10	10	10	10	10	10	10	10	10	10	10	10	10	10	10	10	10	10	10	10	10	10	10	10	10	10	10	10	10	10	10	10	10	10
		318	82	B	82:B		10	10	10	10	10	10	10	10	10	10	10	10	10	10	10	10	10	10	10	10	10	10	10	10	10	10	10	1	1	1	1	10	10	10	10	10	10	10	10	10	10	10	10
		319	82	C	82:C		1	1	1	1	1	1	1	1	1	1	1	1	1	1	1	1	1	1	1	1	1	1	1	1	1	1	1	10	10	10	10	1	1	1	1	1	1	1	1	1	1	1	1
		320	82	D	82:D		1	1	1	1	1	1	1	1	1	1	1	1	1	1	1	1	1	1	1	1	1	1	1	1	1	1	1	1	1	1	1	1	1	1	1	1	1	1	1	1	1	1	1
	81	321	83	A	83:A		10	10	10	10	10	10	10	10	10	10	10	10	10	10	10	10	10	10	10	10	10	10	10	10	10	10	10	10	10	10	10	10	10	1	1	1	1	1	1	1	1	1	1
		322	83	B	83:B		1	1	1	1	1	1	1	1	1	1	1	1	1	1	1	1	1	1	1	1	1	1	1	1	1	1	1	1	1	1	1	1	1	10	10	10	10	10	10	10	10	10	10
		323	83	C	83:C		10	10	10	10	10	10	10	10	10	10	10	10	10	10	10	10	10	10	10	10	10	10	10	10	10	10	10	1	1	1	1	1	1	1	1	1	1	1	1	1	1	1	1
		324	83	D	83:D		1	1	1	1	1	1	1	1	1	1	1	1	1	1	1	1	1	1	1	1	1	1	1	1	1	1	1	10	10	10	10	10	10	10	10	10	10	10	10	10	10	10	10
	82	325	84	A	84:A		1	1	1	1	1	1	1	1	1	1	1	1	1	1	1	1	1	1	1	1	10	10	10	10	10	10	10	10	10	10	10	10	10	10	10	10	10	10	10	10	10	10	10
		326	84	B	84:B		10	10	10	10	10	10	10	10	10	10	10	10	10	10	10	10	10	10	10	10	10	10	10	10	10	10	1	1	1	1	1	10	10	10	10	10	10	10	10	10	10	10	10
		327	84	C	84:C		10	10	10	10	10	10	10	10	10	10	10	10	10	10	10	10	10	10	10	10	1	1	1	1	1	1	1	1	1	1	1	1	1	1	1	1	1	1	1	1	1	1	1
		328	84	D	84:D		1	1	1	1	1	1	1	1	1	1	1	1	1	1	1	1	1	1	1	1	1	1	1	1	1	1	10	10	10	10	10	1	1	1	1	1	1	1	1	1	1	1	1
	83	329	85	A	85:A		10	10	10	10	10	10	10	10	10	10	10	10	10	10	10	10	10	10	10	10	1	1	1	1	1	1	1	1	1	1	1	1	1	1	1	1	1	1	1	1	1	1	1
		330	85	B	85:B		10	10	10	10	10	10	10	10	10	10	10	10	10	10	10	10	10	10	10	10	10	10	10	10	10	10	10	10	10	10	10	10	10	10	10	10	10	10	10	10	10	10	10
		331	85	C	85:C		1	1	1	1	1	1	1	1	1	1	1	1	1	1	1	1	1	1	1	1	10	10	10	10	10	10	10	1	1	1	1	1	1	1	1	1	1	1	1	1	1	1	1
		332	85	D	85:D		1	1	1	1	1	1	1	1	1	1	1	1	1	1	1	1	1	1	1	1	1	1	1	1	1	1	1	10	10	10	10	10	10	10	10	10	10	10	10	10	10	10	10
	84	333	86	A	86:A		10	10	10	10	10	10	10	10	10	10	10	10	10	10	10	10	10	10	10	10	10	10	10	10	10	10	10	10	10	10	10	10	10	1	1	1	1	1	1	1	1	1	1
		334	86	B	86:B		1	1	1	1	1	1	1	1	1	1	1	1	1	1	1	1	1	1	1	1	1	1	1	1	1	1	1	1	1	1	1	1	1	10	10	10	10	10	10	10	10	10	10
		335	86	C	86:C		10	10	10	10	10	10	10	10	10	10	10	10	1	1	1	10	1	1	1	1	1	1	1	1	1	10	10	10	10	10	10	10	10	10	10	10	10	10	10	10	10	10	10
		336	86	D	86:D		1	1	1	1	1	1	1	1	1	1	1	1	1	10	10	1	10	10	10	10	10	10	10	10	10	1	1	1	1	1	1	1	1	1	1	1	1	1	1	1	1	1	1
	85	337	87	A	87:A		1	1	1	1	1	1	1	1	1	1	1	1	1	1	1	1	1	1	1	1	1	10	10	10	10	10	10	10	10	10	10	10	10	10	10	10	10	10	10	10	10	10	10
		338	87	B	87:B		10	10	10	10	10	10	10	10	10	10	10	10	10	10	10	10	10	10	10	10	10	10	10	10	10	10	10	10	10	10	10	1	1	1	1	1	1	1	1	1	1	1	1
		339	87	C	87:C		10	10	10	10	10	10	10	10	10	10	10	10	10	10	10	10	10	10	10	10	10	1	1	1	1	1	1	1	1	1	1	1	1	1	1	1	1	1	1	1	1	1	1
		340	87	D	87:D		1	1	1	1	1	1	1	1	1	1	1	1	1	1	1	1	1	1	1	1	1	1	1	1	1	1	1	1	1	1	1	10	10	10	10	10	10	10	10	10	10	10	10
	86	341	88	A	88:A		1	1	1	1	1	1	1	1	1	1	1	1	1	1	1	1	1	1	1	1	1	1	1	1	1	1	1	1	1	1	1	1	1	10	10	10	10	10	10	10	1	1	1
		342	88	B	88:B		10	10	10	10	10	10	10	10	10	10	10	10	10	10	10	10	10	10	10	10	10	10	10	10	10	10	10	10	10	10	10	10	10	1	1	1	1	1	1	1	1	1	1
		343	88	C	88:C		10	10	10	10	10	10	10	10	10	10	10	10	10	10	10	10	10	10	10	10	10	10	10	10	10	10	10	10	10	10	10	10	10	10	10	10	10	10	10	10	10	10	10
		344	88	D	88:D		1	1	1	1	1	1	1	1	1	1	1	1	1	1	1	1	1	1	1	1	1	1	1	1	1	1	1	1	1	1	1	1	1	1	1	1	1	1	1	1	10	10	10
	87	345	89	A	89:A		10	10	10	10	10	10	10	10	10	10	10	10	10	10	10	10	10	10	10	10	10	10	10	10	10	10	10	1	1	10	10	10	10	10	10	10	10	10	10	10	10	10	10
		346	89	B	89:B		10	10	10	10	10	10	10	10	10	10	10	10	10	10	10	10	10	10	10	10	10	10	10	10	10	10	1	10	10	1	1	1	1	1	1	1	1	1	1	1	1	1	1
		347	89	C	89:C		1	1	1	1	1	1	1	1	1	1	1	1	1	1	1	1	1	1	1	1	1	1	1	10	1	1	1	1	1	1	1	1	1	1	10	10	10	10	10	10	10	10	10
		348	89	D	89:D		1	1	1	1	1	1	1	1	1	1	1	1	1	1	1	1	1	1	1	1	1	1	1	1	1	1	10	10	10	10	10	10	10	10	1	1	1	1	1	1	1	1	1
	88	349	90	A	90:A		10	10	10	10	10	10	10	10	10	10	10	10	10	10	10	10	10	10	10	10	10	10	10	10	10	10	10	10	10	10	10	10	10	10	10	10	10	10	10	10	10	10	10
		350	90	B	90:B		10	10	10	10	10	10	10	10	10	10	10	10	10	10	10	10	10	10	10	10	10	10	10	10	10	10	10	10	10	10	10	1	1	1	1	1	1	1	1	1	1	1	1
		351	90	C	90:C		1	1	1	1	1	1	1	1	1	1	1	1	1	1	1	1	1	1	1	1	1	1	1	1	1	1	1	1	1	1	1	10	10	10	10	10	10	10	10	10	10	10	10
		352	90	D	90:D		1	1	1	1	1	1	1	1	1	1	1	1	1	1	1	1	1	1	1	1	1	1	1	1	1	1	1	1	1	1	1	1	1	1	1	1	1	1	1	1	1	1	1
	89	353	91	A	91:A		10	10	10	10	10	10	10	10	10	10	10	10	10	10	10	10	10	10	10	10	10	10	10	10	10	10	10	10	10	10	10	10	10	10	10	10	10	10	10	10	10	10	10
		354	91	B	91:B		1	1	1	1	1	1	1	1	1	1	1	1	1	1	1	1	1	1	1	1	1	1	1	1	1	1	1	1	1	1	1	10	10	10	10	10	10	10	10	10	10	10	10
		355	91	C	91:C		1	1	1	1	1	1	1	1	1	1	1	1	1	1	1	1	1	1	1	1	1	1	1	1	1	1	1	1	1	1	1	1	1	1	1	1	1	1	1	1	1	1	1
		356	91	D	91:D		10	10	10	10	10	10	10	10	10	10	10	10	10	10	10	10	10	10	10	10	10	10	10	10	10	10	10	10	10	10	10	10	1	1	1	1	1	1	1	1	1	1	1
	90	357	93	A	93:A		1	1	1	1	1	1	1	1	1	1	1	1	1	1	1	1	1	1	1	1	1	1	1	1	1	1	1	1	1	1	1	1	1	1	1	1	1	1	1	1	1	1	1
		358	93	B	93:B		10	10	10	10	10	10	10	10	10	10	10	10	10	10	10	10	10	10	10	10	10	10	10	10	10	10	10	1	1	1	1	1	1	1	1	1	1	1	1	1	1	1	1
		359	93	C	93:C		1	1	1	1	1	1	1	1	1	1	1	1	1	1	1	1	1	1	1	1	1	1	1	1	1	1	1	10	10	10	10	10	10	10	10	10	10	10	10	10	10	10	10
		360	93	D	93:D		10	10	10	10	10	10	10	10	10	10	10	10	10	10	10	10	10	10	10	10	10	10	10	10	10	10	10	10	10	10	10	10	10	10	10	10	10	10	10	10	10	10	10
	91	361	94	A	94:A		1	1	1	1	1	1	1	1	1	1	1	1	1	1	1	1	1	1	1	1	10	10	10	10	10	10	10	10	10	10	10	10	10	10	10	10	10	10	10	10	10	10	10
		362	94	B	94:B		10	10	10	10	10	10	10	10	10	10	10	10	10	10	10	10	10	10	10	10	10	10	10	10	10	10	10	10	10	1	1	1	1	1	1	1	1	1	1	1	1	1	1
		363	94	C	94:C		10	10	10	10	10	10	10	10	10	10	10	10	10	10	10	10	10	10	10	10	1	1	1	1	1	1	1	1	1	10	10	10	10	10	10	10	10	10	10	10	10	10	10
		364	94	D	94:D		1	1	1	1	1	1	1	1	1	1	1	1	1	1	1	1	1	1	1	1	10	10	1	1	1	1	1	1	1	1	1	1	1	1	1	1	1	1	1	1	1	1	1
	92	365	95	A	95:A		1	1	1	1	1	1	1	1	1	1	1	1	1	1	1	1	1	1	1	1	1	1	1	1	1	1	10	10	10	10	10	10	10	1	1	1	1	1	1	1	1	1	1
		366	95	B	95:B		10	10	10	10	10	10	10	10	10	10	10	10	10	10	10	10	10	10	10	10	10	10	10	10	10	10	1	1	1	1	1	1	1	1	1	1	1	1	1	1	1	1	1
		367	95	C	95:C		1	1	1	1	1	1	1	1	1	1	1	1	1	1	1	1	1	1	1	1	1	1	1	1	1	1	1	1	1	1	1	1	1	10	10	10	10	10	10	10	10	10	10
		368	95	D	95:D		10	10	10	10	10	10	10	10	10	10	10	10	10	10	10	10	10	10	10	10	10	10	10	10	10	10	10	10	10	10	10	10	10	10	10	10	10	10	10	10	10	10	10
	93	369	96	A	96:A		10	10	10	10	10	10	10	10	10	10	10	10	10	10	10	10	10	10	10	10	10	10	10	10	10	10	10	10	10	10	10	10	10	1	1	1	1	1	1	1	1	1	1
		370	96	B	96:B		1	1	1	1	1	1	1	1	1	1	1	1	1	1	1	1	1	1	1	1	1	1	1	1	1	1	1	1	1	1	1	1	1	1	1	1	1	1	1	1	1	1	1
		371	96	C	96:C		10	10	10	10	10	10	10	10	10	10	10	10	10	10	10	10	10	10	10	10	10	10	10	10	10	10	10	10	1	10	10	10	10	10	10	10	10	10	10	10	10	10	10
		372	96	D	96:D		1	1	1	1	1	1	1	1	1	1	1	1	1	1	1	1	1	1	1	1	1	1	1	1	1	1	1	1	1	1	1	1	1	10	10	10	10	10	10	10	10	10	10
	94	373	97	A	97:A		1	1	1	1	1	1	1	1	1	1	1	1	1	1	1	1	1	1	1	1	10	10	10	10	10	10	10	10	10	10	10	10	10	10	10	10	1	1	1	1	1	1	1
		374	97	B	97:B		1	1	1	1	1	1	1	1	1	1	1	1	1	1	1	1	1	1	1	1	1	1	1	1	1	1	1	1	1	1	1	1	1	1	1	1	10	10	10	10	10	10	10
		375	97	C	97:C		10	10	10	10	10	10	10	10	10	10	10	10	10	10	10	10	10	10	10	10	10	10	10	10	10	10	10	1	1	1	1	1	1	1	1	1	1	1	1	1	1	1	1
		376	97	D	97:D		10	10	10	10	10	10	10	10	10	10	10	10	10	10	10	10	10	10	10	10	1	1	1	1	1	1	1	10	10	10	10	10	10	10	10	10	10	10	10	10	10	10	10
	95	377	99	A	99:A		1	1	1	1	1	1	1	1	1	1	1	1	1	1	1	1	1	1	1	1	1	1	1	1	1	1	1	1	1	1	1	10	10	10	10	10	10	10	10	10	10	10	10
		378	99	B	99:B		1	1	1	1	1	1	1	1	1	1	1	1	1	1	1	1	1	1	1	1	1	1	1	1	1	1	1	10	10	10	10	10	10	1	1	1	1	1	1	1	1	1	1
		379	99	C	99:C		10	10	10	10	10	10	10	10	10	10	10	10	10	10	10	10	10	10	10	10	10	10	10	10	10	10	10	10	10	10	10	10	10	10	10	10	10	10	10	10	10	10	10
		380	99	D	99:D		10	10	10	10	10	10	10	10	10	10	10	10	10	10	10	10	10	10	10	10	1	1	1	1	1	1	1	1	1	1	1	1	1	1	1	1	1	1	1	1	1	1	1
	96	381	101	A	101:A		10	10	10	10	10	10	10	10	10	10	10	10	10	10	10	10	10	10	10	10	10	10	10	10	10	10	10	1	1	1	1	1	1	1	1	1	1	1	1	1	1	1	1
		382	101	B	101:B		10	10	10	10	10	10	10	10	10	10	10	10	10	10	10	10	10	10	10	10	10	10	10	10	10	10	10	10	10	1	1	1	1	1	1	1	1	1	1	1	1	1	1
		383	101	C	101:C		1	1	1	1	1	1	1	1	1	1	1	1	1	1	1	1	1	1	10	1	1	1	1	1	1	1	1	1	1	10	10	10	10	10	10	10	10	10	10	10	10	10	10
		384	101	D	101:D		1	1	1	1	1	1	1	1	1	1	1	1	1	1	1	1	1	1	1	1	1	1	1	1	1	1	1	10	10	10	10	10	10	10	10	10	10	10	10	10	10	10	10
	97	385	102	A	102:A		1	1	1	1	1	1	1	1	1	1	1	1	1	1	1	1	1	1	1	1	1	1	1	1	1	1	1	1	1	1	1	1	1	10	10	10	10	10	10	10	10	10	10
		386	102	B	102:B		10	10	10	10	10	10	10	10	10	10	10	10	10	10	10	10	10	10	10	10	10	10	10	10	10	10	10	10	10	10	10	10	10	1	1	1	1	1	1	1	1	1	1
		387	102	C	102:C		1	1	1	1	1	1	1	1	1	1	1	1	1	1	1	1	1	1	1	1	1	1	1	1	1	1	1	10	10	10	10	10	10	1	10	10	10	10	10	10	10	10	10
		388	102	D	102:D		10	10	10	10	10	10	10	10	10	10	10	10	10	10	10	10	10	10	10	10	10	10	10	10	10	10	10	1	1	1	1	1	1	1	1	1	1	1	1	1	1	1	1
	98	389	103	A	103:A		10	10	10	10	10	10	10	10	10	10	10	10	10	10	10	10	10	10	10	10	10	10	10	10	10	10	10	10	10	10	10	10	10	10	10	10	10	10	10	10	10	10	10
		390	103	B	103:B		1	1	1	1	1	1	1	1	1	1	1	1	1	1	1	1	1	1	1	1	1	1	1	1	1	1	1	1	1	1	1	1	1	1	1	1	1	1	1	1	1	1	1
		391	103	C	103:C		1	1	1	1	1	1	1	1	1	1	1	1	1	1	1	1	1	1	1	1	1	1	1	1	1	1	1	1	1	1	1	1	1	1	1	1	1	1	1	1	1	1	1
		392	103	D	103:D		10	10	10	10	10	10	10	10	10	10	10	10	10	10	10	10	10	10	10	10	10	10	10	10	10	10	10	10	10	10	10	10	10	10	10	10	10	10	10	10	10	10	10
	99	393	104	A	104:A		1	1	1	1	1	1	1	1	1	1	1	1	1	1	1	1	1	1	1	1	1	1	1	1	1	1	1	1	1	10	10	10	10	10	10	10	10	10	10	10	10	10	10
		394	104	B	104:B		10	10	10	10	10	10	10	10	10	10	10	10	10	10	10	10	10	10	10	10	10	10	10	10	10	10	10	1	1	10	10	10	10	10	10	10	10	10	10	10	10	10	10
		395	104	C	104:C		1	1	1	1	1	1	1	1	1	1	1	1	1	1	1	1	1	1	1	1	1	1	1	1	1	1	1	10	10	1	1	1	1	1	1	1	1	1	1	1	1	1	1
		396	104	D	104:D		10	10	10	10	10	10	10	10	10	10	10	10	10	10	10	10	10	10	10	10	10	10	10	10	10	10	10	10	10	1	1	1	1	1	1	1	1	1	1	1	1	1	1
	100	397	105	A	105:A		10	10	10	10	10	10	10	10	10	10	10	10	10	10	10	10	10	10	10	10	10	10	10	10	10	10	1	1	1	1	1	1	1	1	1	1	1	1	1	1	1	1	1
		398	105	B	105:B		1	1	1	1	1	1	1	1	1	1	1	1	1	1	1	1	1	1	1	1	1	1	1	1	1	1	1	10	10	10	10	10	10	10	10	10	10	10	10	10	10	10	10
		399	105	C	105:C		1	1	1	1	1	1	1	1	1	1	1	1	1	1	1	1	1	1	1	1	1	1	1	1	1	1	10	1	1	1	1	1	1	1	1	1	1	1	1	1	1	1	1
		400	105	D	105:D		10	10	10	10	10	10	10	10	10	10	10	10	10	10	10	10	10	10	10	10	10	10	10	10	10	10	10	10	10	10	10	10	10	10	10	10	10	10	1	1	10	10	10
	101	401	106	A	106:A		1	1	1	1	1	1	1	1	1	1	1	1	1	1	1	1	1	1	1	1	1	1	1	1	1	1	1	1	1	1	1	1	1	10	10	1	1	1	1	1	1	1	1
		402	106	B	106:B		10	10	10	10	10	10	10	10	10	10	10	10	10	10	10	10	10	10	10	10	10	10	10	10	10	10	10	10	10	1	1	1	1	1	1	10	10	10	10	10	10	10	10
		403	106	C	106:C		1	1	1	1	1	1	1	1	1	1	1	1	1	1	1	1	1	1	1	1	1	1	1	1	1	1	1	1	10	10	10	10	10	1	1	1	1	1	1	1	1	1	1
		404	106	D	106:D		10	10	10	10	10	10	10	10	10	10	10	10	10	10	10	10	10	10	10	10	10	10	10	10	10	10	10	10	1	10	10	10	10	10	10	10	10	10	10	10	10	10	10
	102	405	107	A	107:A		1	1	1	1	1	1	1	1	1	1	1	1	1	1	1	1	1	1	1	1	1	1	1	1	1	1	1	1	1	1	1	1	1	1	1	1	1	1	1	1	1	1	1
		406	107	B	107:B		1	1	1	1	1	1	1	1	1	1	1	1	1	1	1	1	1	1	1	1	1	1	1	1	1	1	1	1	1	10	10	10	10	10	10	10	10	10	10	10	10	10	10
		407	107	C	107:C		10	10	10	10	10	10	10	10	10	10	10	10	10	10	10	10	10	10	10	10	10	10	10	10	10	10	10	10	10	10	10	10	10	10	10	10	10	10	10	10	10	10	10
		408	107	D	107:D		10	10	10	10	10	10	10	10	10	10	10	10	10	10	10	10	10	10	10	10	10	10	10	10	10	10	10	10	10	1	1	1	1	1	1	1	1	1	1	1	1	1	1
	103	409	108	A	108:A		1	1	1	1	1	1	1	1	1	1	1	1	1	1	1	1	1	1	1	1	1	1	1	1	1	1	1	10	10	1	1	1	1	1	1	1	1	1	1	1	1	1	1
		410	108	B	108:B		10	10	10	10	10	10	10	10	10	10	10	10	10	10	10	10	10	10	10	10	10	10	10	10	10	10	10	1	1	10	10	10	10	10	10	10	1	1	1	1	1	1	1
		411	108	C	108:C		10	10	10	10	10	10	10	10	10	10	10	10	10	10	10	10	10	10	10	10	10	10	10	10	10	10	10	10	10	10	10	10	10	10	10	10	10	10	10	10	10	10	10
		412	108	D	108:D		1	1	1	1	1	1	1	1	1	1	1	1	1	1	1	1	1	1	1	1	1	1	1	1	1	1	1	1	1	1	1	1	1	1	1	1	10	10	10	10	10	10	10
	104	413	109	A	109:A		1	1	1	1	1	1	1	1	1	1	1	1	1	1	1	1	1	1	1	1	1	1	1	1	1	1	1	1	1	1	1	1	1	1	1	1	1	1	1	1	1	1	1
		414	109	B	109:B		1	1	1	1	1	1	1	1	1	1	1	1	1	1	1	1	1	1	1	1	1	1	1	1	1	1	1	1	1	1	1	10	10	10	10	10	10	10	10	10	10	10	10
		415	109	C	109:C		10	10	10	10	10	10	10	10	10	10	10	10	10	10	10	10	10	10	10	10	10	10	10	10	10	10	10	10	10	10	10	1	1	1	1	1	1	1	1	1	1	1	1
		416	109	D	109:D		10	10	10	10	10	10	10	10	10	10	10	10	10	10	10	10	10	1	1	1	10	10	10	10	10	10	10	10	10	10	10	10	10	10	10	10	10	10	10	10	10	10	10
	105	417	110	A	110:A		1	1	1	1	1	1	1	1	1	1	1	1	1	1	1	1	1	1	1	1	1	1	1	1	1	1	1	10	10	10	10	10	10	10	10	10	10	10	10	10	10	10	10
		418	110	B	110:B		10	10	10	10	10	10	10	10	10	10	10	10	10	10	10	10	10	10	10	10	10	10	10	10	10	10	10	10	10	10	10	10	10	1	1	1	1	1	1	1	1	1	1
		419	110	C	110:C		1	1	1	1	1	1	1	1	1	1	1	1	1	1	1	1	1	1	1	1	1	1	1	1	1	1	1	1	1	1	1	1	1	1	1	1	1	1	1	1	1	1	1
		420	110	D	110:D		10	10	10	10	10	10	10	10	10	10	10	10	10	10	10	10	10	10	10	10	10	10	10	10	10	10	10	1	1	1	1	1	1	10	10	10	10	10	10	10	10	10	10
	106	421	111	A	111:A		10	10	10	10	10	10	10	10	10	10	10	10	10	10	10	10	10	10	10	10	10	10	10	10	10	10	10	1	1	1	1	1	1	1	1	1	1	1	1	1	1	1	1
		422	111	B	111:B		1	1	1	1	1	1	1	1	1	1	1	1	1	1	1	1	1	1	1	1	1	1	1	1	1	1	1	10	10	10	10	10	10	10	10	10	10	10	10	10	10	10	10
		423	111	C	111:C		10	10	10	10	10	10	10	10	10	10	10	10	10	10	10	10	10	10	10	10	10	10	10	10	10	10	10	10	10	10	10	10	10	10	10	10	10	10	10	10	10	10	10
		424	111	D	111:D		1	1	1	1	1	1	1	1	1	1	1	1	1	1	1	1	1	1	1	1	1	1	1	1	1	1	10	1	1	1	1	1	1	1	1	1	1	1	1	1	1	1	1
	107	425	112	A	112:A		1	1	1	1	1	1	1	1	1	1	1	1	1	1	1	1	1	1	1	1	1	1	1	1	1	1	1	1	1	1	1	1	1	10	10	10	10	10	10	10	10	10	10
		426	112	B	112:B		10	10	10	10	10	10	10	10	10	10	10	10	10	10	10	10	10	10	10	10	10	10	10	10	10	10	10	10	10	10	10	10	10	1	1	1	1	1	1	1	1	1	1
		427	112	C	112:C		10	10	10	10	10	10	10	10	10	10	10	10	10	10	10	10	10	10	10	10	10	10	10	10	10	10	10	1	1	1	1	1	1	1	1	1	1	1	1	10	1	1	1
		428	112	D	112:D		1	1	1	1	1	1	1	1	1	1	1	1	1	1	1	1	1	1	1	1	1	1	1	1	1	1	1	10	10	10	10	10	10	10	10	10	10	10	10	10	10	10	10
	108	429	113	A	113:A		1	1	1	1	1	1	1	1	1	1	1	1	1	1	1	1	1	1	1	1	1	1	1	1	1	1	1	1	1	1	1	1	1	1	1	1	1	1	1	1	1	1	1
		430	113	B	113:B		10	10	10	10	10	10	10	10	10	10	10	10	10	10	10	10	10	10	10	10	10	10	10	10	10	10	10	10	10	10	10	10	10	10	10	10	10	10	10	10	10	10	10
		431	113	C	113:C		10	10	10	10	10	10	10	10	10	10	10	10	10	10	10	10	10	10	10	10	10	10	10	10	10	10	10	10	10	1	1	1	1	1	1	1	1	1	1	1	1	1	1
		432	113	D	113:D		1	1	1	1	1	1	1	1	1	1	1	1	1	1	1	1	1	1	1	1	1	1	1	1	1	1	1	1	1	10	10	10	10	10	10	10	10	10	10	10	10	10	10
	109	433	114	A	114:A		1	1	1	1	1	1	1	1	1	1	1	1	1	1	1	1	1	1	1	1	1	1	1	1	1	1	1	1	1	1	1	10	10	10	10	10	10	10	10	10	10	10	10
		434	114	B	114:B		10	10	10	10	10	10	10	10	10	10	10	10	10	10	10	10	10	10	10	10	10	10	10	10	10	10	10	10	10	10	10	10	10	10	10	10	10	10	10	10	10	10	10
		435	114	C	114:C		10	10	10	10	10	10	10	10	10	10	10	10	10	10	10	10	10	10	10	10	10	10	10	10	10	10	10	10	10	10	10	1	1	1	1	1	1	1	1	1	1	1	1
		436	114	D	114:D		1	1	1	1	1	1	1	1	1	1	1	1	1	1	1	1	1	1	1	1	1	1	1	1	1	1	1	1	1	1	1	1	1	1	1	1	1	1	1	1	1	1	1
	110	437	115	A	115:A		10	10	10	10	10	10	10	10	10	10	10	10	10	10	10	10	10	10	10	10	10	10	10	10	10	10	10	1	1	1	1	1	1	10	10	10	10	10	10	10	10	10	10
		438	115	B	115:B		10	10	10	10	10	10	10	10	10	10	10	10	10	10	10	10	10	10	10	10	10	10	10	10	10	10	10	10	10	1	1	1	1	1	1	1	1	1	1	1	1	1	1
		439	115	C	115:C		1	1	1	1	1	1	1	1	1	1	1	1	1	1	1	1	1	10	10	10	1	1	1	1	1	1	1	1	1	10	10	10	10	1	1	1	1	1	1	1	1	1	1
		440	115	D	115:D		1	1	1	1	1	1	1	1	1	1	1	1	1	1	1	1	1	1	1	1	1	1	1	1	1	1	1	10	10	10	10	10	10	10	10	10	10	10	10	10	10	10	10
	111	441	116	A	116:A		1	1	1	1	1	1	1	1	1	1	1	1	1	1	1	1	1	1	1	1	1	1	1	1	1	1	1	10	10	10	10	1	1	1	1	1	1	1	1	1	1	1	1
		442	116	B	116:B		1	1	1	1	1	1	1	1	1	1	1	1	1	1	1	1	1	1	1	1	1	1	1	1	1	1	1	1	1	1	1	10	10	10	10	10	10	10	10	10	10	10	10
		443	116	C	116:C		10	10	10	10	10	10	10	10	10	10	10	10	10	10	10	10	10	10	10	10	10	10	10	10	10	10	10	1	1	1	1	1	1	1	1	1	1	1	1	1	1	1	1
		444	116	D	116:D		10	10	10	10	10	10	10	10	10	10	10	10	10	10	10	10	10	10	10	10	10	10	10	10	10	10	10	10	10	10	10	10	10	10	10	10	10	10	10	10	10	10	10
	112	445	117	A	117:A		10	10	10	10	10	10	10	10	10	10	10	10	10	10	10	10	10	10	10	10	10	10	10	10	10	10	10	1	1	1	1	1	1	1	1	1	1	1	10	1	1	1	1
		446	117	B	117:B		10	10	10	10	10	10	10	10	10	10	10	10	10	10	10	10	10	10	1	1	1	1	1	1	1	1	1	10	10	10	10	10	10	10	10	10	10	10	10	10	10	10	10
		447	117	C	117:C		1	1	1	1	1	1	1	1	1	1	1	1	1	1	1	1	1	1	1	1	1	1	1	1	1	1	1	1	1	1	1	1	1	1	1	1	1	1	1	1	1	1	1
		448	117	D	117:D		10	10	10	10	10	10	10	10	10	10	10	10	10	10	10	10	10	10	10	10	10	10	10	10	10	10	10	10	10	10	10	10	10	10	10	10	10	10	10	10	10	10	10
	113	449	118	A	118:A		10	10	10	10	10	10	10	10	10	10	10	10	10	10	10	10	10	10	10	10	10	10	10	10	10	10	10	1	1	1	1	1	1	1	1	1	1	1	1	1	1	1	1
		450	118	B	118:B		1	1	1	1	1	1	1	1	1	1	1	1	1	1	1	1	1	1	1	1	1	1	1	1	1	1	1	1	1	1	1	1	1	1	1	1	1	1	1	1	1	1	1
		451	118	C	118:C		1	1	1	1	1	1	1	1	1	1	1	1	1	1	1	1	1	1	1	1	1	1	1	1	1	1	1	10	10	10	10	10	10	10	10	10	10	10	10	10	10	10	10
		452	118	D	118:D		10	10	10	10	10	10	10	10	10	10	10	10	10	10	10	10	10	10	10	10	10	10	10	10	10	10	10	10	10	10	10	10	10	10	10	10	10	10	10	10	10	10	10
	114	453	119	A	119:A		1	1	1	1	1	1	1	1	1	1	1	1	1	1	1	1	1	1	1	1	1	1	1	1	1	1	1	1	1	1	1	1	1	1	1	1	1	1	1	1	1	1	1
		454	119	B	119:B		1	1	1	1	1	1	1	1	1	1	1	1	1	1	1	1	1	10	10	10	10	10	10	10	10	10	10	10	10	10	10	10	10	10	10	10	10	10	10	10	10	10	10
		455	119	C	119:C		10	10	10	10	10	10	10	10	10	10	10	10	10	10	10	10	10	10	10	10	10	10	10	10	10	10	10	1	1	1	1	10	10	10	10	10	10	10	10	10	10	10	10
		456	119	D	119:D		10	10	10	10	10	10	10	10	10	10	10	10	10	10	10	10	10	10	10	10	1	1	1	1	1	1	1	1	1	10	10	1	1	1	1	1	1	1	1	1	1	1	1
	115	457	120	A	120:A		1	1	1	1	1	1	1	1	1	1	1	1	1	1	1	1	1	1	1	1	1	1	1	1	1	1	1	1	1	1	1	1	1	1	1	1	1	1	1	1	1	1	1
		458	120	B	120:B		10	10	10	10	10	10	10	10	10	10	10	10	10	10	10	10	10	10	10	10	10	10	10	10	10	10	10	10	10	10	10	10	10	10	10	10	10	10	10	10	10	10	10
		459	120	C	120:C		10	10	10	10	10	10	10	10	10	10	10	10	10	10	10	10	10	10	10	10	10	10	10	10	10	10	10	10	10	10	10	10	10	10	10	10	10	10	10	10	10	10	10
		460	120	D	120:D		1	1	1	1	1	1	1	1	1	1	1	1	1	1	1	1	1	1	1	1	1	1	1	1	1	1	1	1	1	1	1	1	1	1	1	1	1	1	1	1	1	1	1
	116	461	121	A	121:A		10	10	10	10	10	10	10	10	10	10	10	10	10	10	10	10	10	10	10	10	10	10	10	10	10	10	10	1	1	1	1	1	1	1	1	1	1	1	1	1	1	1	1
		462	121	B	121:B		1	1	1	1	1	1	1	1	1	1	1	1	1	1	1	1	1	1	1	1	1	1	1	1	1	1	1	10	10	10	10	10	10	10	10	10	10	10	10	10	10	10	10
		463	121	C	121:C		10	10	10	10	10	10	10	10	10	10	10	10	10	10	10	10	10	10	10	10	10	10	10	10	10	10	10	10	10	10	10	1	1	1	1	1	1	1	1	1	1	1	1
		464	121	D	121:D		1	1	1	1	1	1	1	1	1	1	1	1	1	1	1	1	1	1	1	1	1	1	1	1	1	1	1	1	1	1	1	10	10	10	10	10	10	10	10	10	10	10	10
	117	465	122	A	122:A		1	1	1	1	1	1	1	1	1	1	1	1	1	1	1	1	1	1	1	1	1	1	1	1	1	1	1	1	1	1	1	1	1	10	10	10	10	10	10	10	10	10	10
		466	122	B	122:B		1	1	1	1	1	1	1	1	1	1	1	1	1	1	1	1	1	1	1	1	1	1	1	1	1	1	1	1	1	1	1	1	1	1	1	1	1	1	1	1	1	1	1
		467	122	C	122:C		10	10	10	10	10	10	10	10	10	10	10	10	10	10	10	10	10	10	10	10	10	10	10	10	10	10	10	10	10	10	10	10	10	1	1	1	1	1	1	1	1	1	1
		468	122	D	122:D		10	10	10	10	10	10	10	10	10	10	10	10	10	10	10	10	10	10	10	10	10	10	10	10	10	10	10	10	10	10	10	10	10	10	10	10	10	10	10	10	10	10	10
	118	469	123	A	123:A		10	10	10	10	10	10	10	10	10	10	10	10	10	10	10	10	10	10	10	10	10	10	10	10	10	10	10	10	10	1	1	1	1	1	1	1	1	1	1	1	1	1	1
		470	123	B	123:B		1	1	1	1	1	1	1	1	1	1	1	1	1	1	1	1	1	1	1	1	1	1	1	1	1	1	1	1	1	1	1	1	1	1	1	1	1	1	1	1	1	1	1
		471	123	C	123:C		10	10	10	10	10	10	10	10	10	10	10	10	10	10	10	10	10	10	10	10	10	10	10	10	10	10	10	1	1	10	10	10	10	10	10	10	10	10	10	10	10	10	10
		472	123	D	123:D		1	1	1	1	1	1	1	1	1	1	1	1	1	1	1	1	1	1	1	1	1	1	1	1	1	1	1	10	10	10	10	10	10	10	10	10	10	10	10	10	10	10	10
	119	473	124	A	124:A		10	10	10	10	10	10	10	10	10	10	10	10	10	10	10	10	10	10	10	10	10	10	10	10	10	10	1	1	1	1	1	1	1	1	1	1	1	1	1	1	1	1	1
		474	124	B	124:B		1	1	1	1	1	1	1	1	1	1	1	1	1	1	1	1	1	1	1	1	1	1	1	1	1	1	10	10	10	10	10	10	10	10	10	10	10	10	10	10	10	10	10
		475	124	C	124:C		1	1	1	1	1	1	1	1	1	1	1	1	1	1	1	1	1	1	1	1	1	1	1	1	1	1	1	1	1	1	1	1	1	1	1	1	1	1	1	1	1	1	1
		476	124	D	124:D		10	10	10	10	10	10	10	10	10	10	10	10	10	10	10	10	10	10	10	10	10	10	10	10	10	10	10	10	10	10	10	10	10	10	10	10	10	10	10	10	10	10	10
	120	477	125	A	125:A		10	10	10	10	10	10	10	10	10	10	10	10	10	10	10	10	10	10	10	10	10	10	10	10	10	10	10	10	10	10	10	10	10	10	10	10	10	10	10	10	10	10	10
		478	125	B	125:B		10	10	10	10	10	10	10	10	10	10	10	10	10	10	10	10	10	10	10	10	10	10	10	10	10	10	10	1	1	1	1	1	1	1	1	1	1	1	1	1	1	1	1
		479	125	C	125:C		1	1	1	1	1	1	1	1	1	1	1	1	1	1	1	1	1	1	1	1	1	1	1	1	1	1	1	1	1	1	1	1	1	1	1	1	1	1	1	1	1	1	1
		480	125	D	125:D		1	1	1	1	1	1	1	1	1	1	1	1	1	1	1	1	1	1	1	1	1	1	1	1	1	1	1	10	10	10	10	10	10	10	10	10	10	10	10	10	10	10	10
[truncated: 2,922 more columns]
